# Supplementary material for: Synthesis and Structural Study of Amidrazone Derived Pyrrole-2,5-Dione Derivatives: Potential Anti-Inflammatory Agents
Source: MDPI journal article supplement (doi:10.3390/molecules27092891), 2022-04-30
Supplement: s1 [file s1]

# Synthesis and structural study of pyrrole-2,5-dione derivatives: potential anti-inflammatory agents

Renata Paprocka\*, Leszek Pazderski, Liliana Mazur, Małgorzata Wiese-Szadkowska, Jolanta Kutkowska, Michalina Nowak, Anna Helmin-Basa\*

\*Correspondence: renata.bursa@cm.umk.pl and a.helmin-basa@cm.umk.pl.

## TABLE OF CONTENTS:

- A. REVIEW OF  $^1\text{H}$ ,  $^{13}\text{C}$  NMR AND SINGLE CRYSTAL X-RAY DATA FOR SELECTED DERIVATIVES OF 1H-PYRROLE-2,5-DIONE
- B. DETAILS OF SYNTHESSES OF 2a-2f
- C.  $^1\text{H}$  AND  $^{13}\text{C}$  NMR SPECTRA OF 1a-1f and 2a-2f (A, B ISOMERS)
- D.  $^1\text{H}$  AND  $^{13}\text{C}$  NMR DATA OF 1a-1f and 2a-2f (A, B ISOMERS)
- E. SUMMARY AND DISCUSSION OF  $^1\text{H}$  AND  $^{13}\text{C}$  NMR CHEMICAL SHIFTS FOR 2a-2f (A AND B ISOMERS), COMPARED TO THOSE OF 1a-1f
- F. X-RAY STRUCTURES OF 2a AND 2d
- G. TOXICITY OF 2a-2f IN PBMC CULTURE
- H. ANTIBACTERIAL ACTIVITY OF 2a-2f

## PART A. REVIEW OF $^1\text{H}$ , $^{13}\text{C}$ NMR AND SINGLE CRYSTAL X-RAY DATA FOR SELECTED DERIVATIVES OF 1H-PYRROLE-2,5-DIONE

Table S1.  $^1\text{H}$ ,  $^{13}\text{C}$  NMR and single crystal X-ray data for selected derivatives of 1H-pyrrole-2,5-dione

| Class of chemicals: 1H-pyrrole-2,5-diones (L)         | Compound                                               | $^1\text{H}$ and $^{13}\text{C}$ NMR data | Single crystal X-ray data <sup>a</sup> |
|-------------------------------------------------------|--------------------------------------------------------|-------------------------------------------|----------------------------------------|
| 1H-pyrrole-2,5-dione ( $L^1$ )<br>and its derivatives | $L^1$                                                  | [A,B]                                     | TEKQAB [C]                             |
|                                                       | 1-methyl- $L^1$                                        | [D,E,F]                                   |                                        |
|                                                       | 1,1-dimethylamino- $L^1$                               | [G]                                       |                                        |
|                                                       | 1-phenylamino- $L^1$                                   | [G,H]                                     |                                        |
|                                                       | 1-(4-methylphenyl)amino- $L^1$                         | [G]                                       |                                        |
|                                                       | 1-(4-methoxyphenyl)amino- $L^1$                        | [G]                                       |                                        |
|                                                       | 1-(4-bromophenylamino)- $L^1$                          | [I]                                       | CARHAF [I]                             |
|                                                       | 1-(piperidin-1-yl)- $L^1$                              | [G]                                       |                                        |
|                                                       | 1-(morpholin-4-yl)- $L^1$                              | [G]                                       |                                        |
|                                                       | 1-(4-methylpiperazin-1-yl)- $L^1$                      | [G]                                       |                                        |
|                                                       | 1,1-diphenylamino- $L^1$                               | [G]                                       |                                        |
|                                                       | 1-(E-4-phenylbut-3-en-2-ylideneimino)- $L^1$           | [J]                                       |                                        |
|                                                       | 1-(E-4-(2-fluorophenyl)but-3-en-2-ylideneimino)- $L^1$ | [J]                                       |                                        |

|                                                                                        |                                                                                          |             |                            |
|----------------------------------------------------------------------------------------|------------------------------------------------------------------------------------------|-------------|----------------------------|
|                                                                                        | 1-( <i>E</i> -4-(3,5-bis(trifluoromethyl)phenyl)but-3-en-2-ylidene)imino)-L <sup>1</sup> | [J]         |                            |
|                                                                                        | 1-( <i>E</i> -4-(2,4-dichlorophenyl)but-3-en-2-ylideneimino)-L <sup>1</sup>              | [J]         |                            |
|                                                                                        | 1-( <i>E</i> -4-(4-nitrophenyl)but-3-en-2-ylideneimino)-L <sup>1</sup>                   | [J]         |                            |
| <i>3-methyl-1H-pyrrole-2,5-dione (L<sup>2</sup>) and its derivatives</i>               | L <sup>2</sup>                                                                           | [K,L,M,N,O] |                            |
|                                                                                        | 1-methyl-L <sup>2b</sup>                                                                 | [K,N,P]     |                            |
|                                                                                        | 1-phenylamino-L <sup>2</sup>                                                             | [Q]         | COXYEV [Q]                 |
|                                                                                        | L <sup>2</sup> -L <sup>2c</sup>                                                          | [Q]         | TUBBID [Q]                 |
|                                                                                        | 1-( <i>E</i> -4-phenylbut-3-en-2-ylideneimino)-L <sup>2</sup>                            | [J]         |                            |
|                                                                                        | 1-( <i>E</i> -4-(3,5-bis(trifluoromethyl)phenyl)but-3-en-2-ylidene)imino)-L <sup>2</sup> | [J]         |                            |
|                                                                                        | 1-( <i>E</i> -4-(2,4-dichlorophenyl)but-3-en-2-ylideneimino)-L <sup>2</sup>              | [J]         |                            |
| <i>3,4-dimethyl-1H-pyrrole-2,5-dione (L<sup>3</sup>) and its derivatives</i>           | L <sup>3</sup>                                                                           | [B,K,R,S]   |                            |
|                                                                                        | 1-methyl-L <sup>3d</sup>                                                                 | [K]         |                            |
|                                                                                        | 1-phenylamino-L <sup>3</sup>                                                             | [Q]         | COXYUL [Q]                 |
|                                                                                        | L <sup>3</sup> -L <sup>3e</sup>                                                          | [Q]         | COXYAR [Q]<br>COXYAR01 [Q] |
|                                                                                        | 1,1-dimethylamino-L <sup>3</sup>                                                         | [T]         |                            |
| <i>3,4-diethyl-1H-pyrrole-2,5-dione (L<sup>4</sup>) and its derivatives/analogues</i>  | L <sup>4</sup>                                                                           | [U]         |                            |
| <i>3,4-diphenyl-1H-pyrrole-2,5-dione (L<sup>5</sup>) and its derivatives/analogues</i> | L <sup>5</sup>                                                                           | [R,V]       |                            |
|                                                                                        | L <sup>5</sup> · 1-methylpyrrolidin-2-one                                                |             | NIXRUJ [W]                 |
|                                                                                        | 1-methyl-L <sup>5</sup>                                                                  | [X,Y,Z,AA]  |                            |
|                                                                                        | 1-benzamido-L <sup>5</sup>                                                               | [BB]        |                            |
|                                                                                        | 1-(4-methoxybenzamido)-L <sup>5</sup>                                                    | [BB]        |                            |
|                                                                                        | 1-(4-bromobenzamido)-L <sup>5</sup>                                                      | [BB]        | KUQRIZ [BB]                |
|                                                                                        | 1-(4-nitrobenzamido)-L <sup>5</sup>                                                      | [BB]        |                            |
|                                                                                        | 1-methoxycarbonylamino-3,4-bis(4-nitrophenyl)-1 <i>H</i> -pyrrole-2,5-dione              |             | TAJSIG [CC]                |

<sup>a</sup> Reference codes from Cambridge Structure Database [DD]

<sup>b</sup> Systematic name of this species: 1,3-dimethyl-1*H*-pyrrole-2,5-dione

<sup>c</sup> Systematic name of this dimeric species: 3,3'-dimethyl-1,1'-bipyrrole-2,2',5,5'-tetraone

<sup>d</sup> Systematic name of this species: 1,3,4-trimethyl-1*H*-pyrrole-2,5-dione

<sup>e</sup> Systematic name of this dimeric species: 3,3',4,4'-tetramethyl-1,1'-bipyrrole-2,2',5,5'-tetraone

## PART B. DETAILS OF SYNTHESSES OF 2a-2f

Table S2. The details of synthesis of **2a** ( $R^1 = R^2 = \text{phenyl}$ )

| Solvent       | temp.    | yield | m.p.       |
|---------------|----------|-------|------------|
| toluene       | r.t. 14d | 59%   | 152-154 °C |
| toluene       | b.p. 5h  | 91%   | 152-154 °C |
| chloroform    | r.t. 4d  | 84%   | 152-155 °C |
| chloroform    | b.p. 5h  | 71%   | 153-154 °C |
| diethyl ether | r.t. 2d  | 53%   | 153-155 °C |

Table S3. The details of synthesis of **2b** ( $R^1 = 2\text{-pyridyl}$ ,  $R^2 = \text{phenyl}$ )

| solvent       | temp.    | yield | m.p.       |
|---------------|----------|-------|------------|
| Toluene       | r.t. 10d | 69%   | 174-177 °C |
| toluene       | b.p. 5h  | 95%   | 177-179 °C |
| chloroform    | r.t. 20d | 84%   | 176-178 °C |
| chloroform    | b.p. 5h  | 78%   | 177-179 °C |
| diethyl ether | r.t. 21d | 21%   | 173-175 °C |

Table S4. The details of synthesis of **2c** ( $R^1 = 4\text{-pyridyl}$ ,  $R^2 = \text{phenyl}$ )

| Solvent       | temp.    | yield | m.p.       |
|---------------|----------|-------|------------|
| toluene       | r.t. 11d | 73%   | 206-215 °C |
| toluene       | b.p. 5h  | 64%   | 210-215 °C |
| chloroform    | r.t. 11d | 84%   | 214-217 °C |
| chloroform    | b.p. 5h  | 92%   | 208-211 °C |
| diethyl ether | r.t. 12d | 74%   | 214-216 °C |

Table S5. The details of synthesis of **2d** ( $R^1 = R^2 = 2\text{-pyridyl}$ )

| Solvent       | temp.    | yield | m.p.       |
|---------------|----------|-------|------------|
| diethyl ether | r.t. 11d | 67%   | 180-183 °C |

Table S6. The details of synthesis of **2e** ( $R^1 = 2\text{-pyridyl}$ ,  $R^2 = 4\text{-methylphenyl}$ )

| solvent       | temp.    | yield | m.p.       |
|---------------|----------|-------|------------|
| toluene       | r.t. 11d | 39%   | 198-201 °C |
| toluene       | b.p. 5h  | 76%   | 195-200 °C |
| chloroform    | r.t. 11d | 84%   | 199-201 °C |
| chloroform    | b.p. 5h  | 68%   | 198-201 °C |
| diethyl ether | r.t. 14d | 51%   | 198-201 °C |

Table S7. The details of synthesis of **2f** ( $R^1 = 2\text{-pyridyl}$ ,  $R^2 = 4\text{-nitrophenyl}$ )

| solvent       | temp.    | Yield | m.p.       |
|---------------|----------|-------|------------|
| toluene       | r.t. 7d  | 38%   | 206-211 °C |
| toluene       | b.p. 5h  | 35%   | 216-222 °C |
| chloroform    | r.t. 7d  | 75%   | 218-223 °C |
| chloroform    | b.p. 5h  | 70%   | 220-224 °C |
| diethyl ether | r.t. 11d | 18%   | 219-223 °C |

r.t. - room temperature, b.p. – boiling point

## PART C. $^1\text{H}$ AND $^{13}\text{C}$ NMR SPECTRA OF 1a-1f and 2a-2f (A, B ISOMERS)

The standard  $^1\text{H}$  and  $^{13}\text{C}$  NMR spectra, as well as the  $^1\text{H}$ - $^{13}\text{C}$  HMQC and  $^1\text{H}$ - $^{13}\text{C}$  HMBC two-dimensional ones of **1a-1f** and **2a-2f** compounds, are shown below at Figures S1-S48.

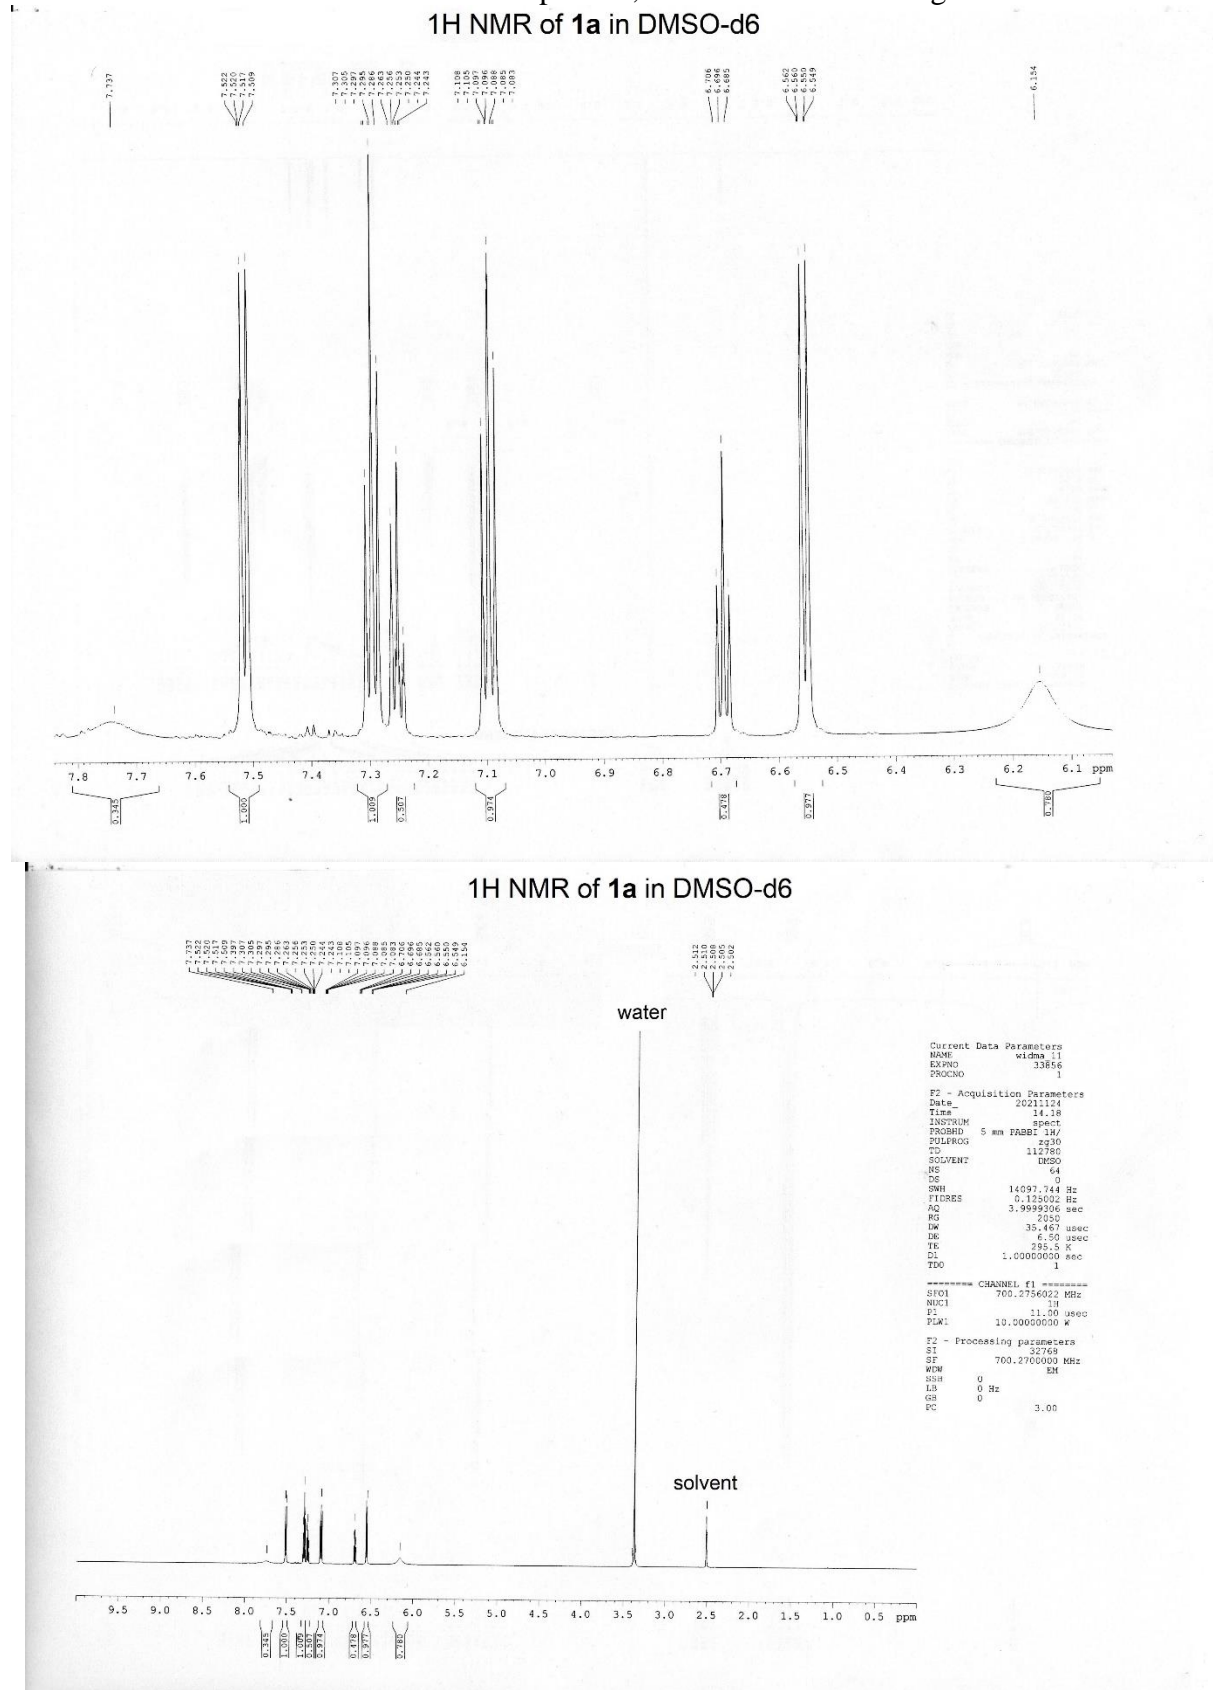

Figure S1.  $^1\text{H}$  NMR spectrum of **1a** (in DMSO- $d_6$ ), with enlarged fragment at the top



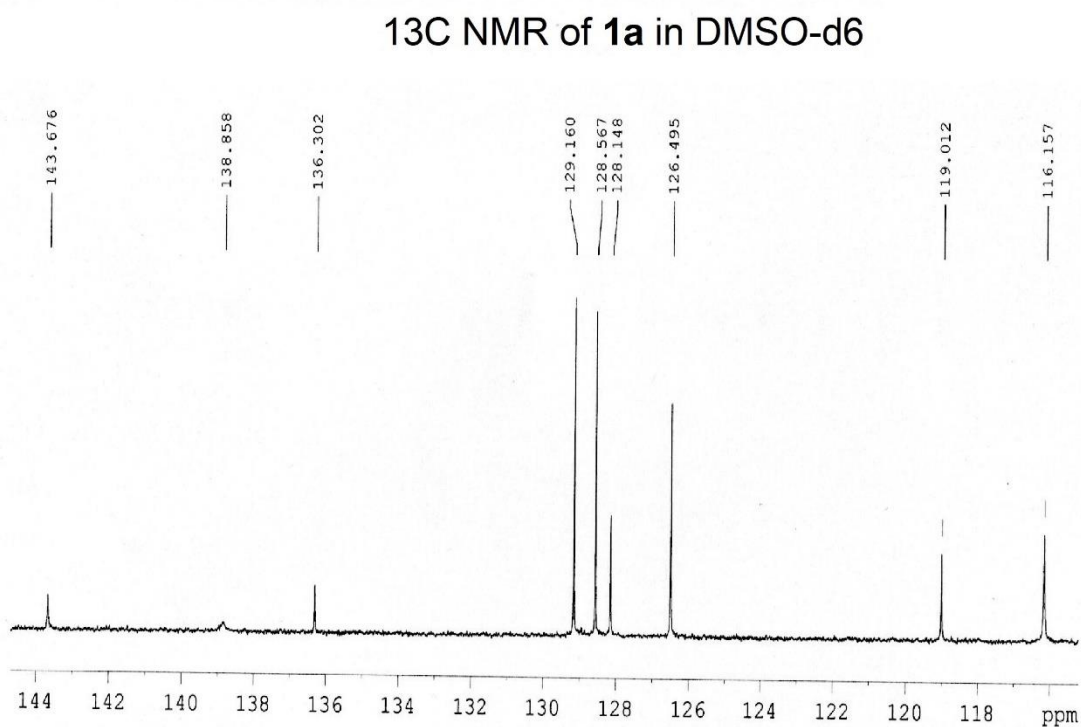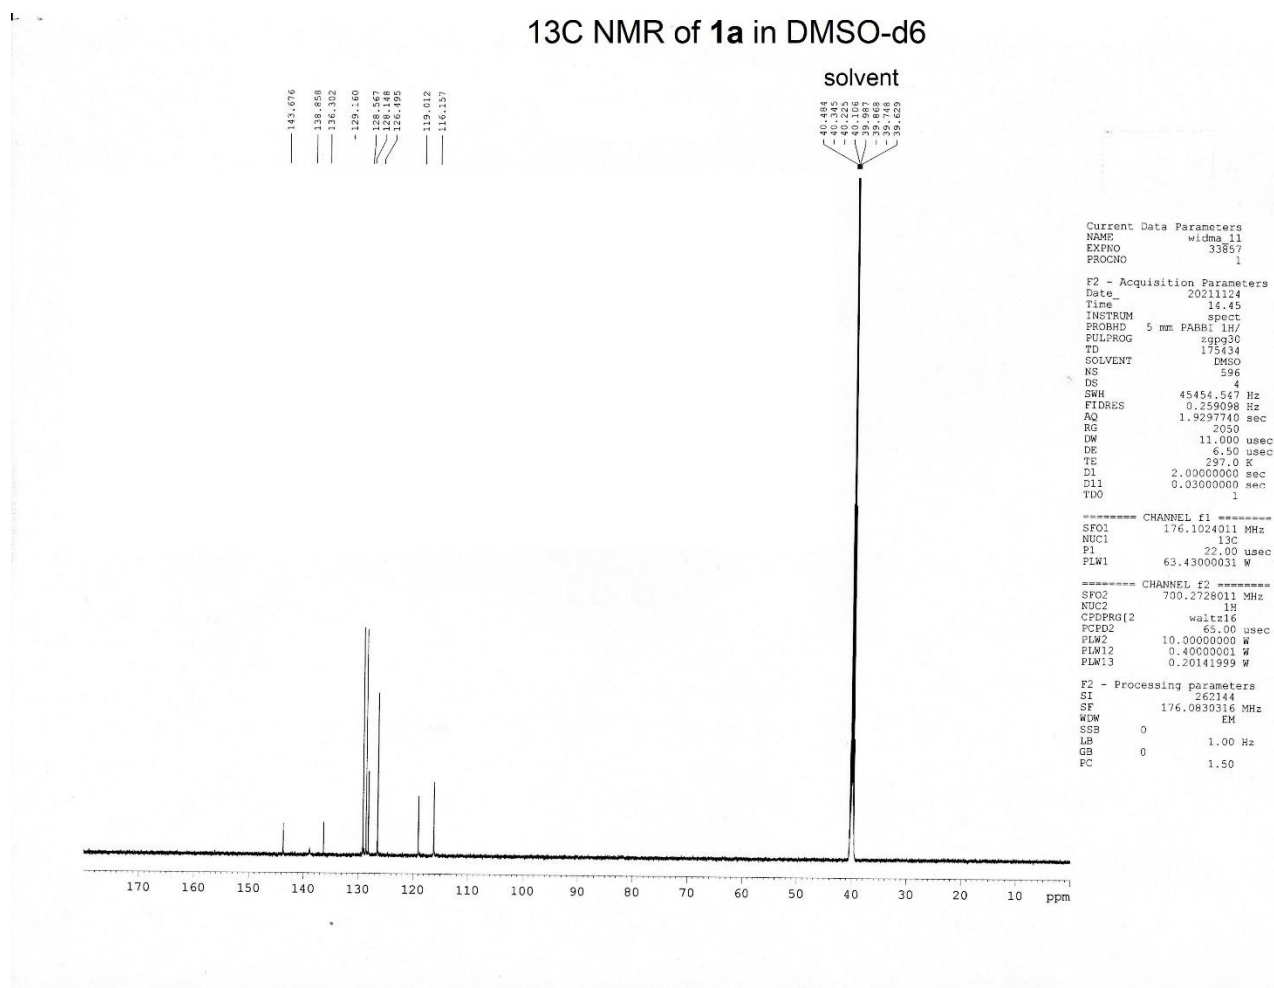

Figure S2.  $^{13}\text{C}$  NMR spectrum of **1a** (in DMSO- $d_6$ ), with enlarged fragment at the top

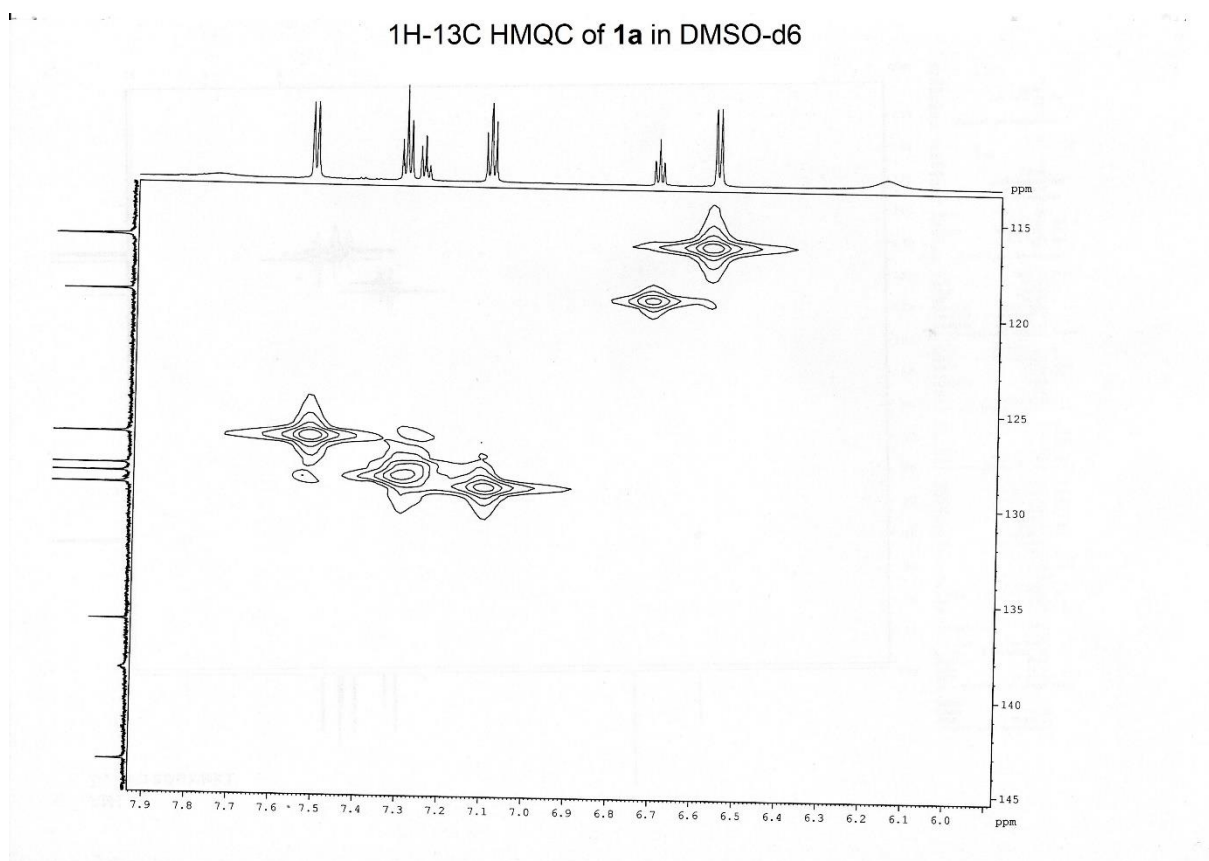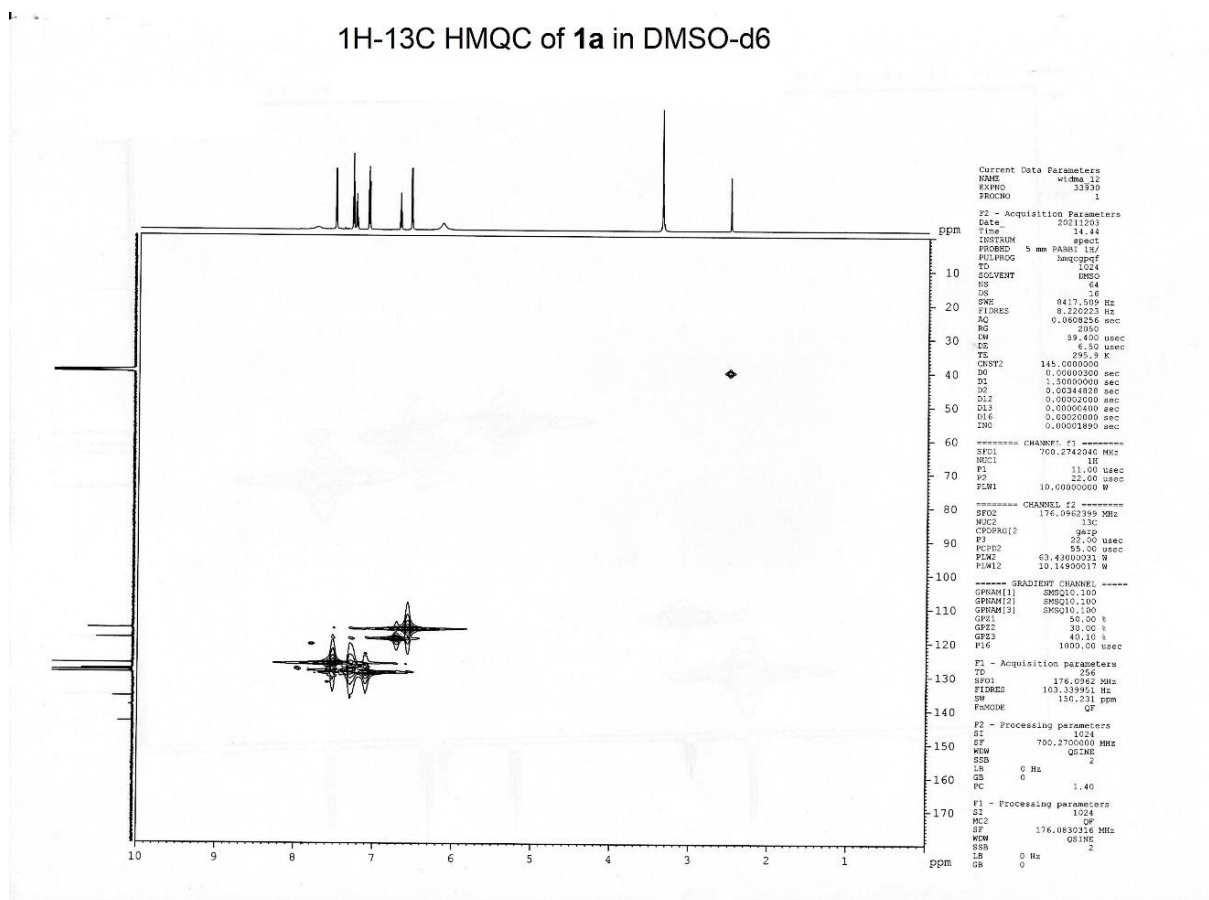

Figure S3.  $^1\text{H}$ - $^{13}\text{C}$  HMQC spectrum of **1a** (in DMSO- $d_6$ ), with enlarged fragment at the top

$^1\text{H}$ - $^{13}\text{C}$  HMBC of **1a** in DMSO- $d_6$

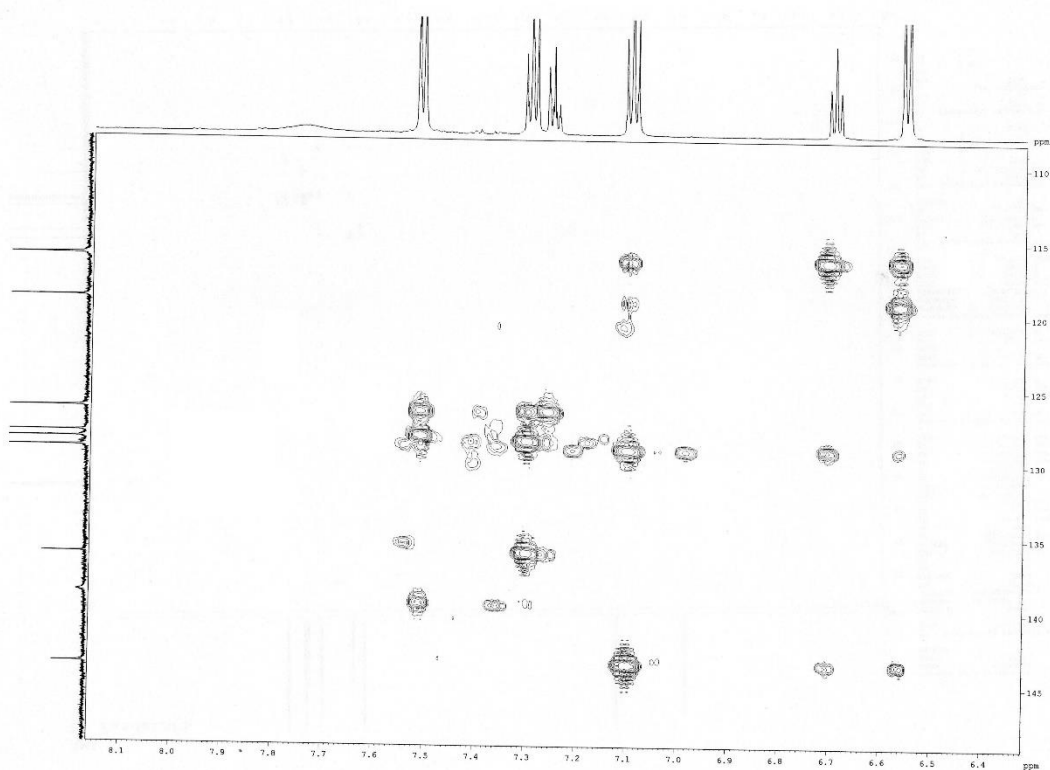

$^1\text{H}$ - $^{13}\text{C}$  HMBC of **1a** in DMSO- $d_6$

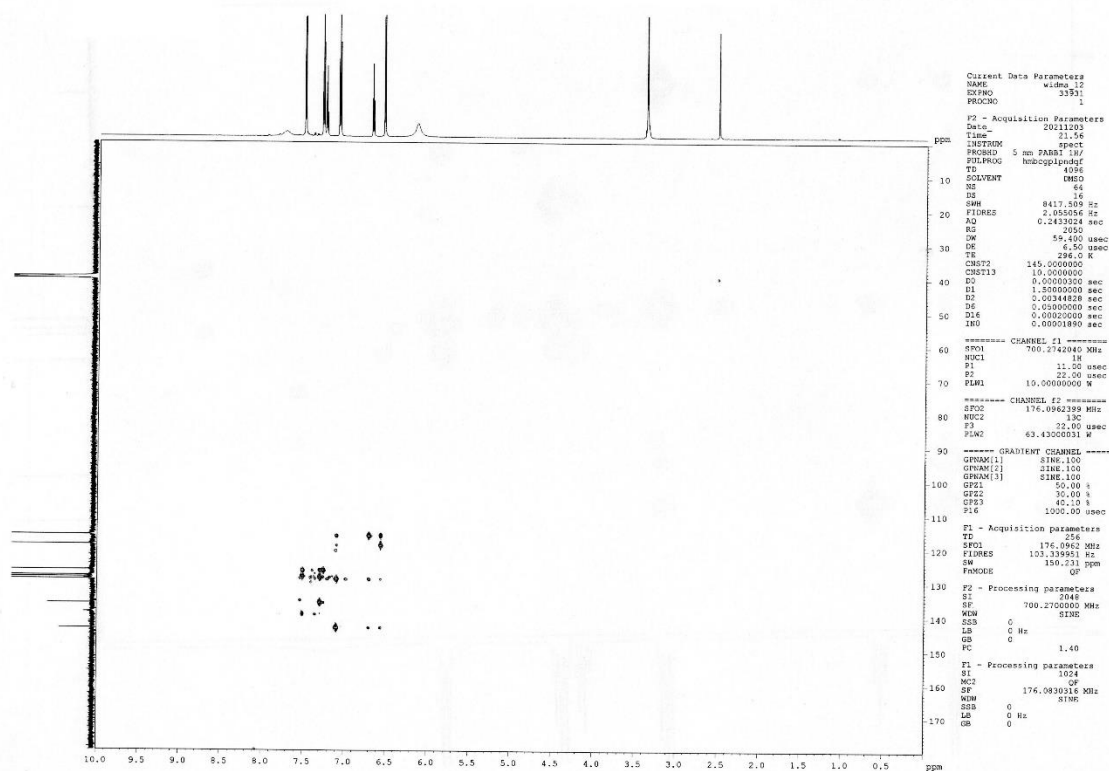

Figure S4.  $^1\text{H}$ - $^{13}\text{C}$  HMBC spectrum of **1a** (in DMSO- $d_6$ ), with enlarged fragment at the top

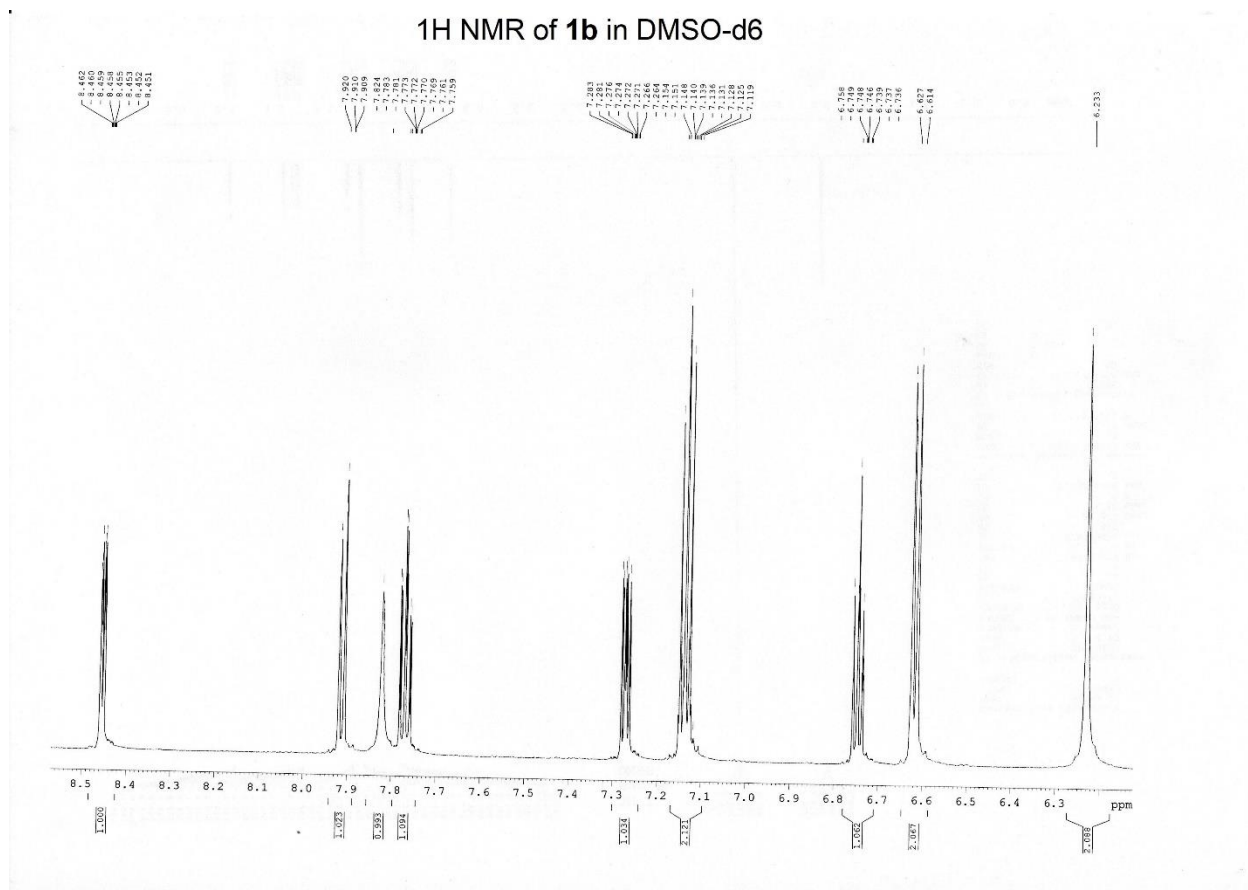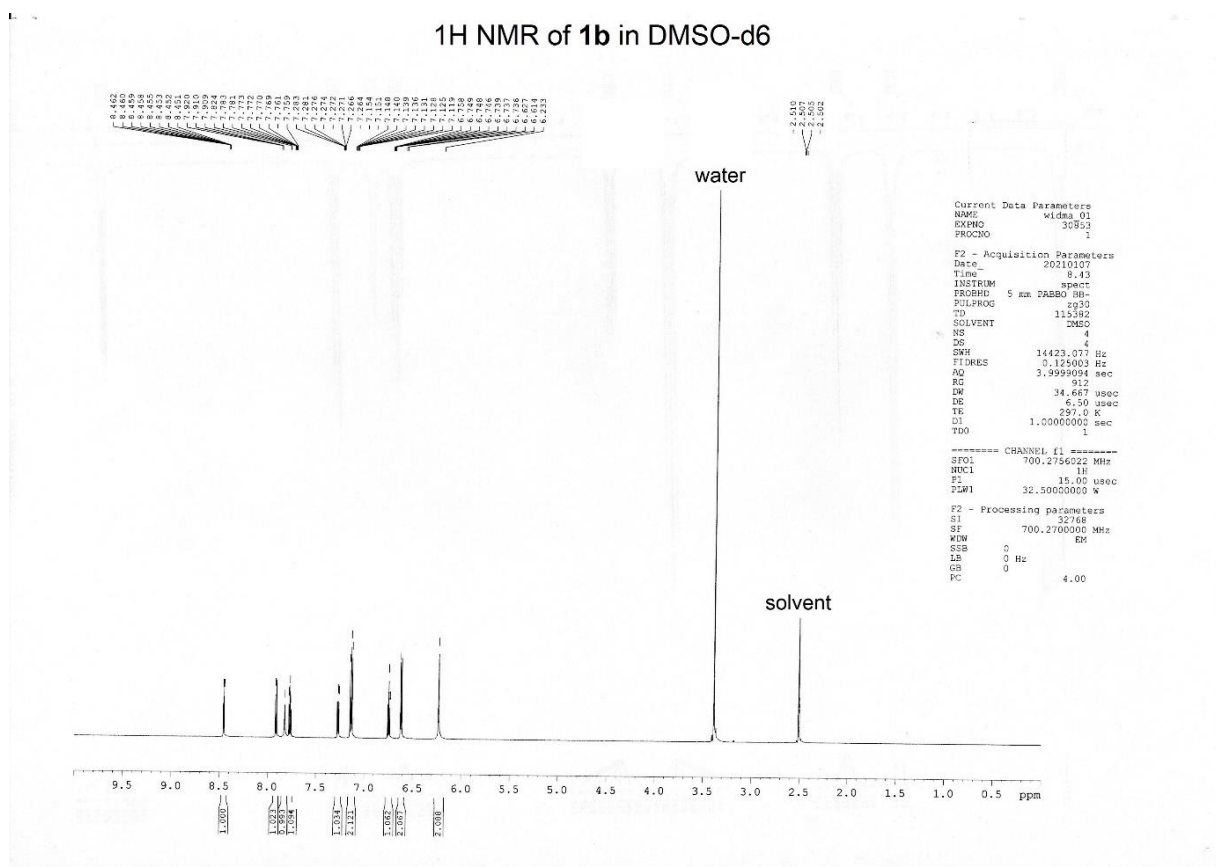

Figure S5. <sup>1</sup>H NMR spectrum of **1b** (in DMSO-d<sub>6</sub>), with enlarged fragment at the top

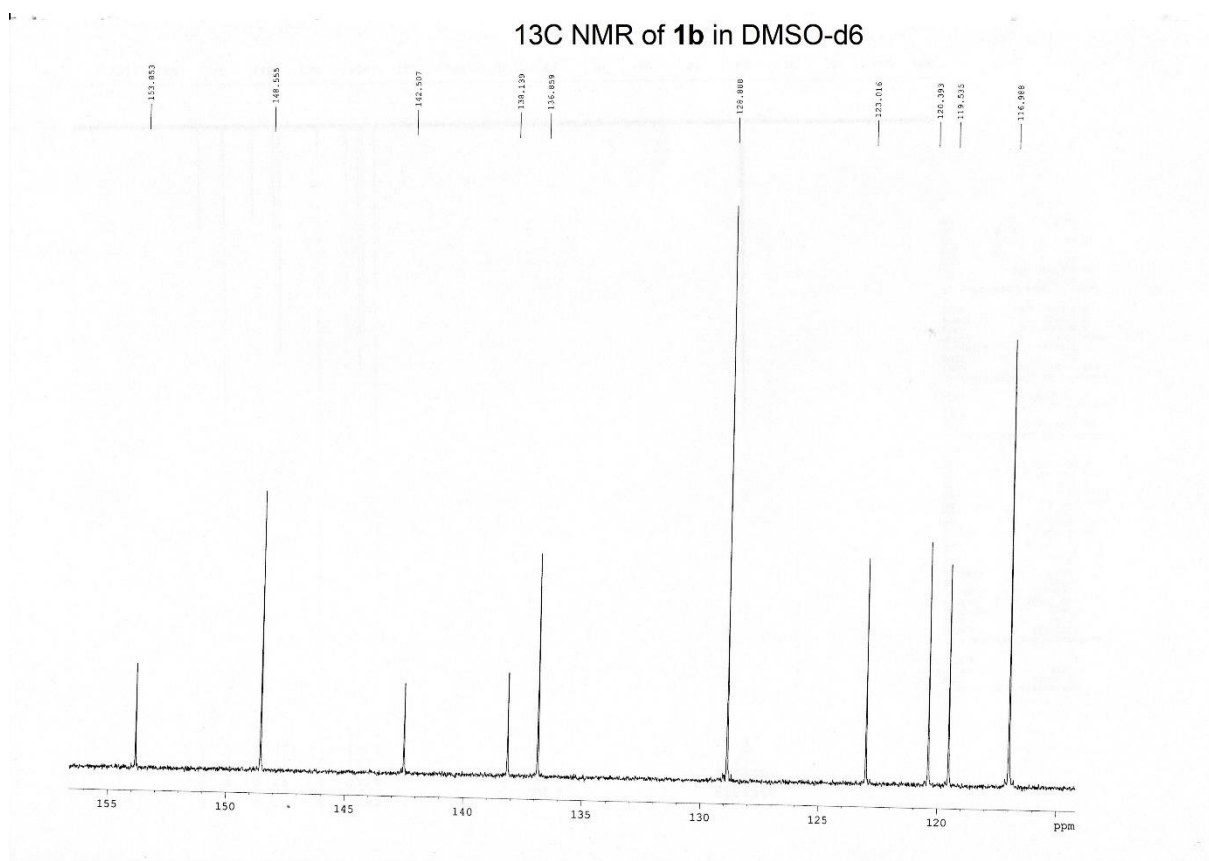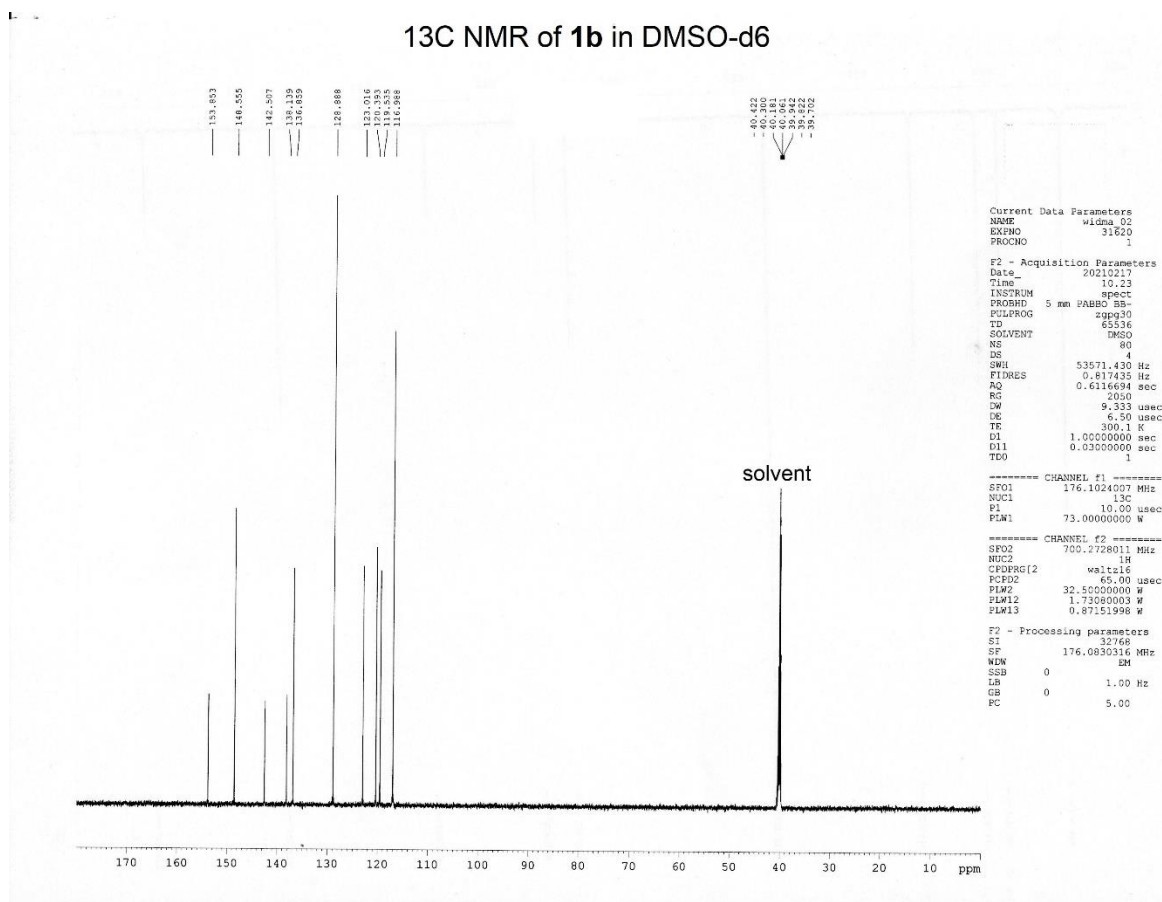

Figure S6. <sup>13</sup>C NMR spectrum of **1b** (in DMSO-d<sub>6</sub>), with enlarged fragment at the top



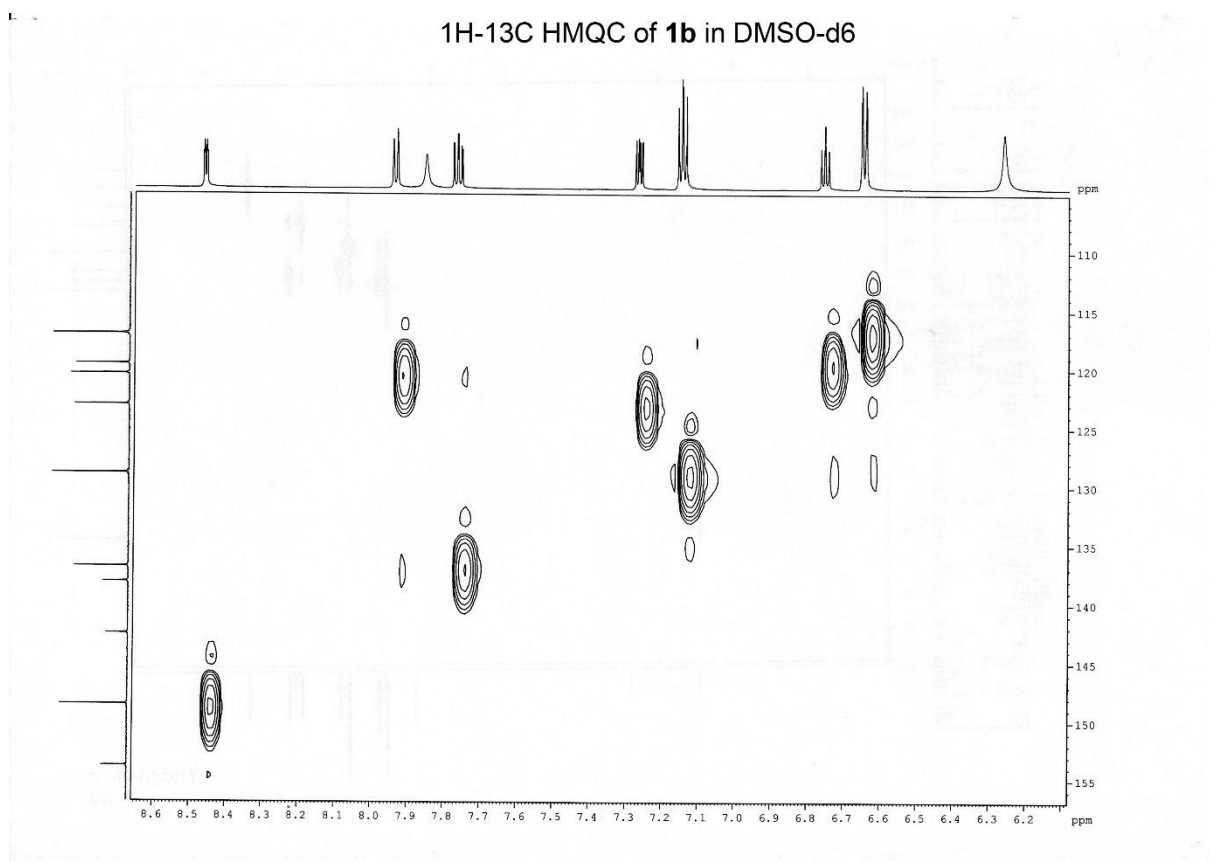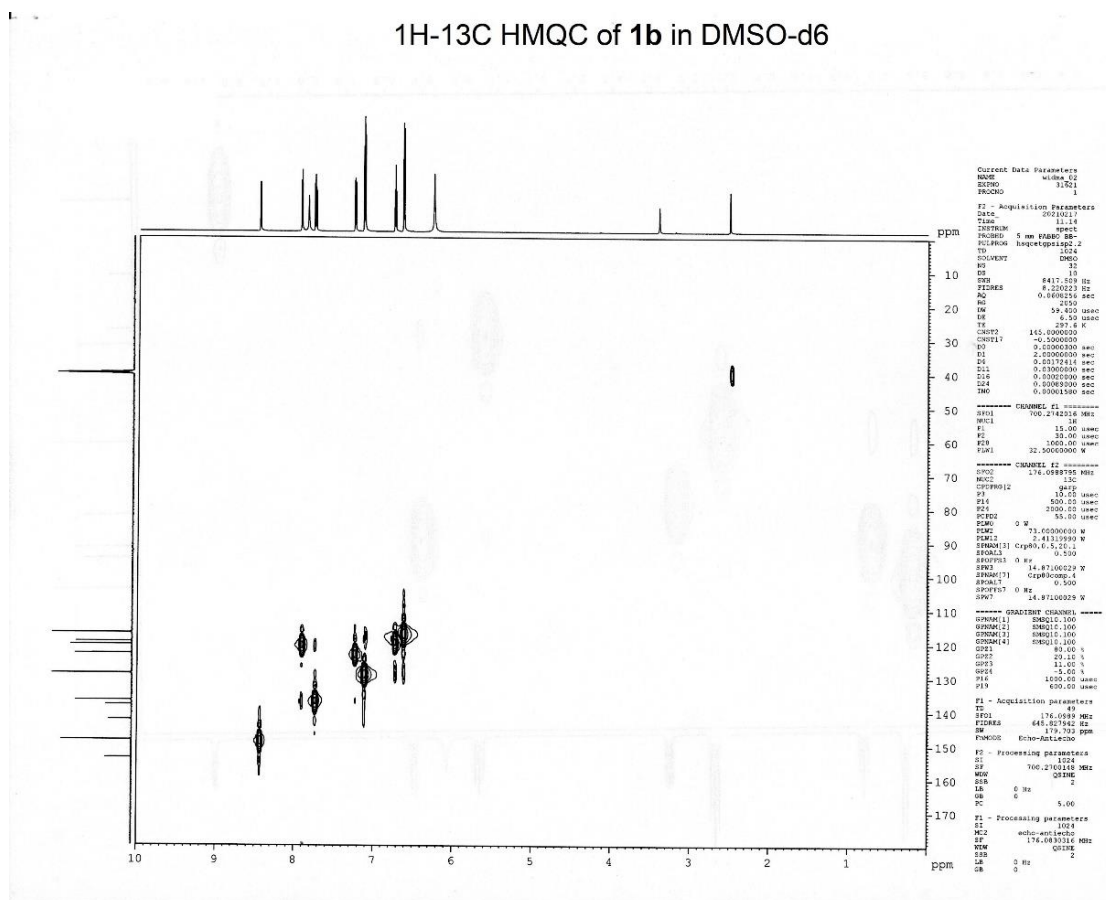

Figure S7.  $^1\text{H}$ - $^{13}\text{C}$  HMQC spectrum of **1b** (in DMSO- $d_6$ ), with enlarged fragment at the top

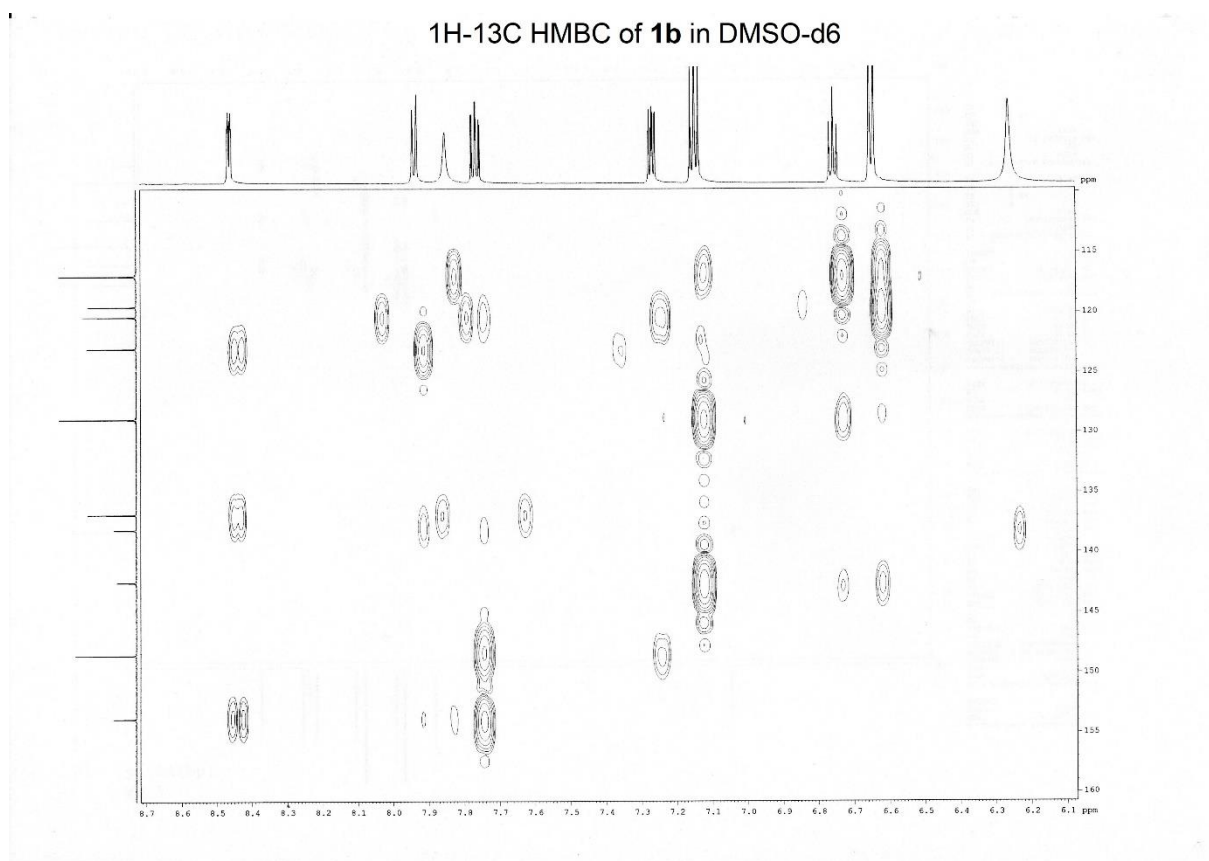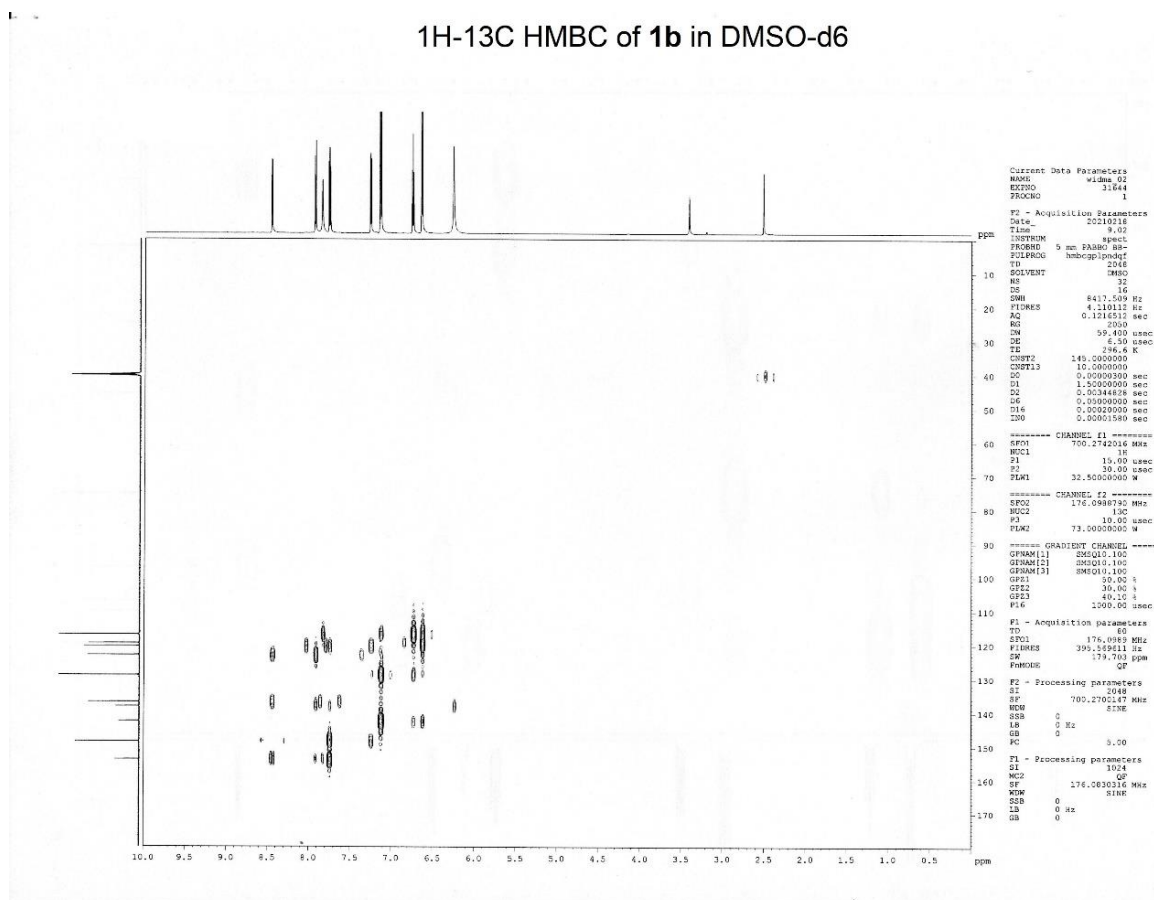

Figure S8. <sup>1</sup>H-<sup>13</sup>C HMBC spectrum of **1b** (in DMSO-d<sub>6</sub>), with enlarged fragment at the top

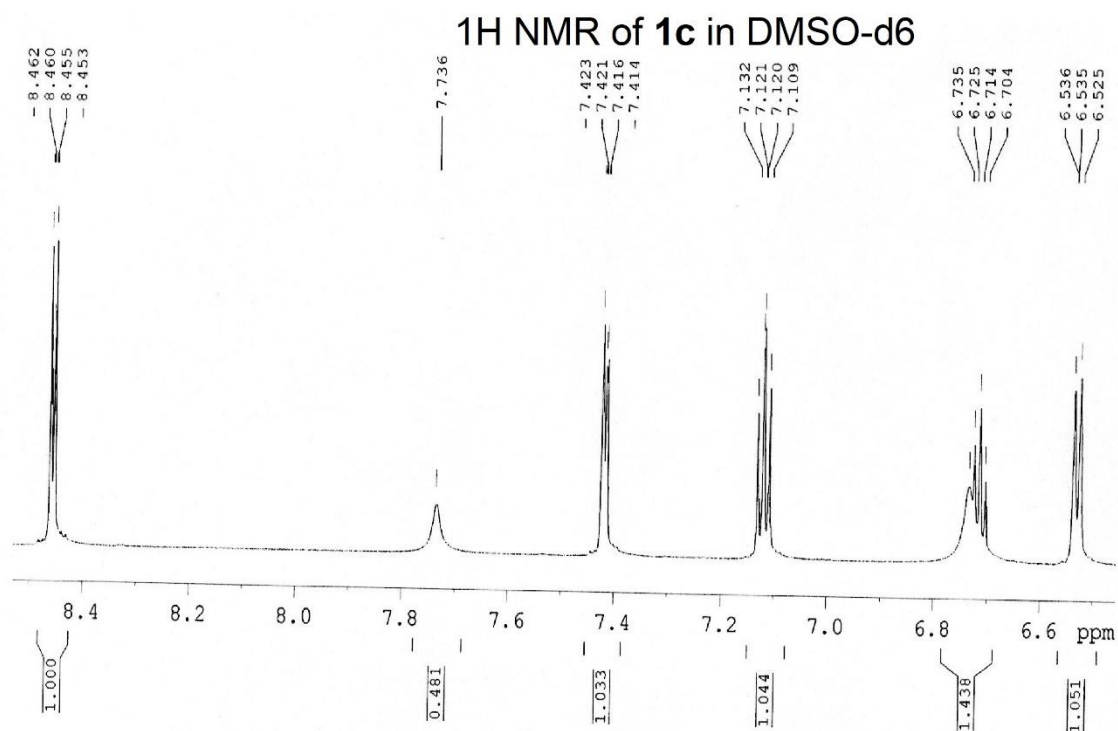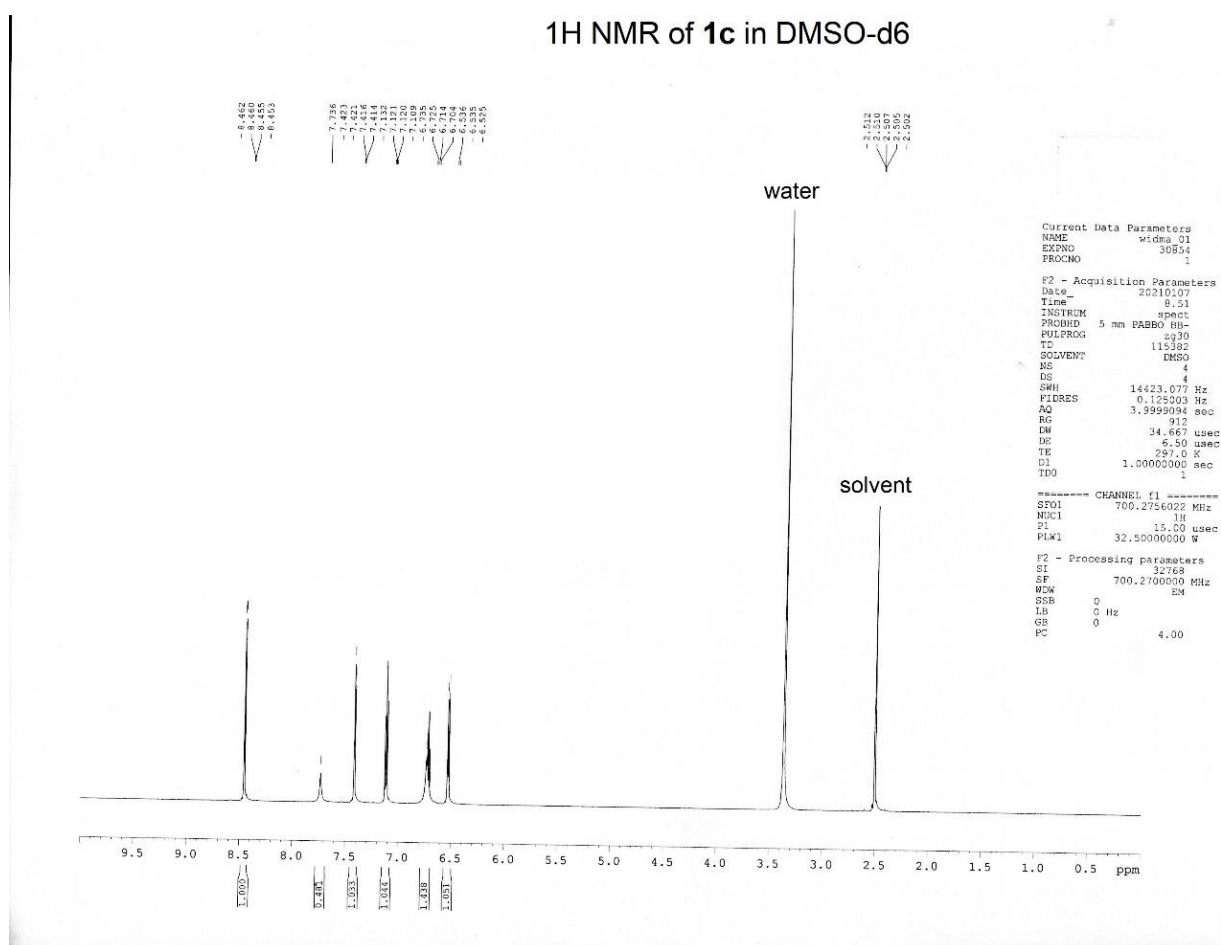

Figure S9. <sup>1</sup>H NMR spectrum of 1c (in DMSO-d<sub>6</sub>), with enlarged fragment at the top



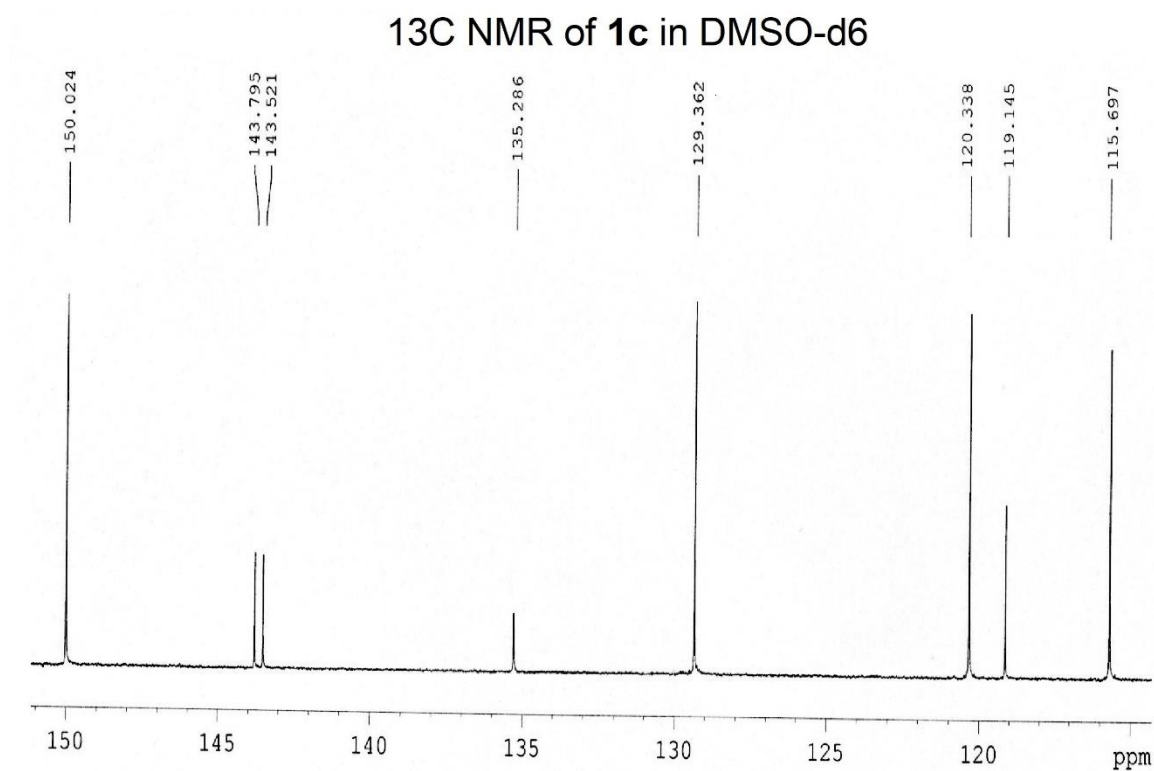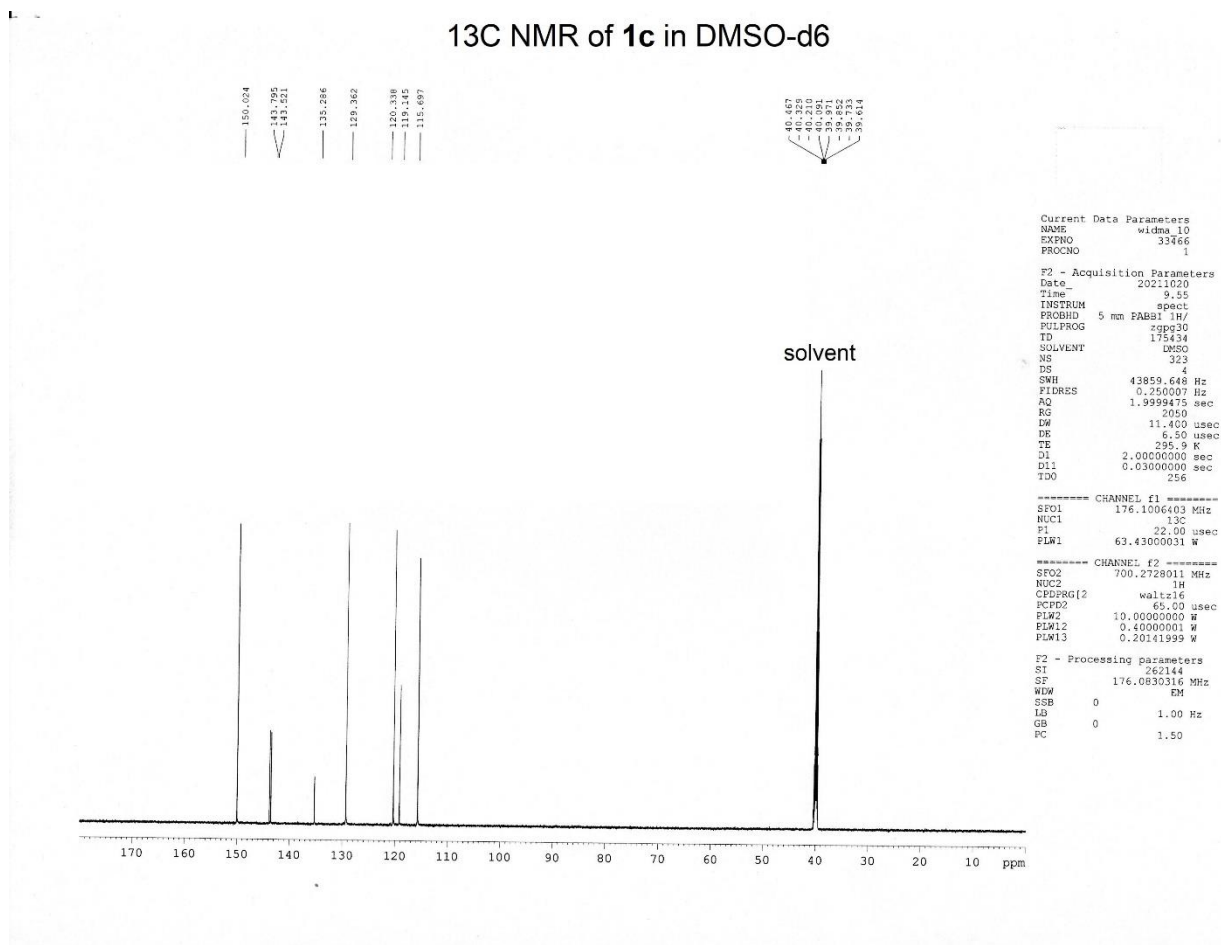

Figure S10.  $^{13}\text{C}$  NMR spectrum of **1c** (in DMSO- $d_6$ ), with enlarged fragment at the top

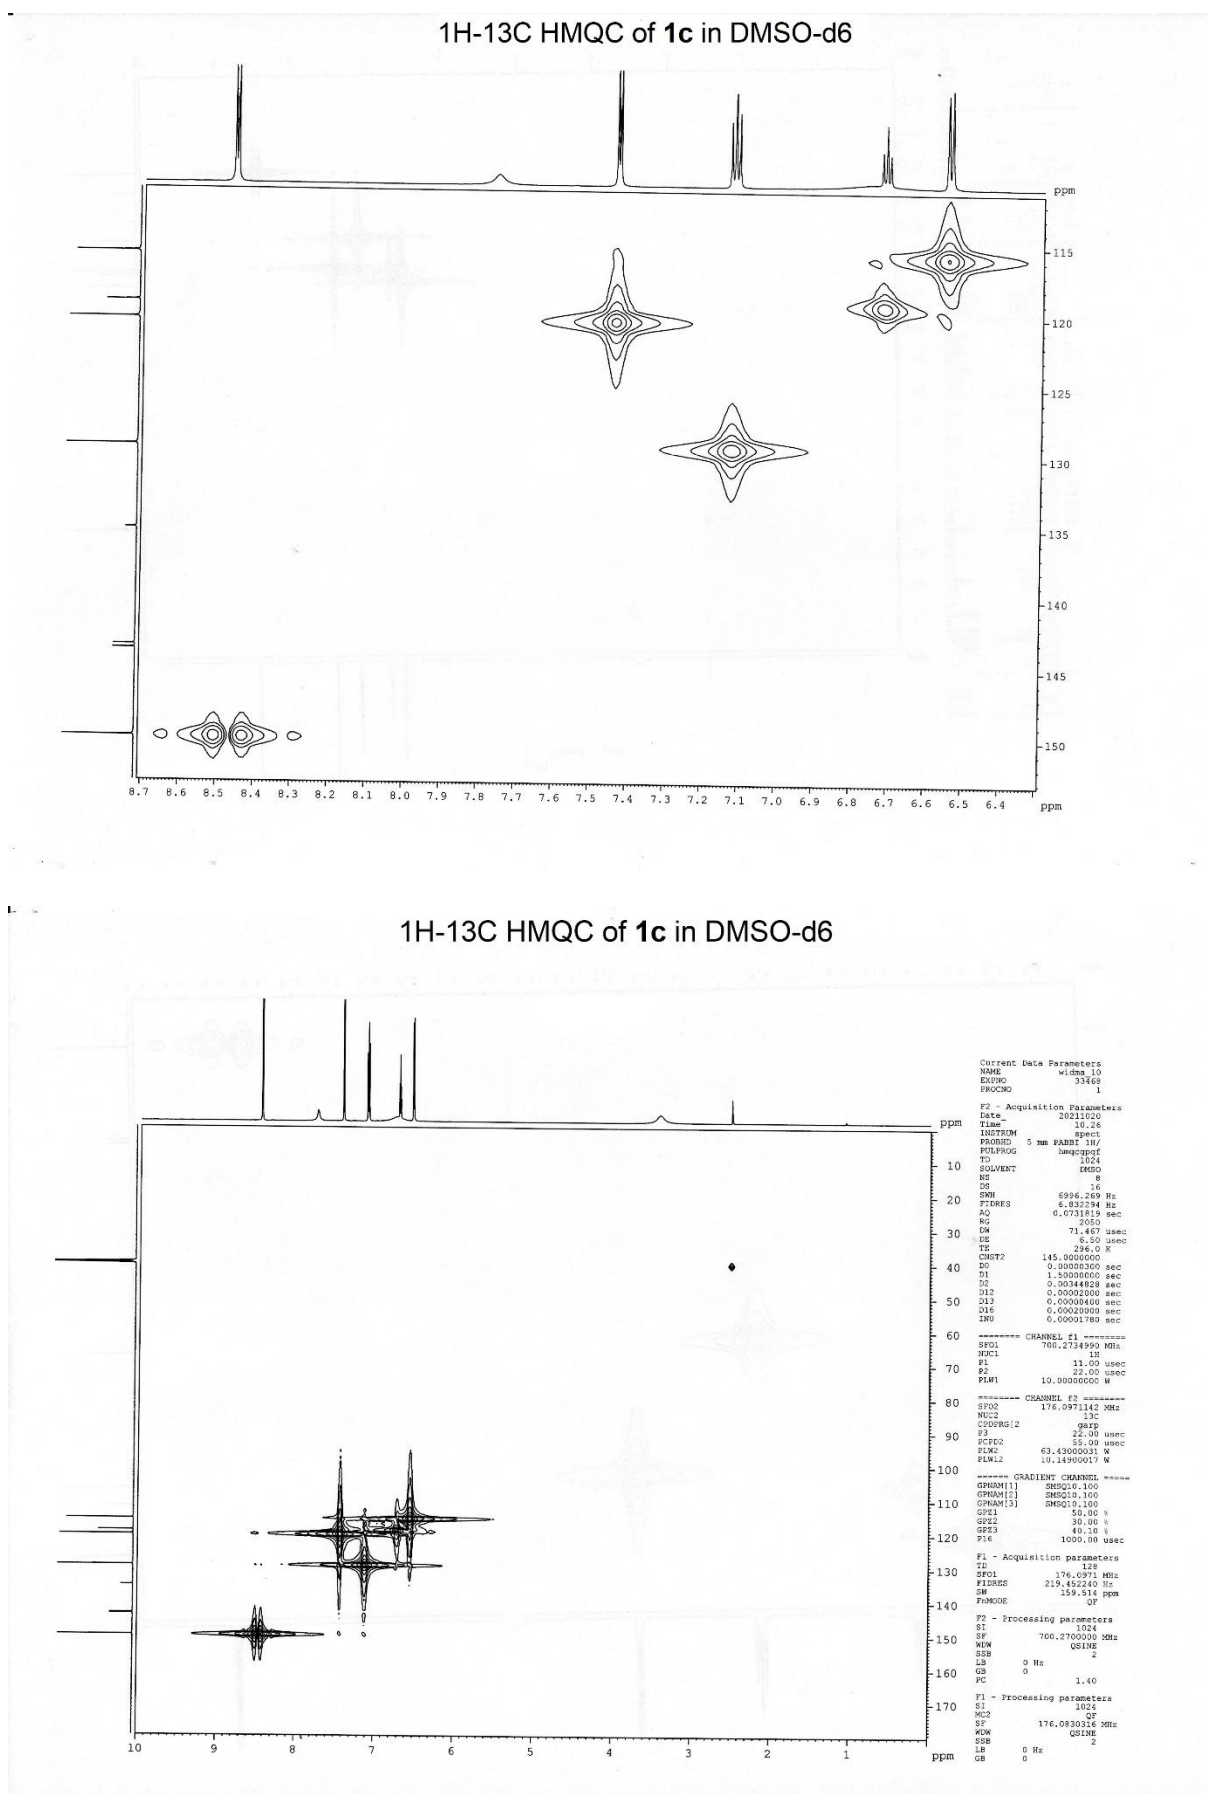

Figure S11.  $^1\text{H}$ - $^{13}\text{C}$  HMQC spectrum of **1c** (in DMSO- $d_6$ ), with enlarged fragment at the top

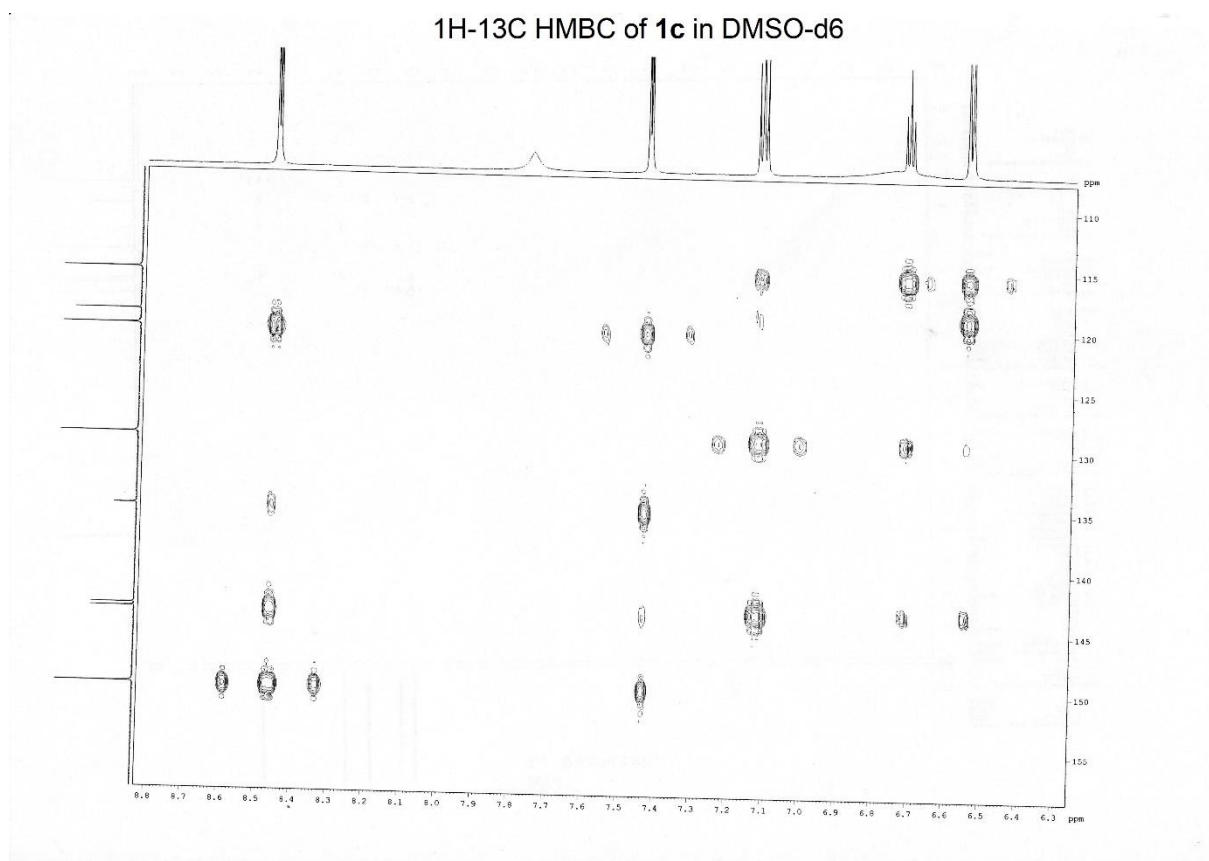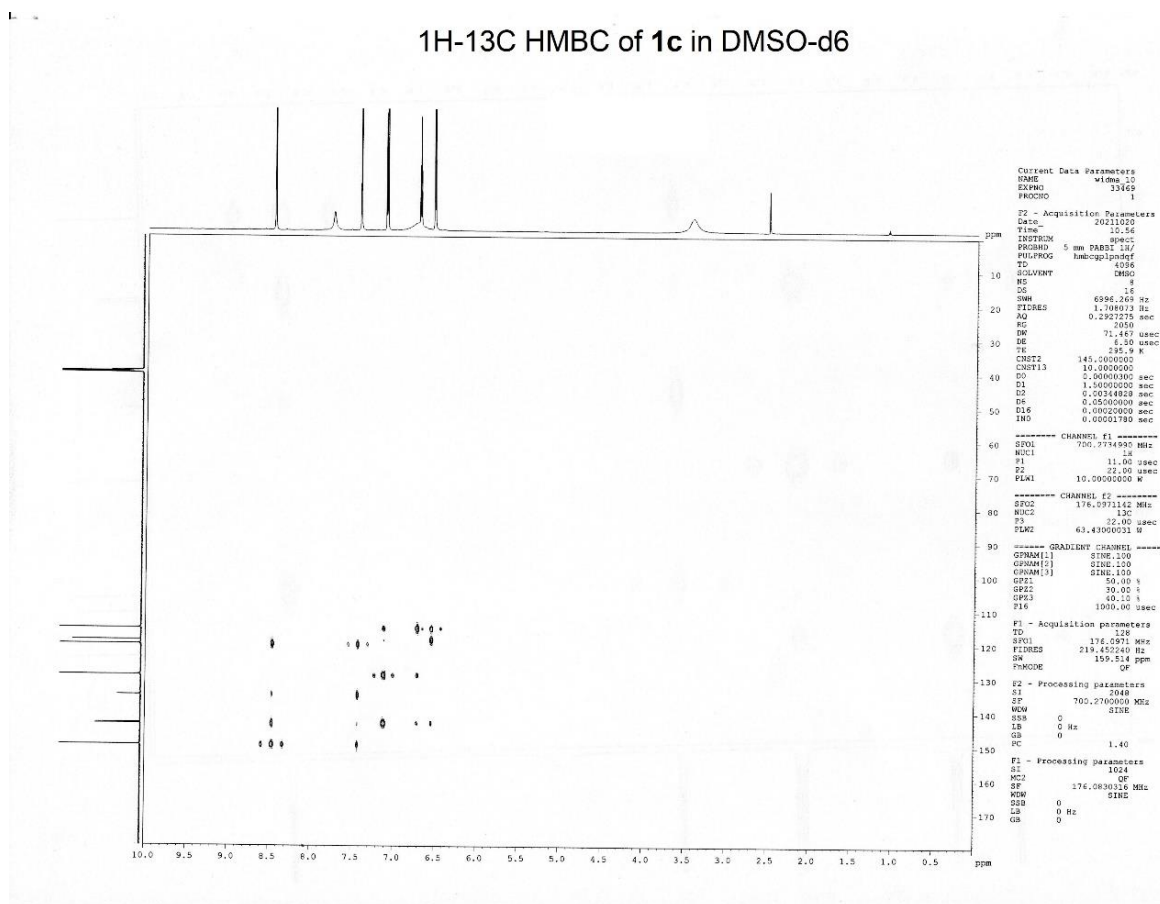

Figure S12.  $^1\text{H}$ - $^{13}\text{C}$  HMBC spectrum of **1c** (in DMSO- $d_6$ ), with enlarged fragment at the top



# **<sup>13</sup>C NMR of **1d** in DMSO-d<sub>6</sub>**

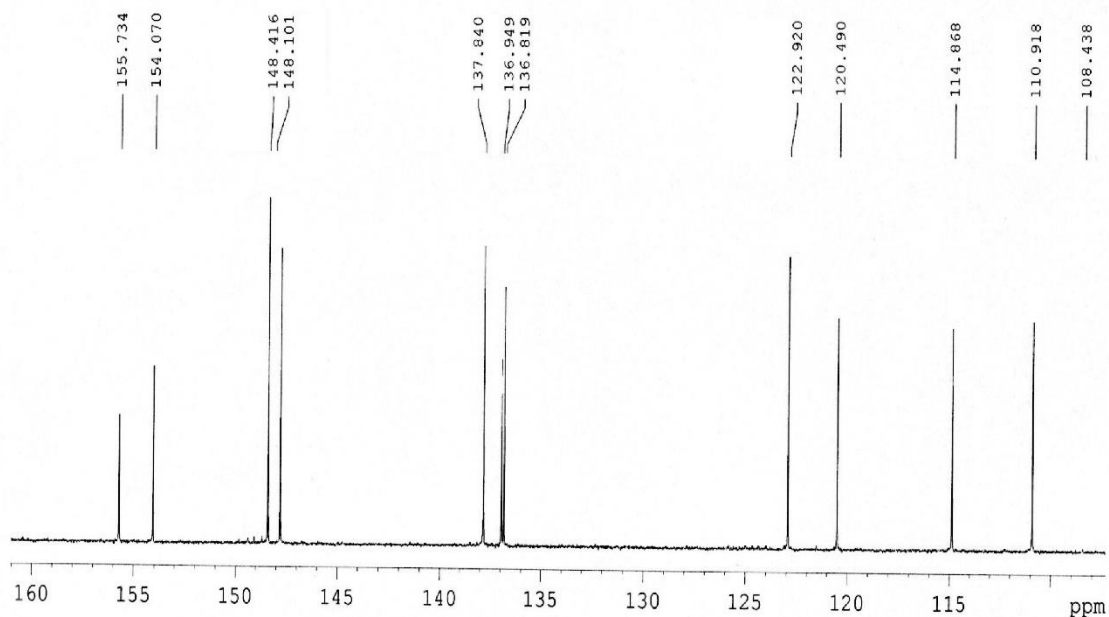

# **<sup>13</sup>C NMR of **1d** in DMSO-d<sub>6</sub>**

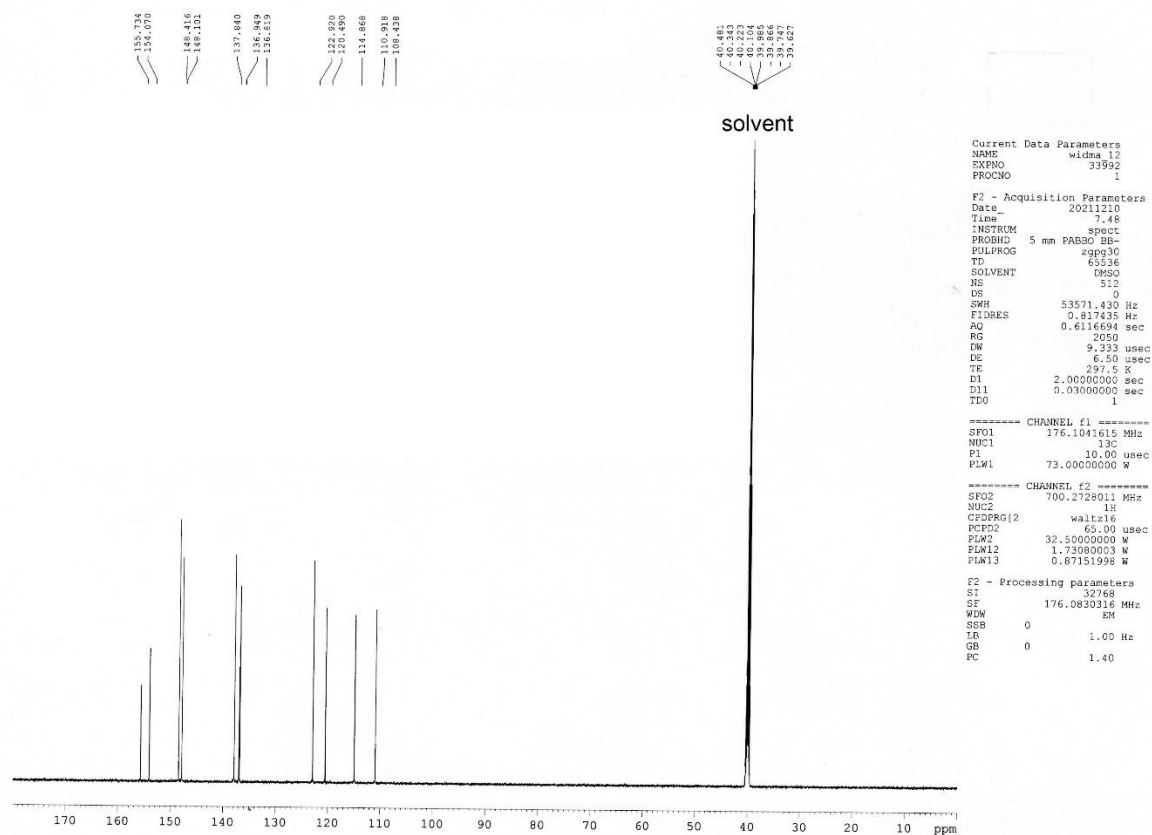

Figure S14. <sup>13</sup>C NMR spectrum of **1d** (in DMSO-d<sub>6</sub>), with enlarged fragment at the top



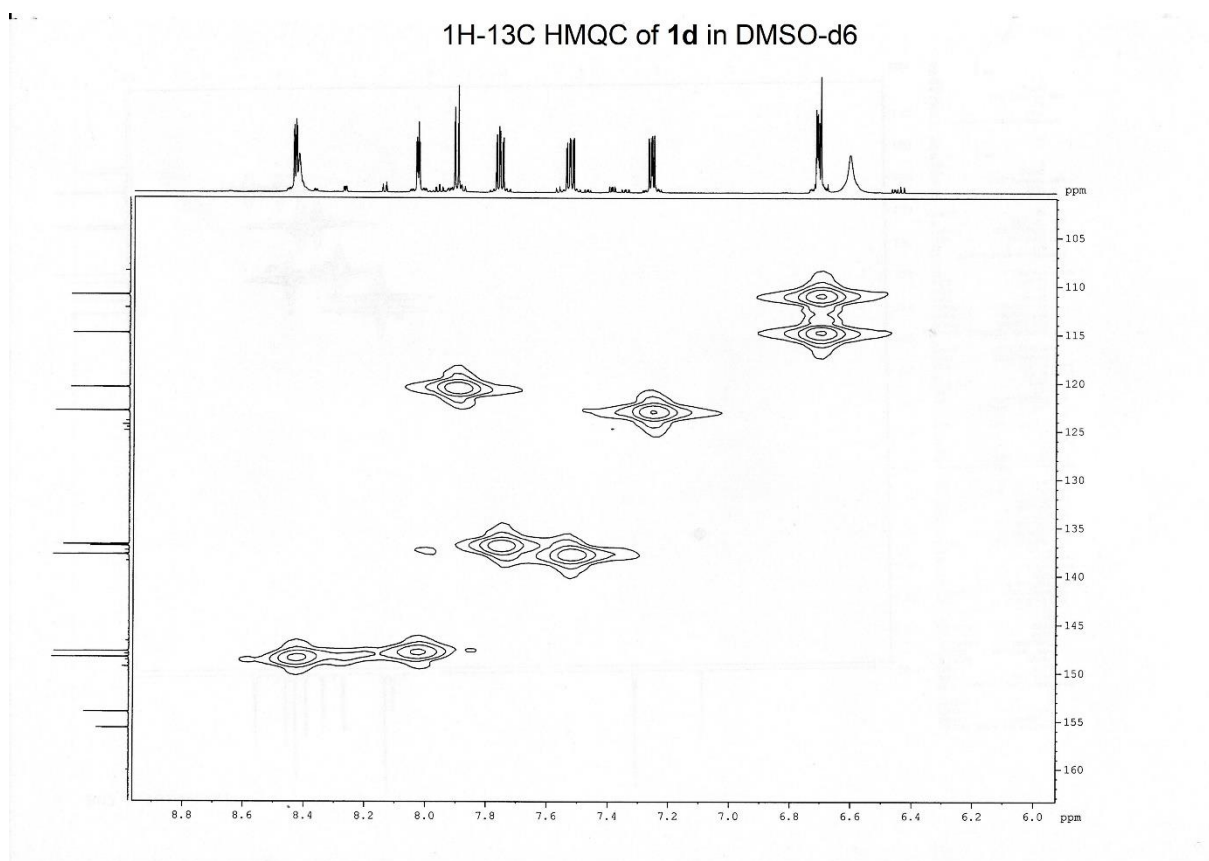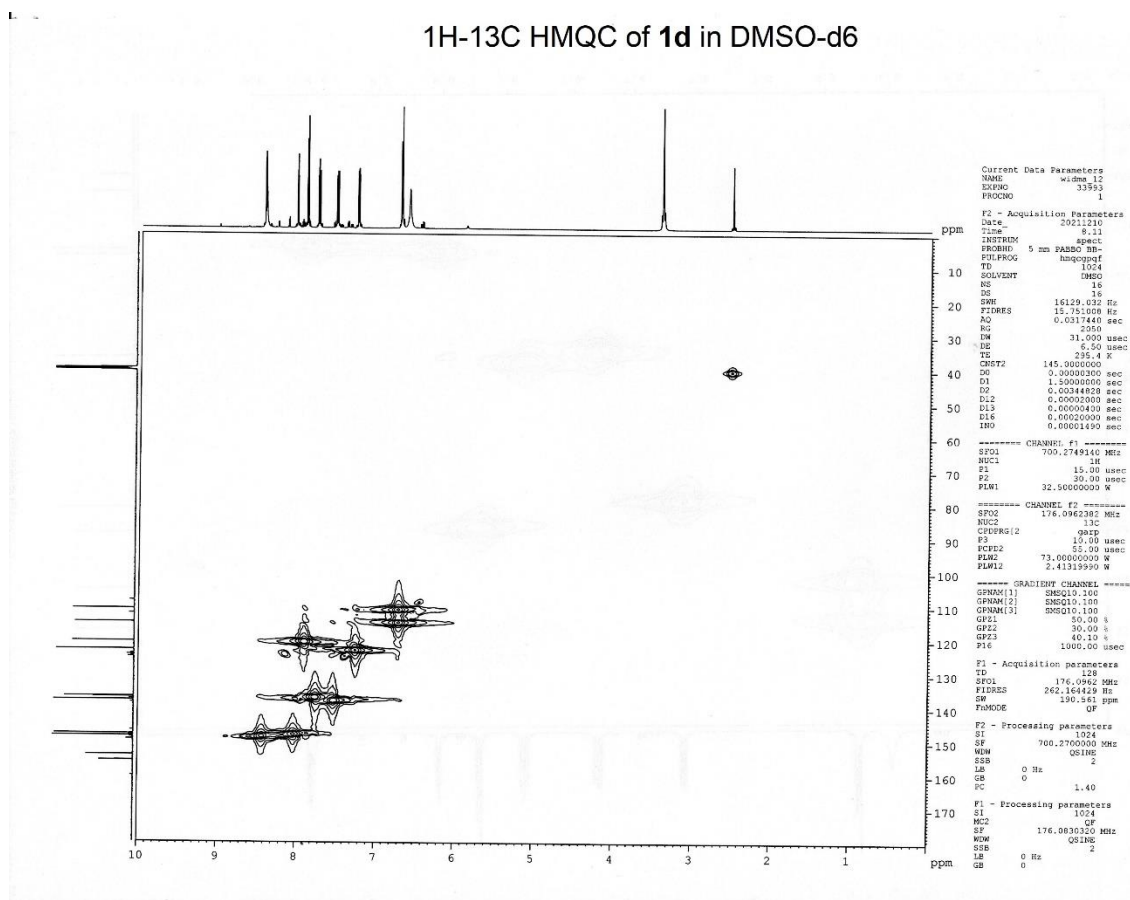

Figure S15.  $^1\text{H}$ - $^{13}\text{C}$  HMQC spectrum of **1d** (in DMSO- $d_6$ ), with enlarged fragment at the top

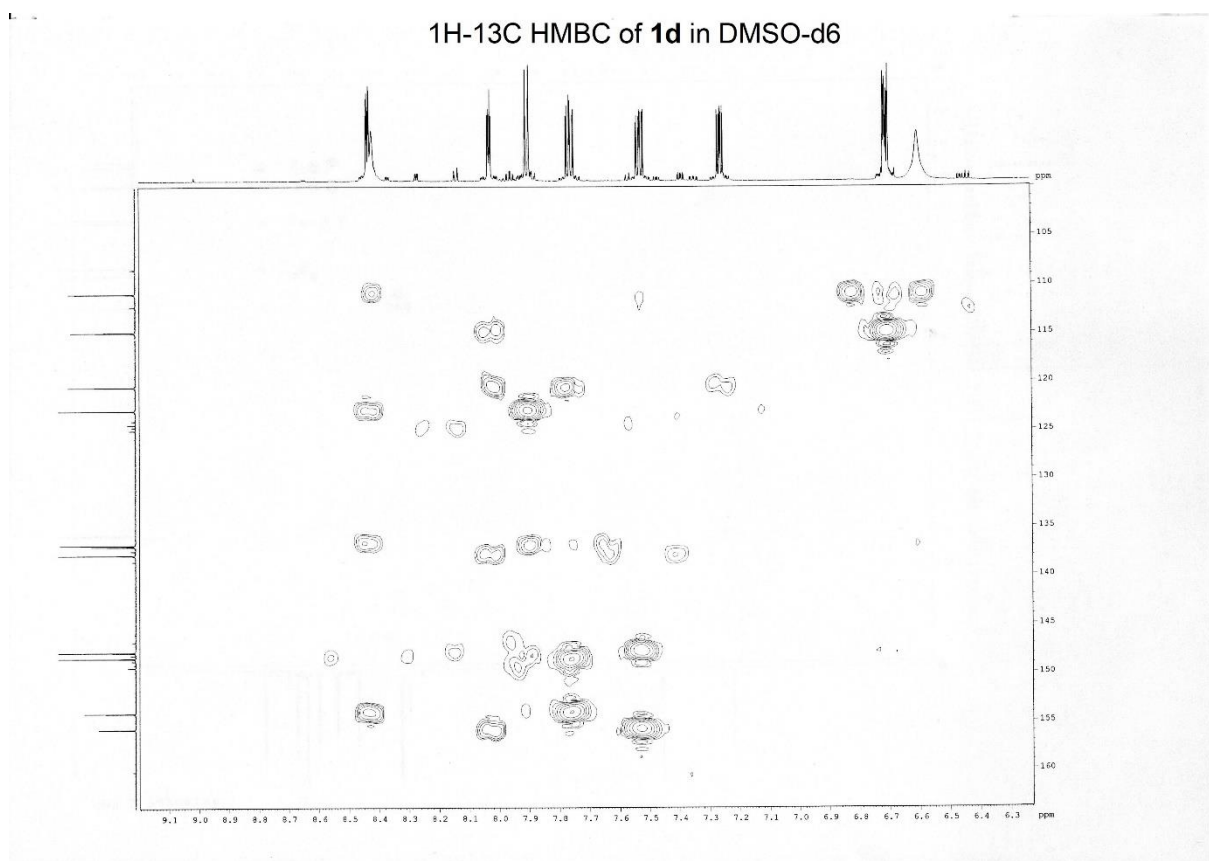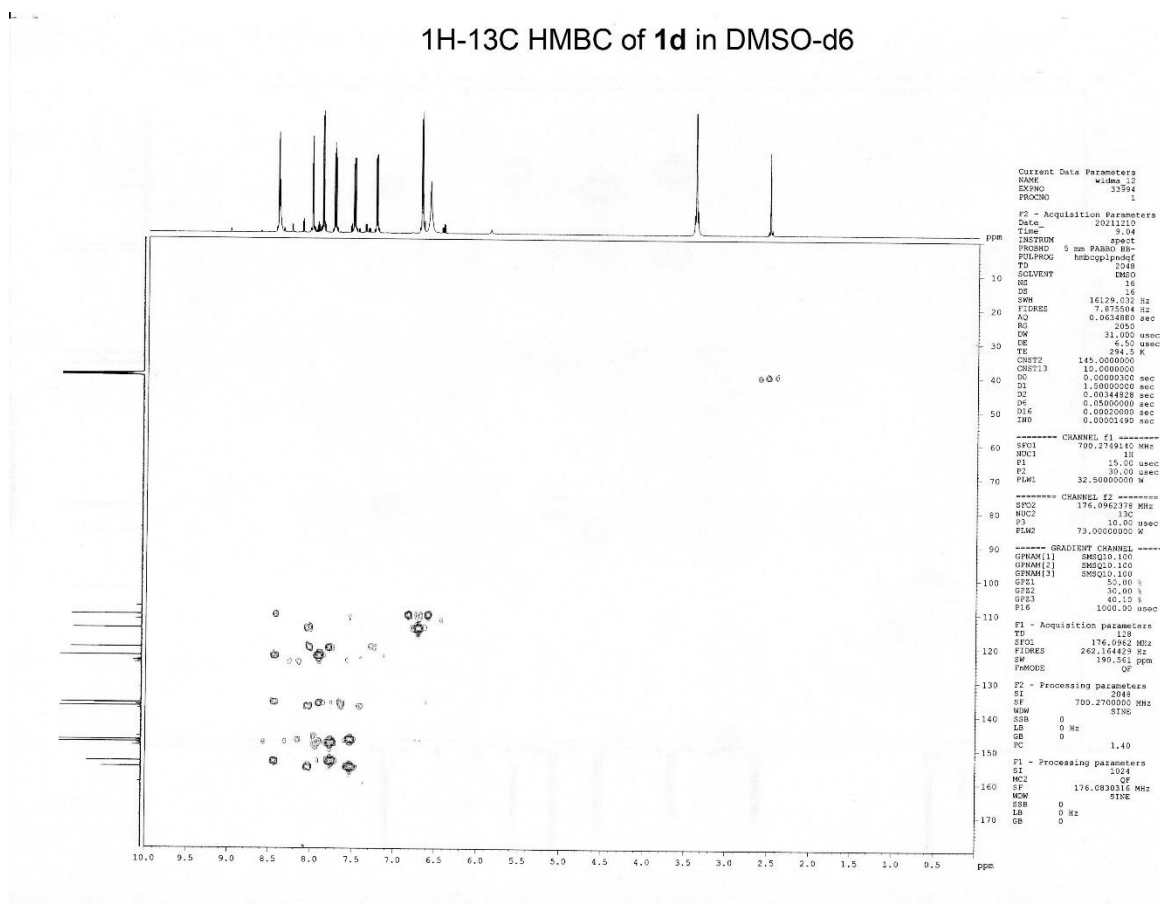

Figure S16.  $^1\text{H}$ - $^{13}\text{C}$  HMBC spectrum of **1d** (in DMSO- $d_6$ ), with enlarged fragment at the top

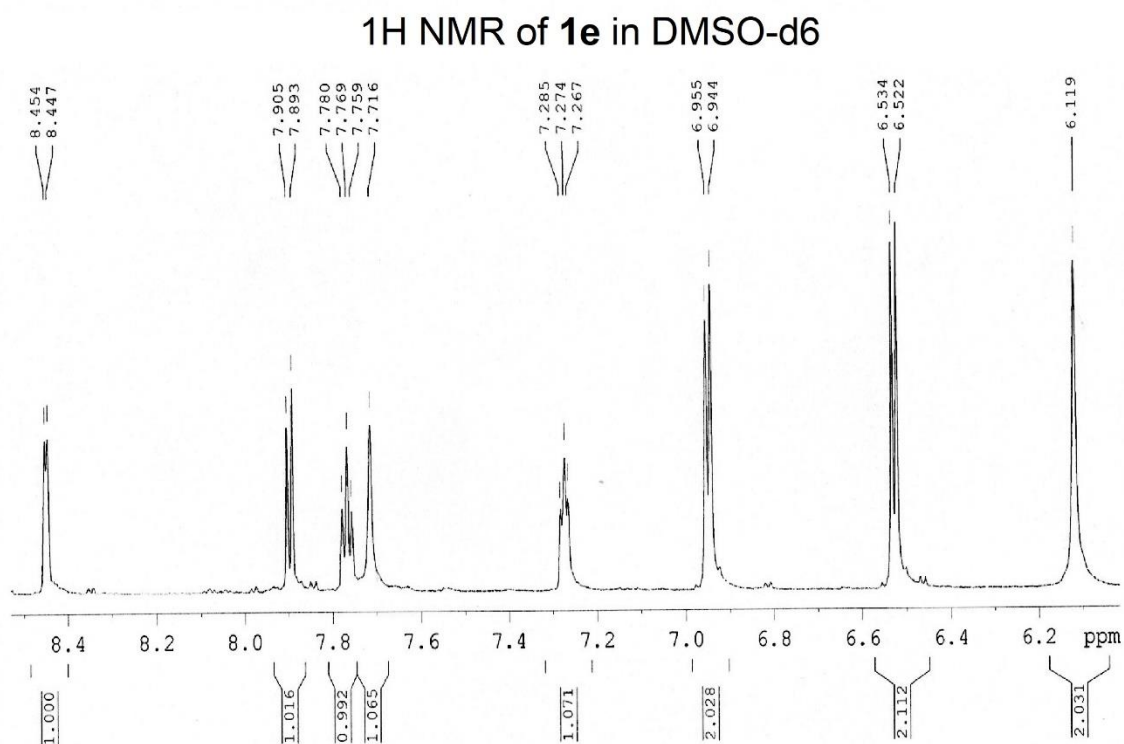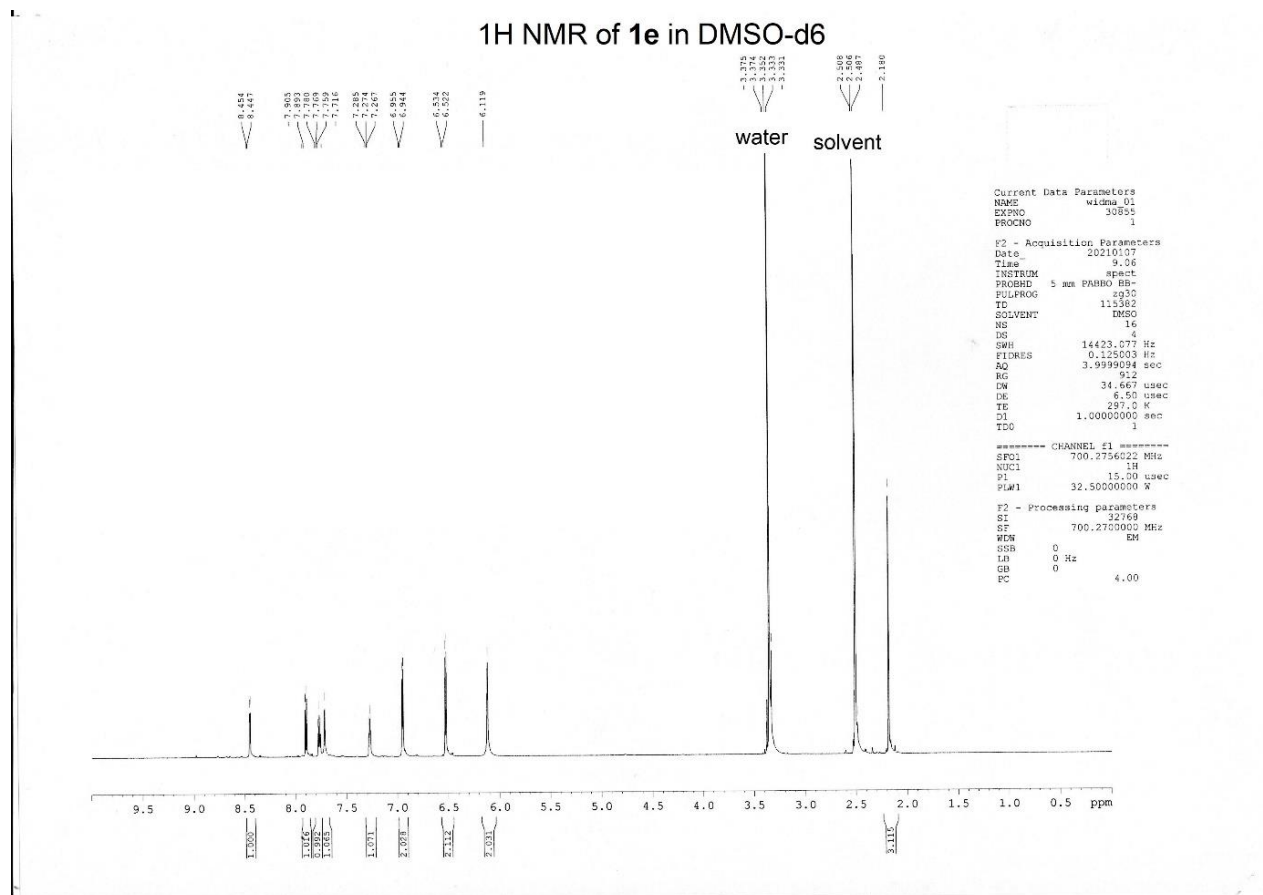

Figure S17. <sup>1</sup>H NMR spectrum of **1e** (in DMSO-d<sub>6</sub>), with enlarged fragment at the top



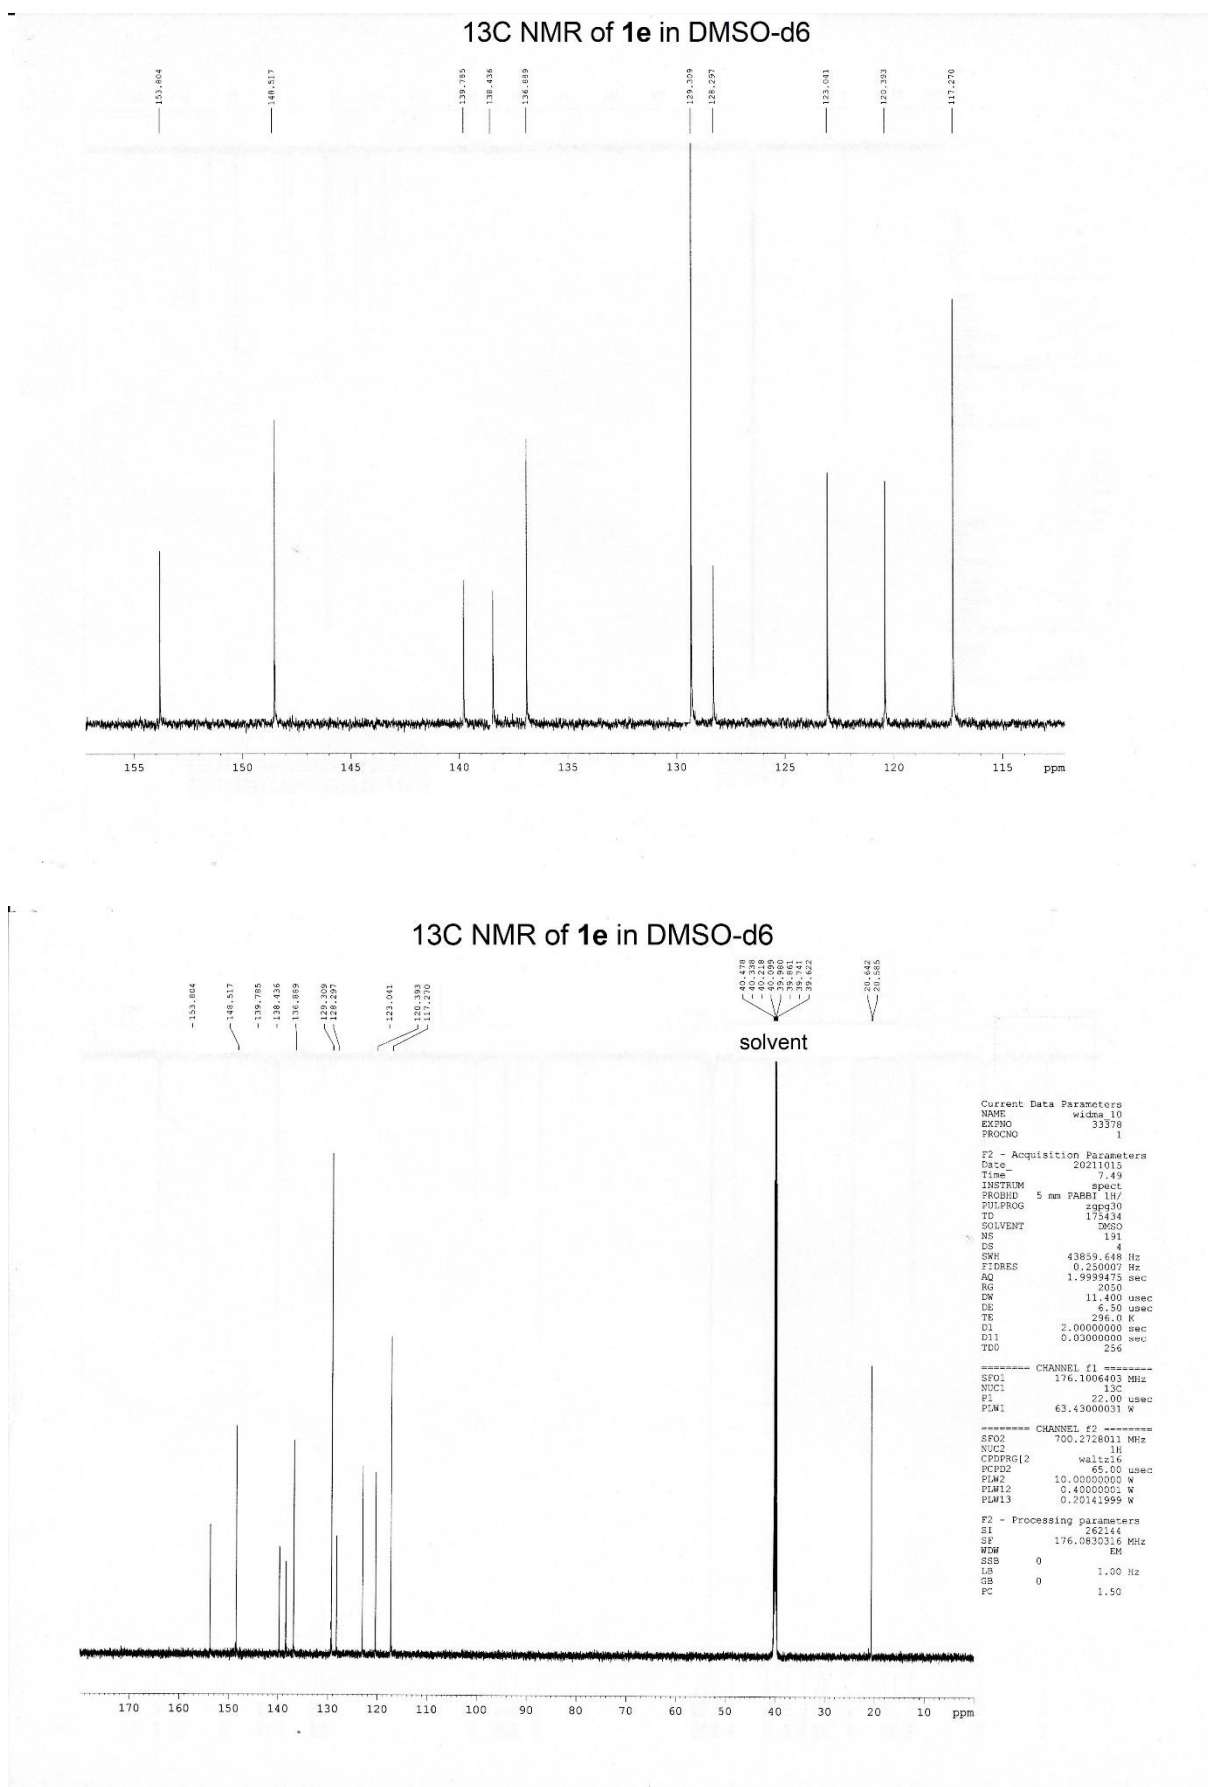

Figure S18. <sup>13</sup>C NMR spectrum of **1e** (in DMSO-d<sub>6</sub>), with enlarged fragment at the top

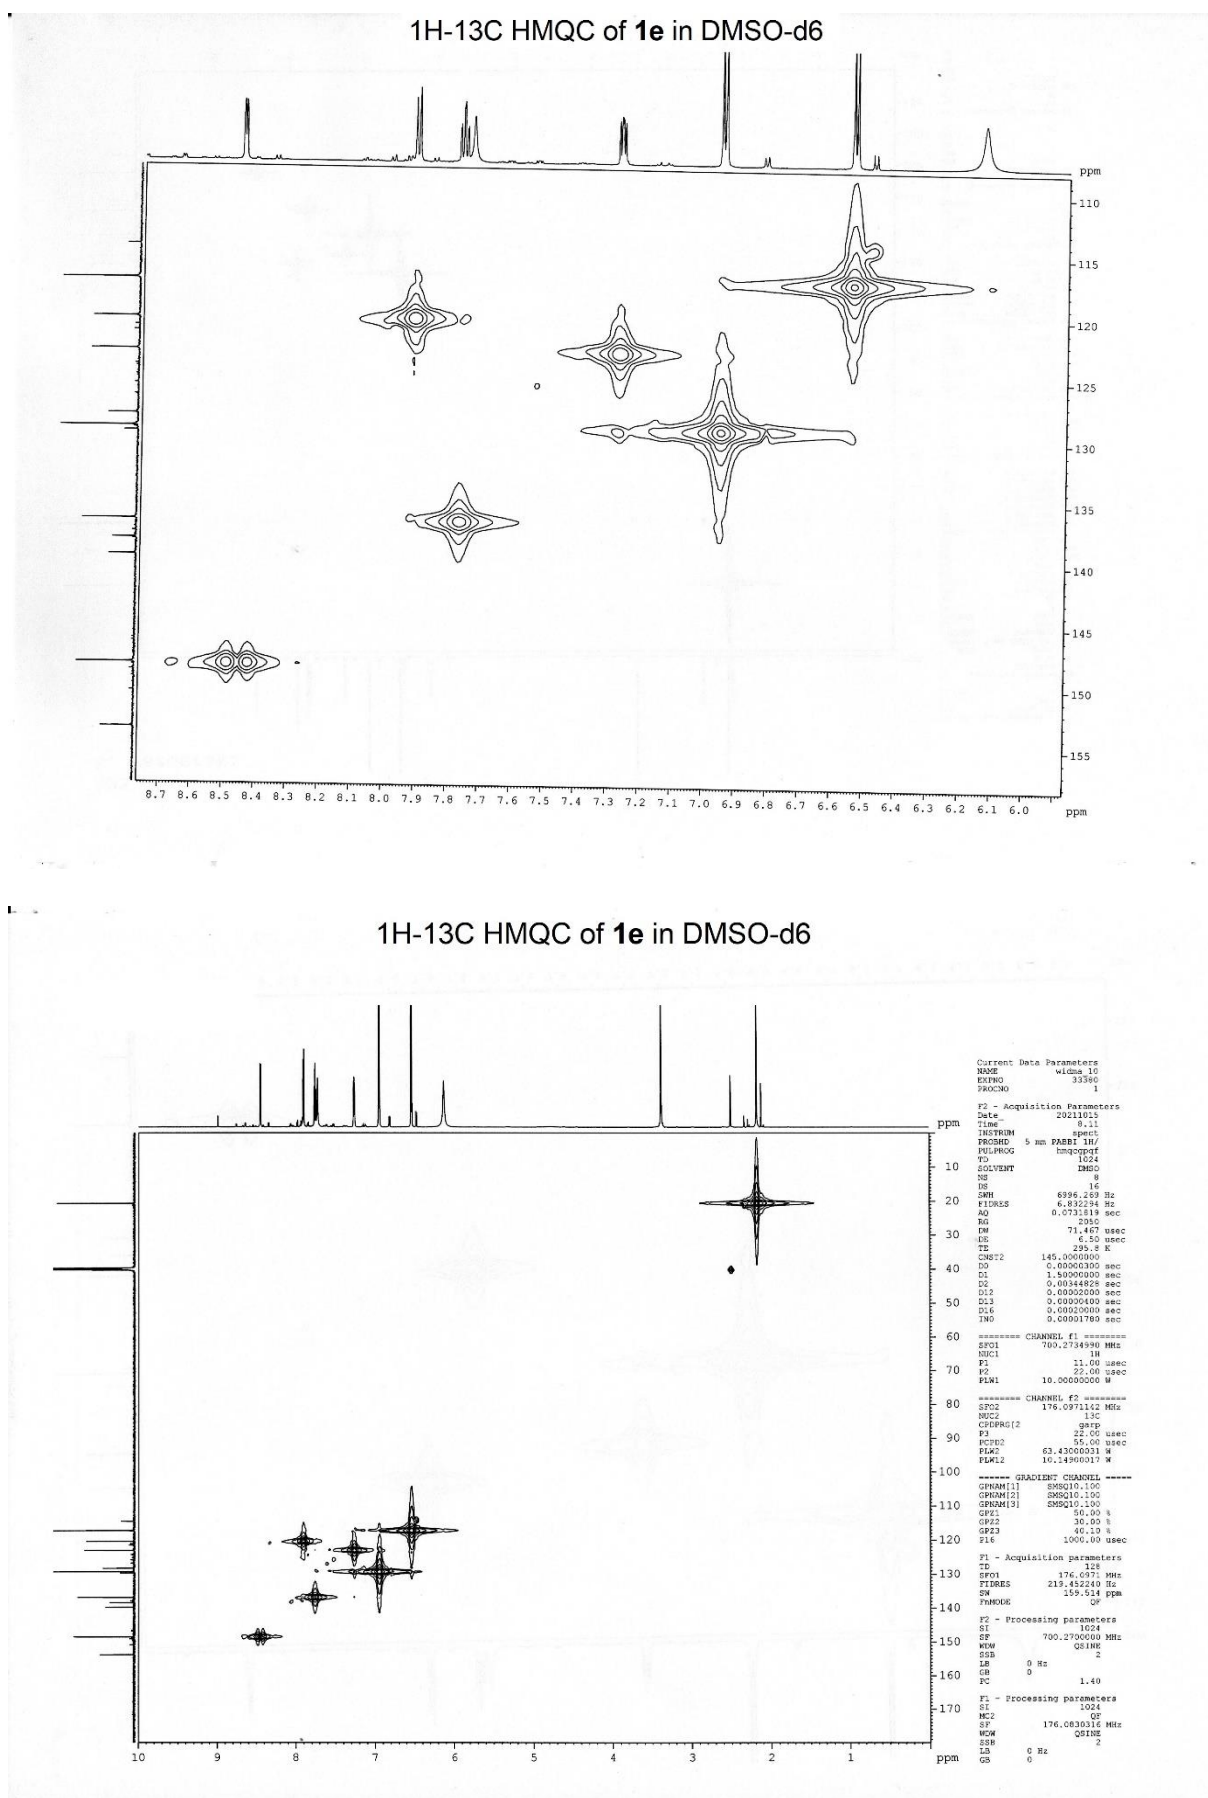

Figure S19.  $^1\text{H}$ - $^{13}\text{C}$  HMQC spectrum of **1e** (in DMSO- $d_6$ ), with enlarged fragment at the top

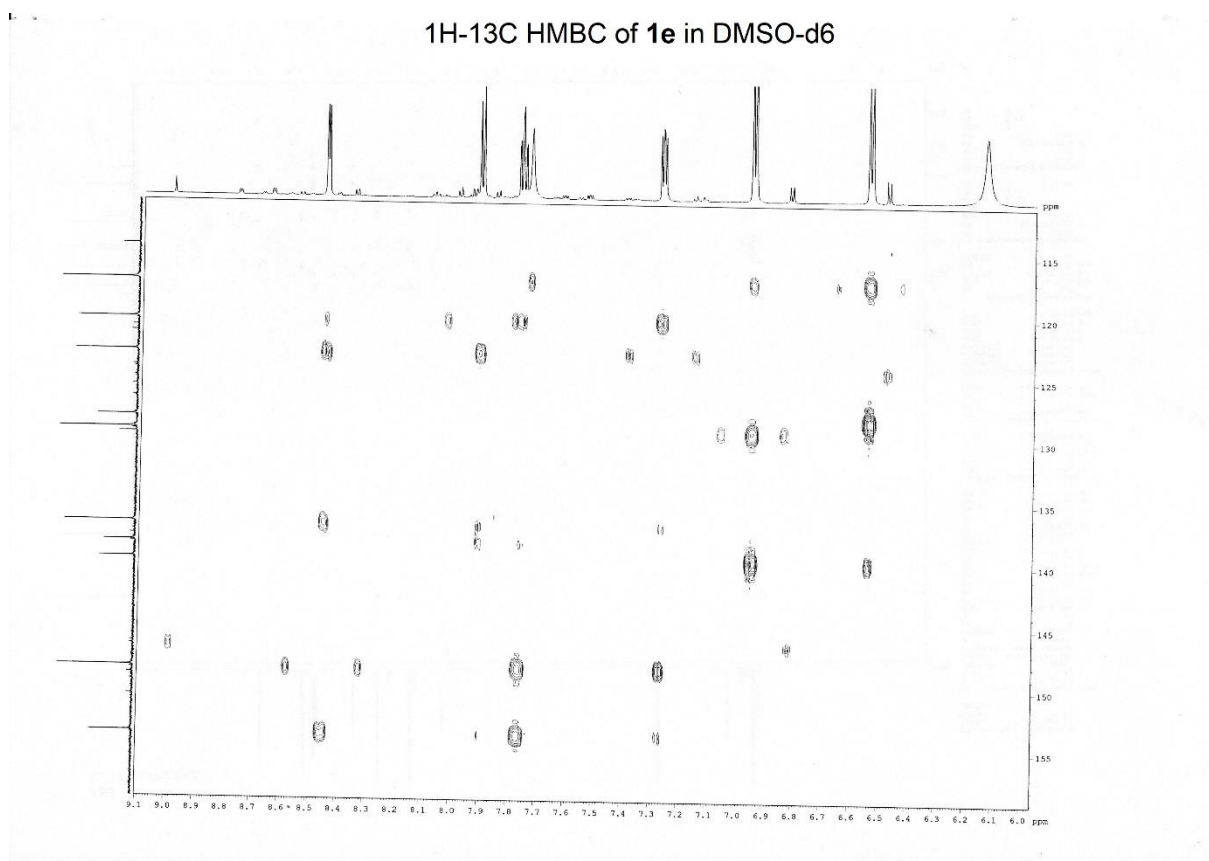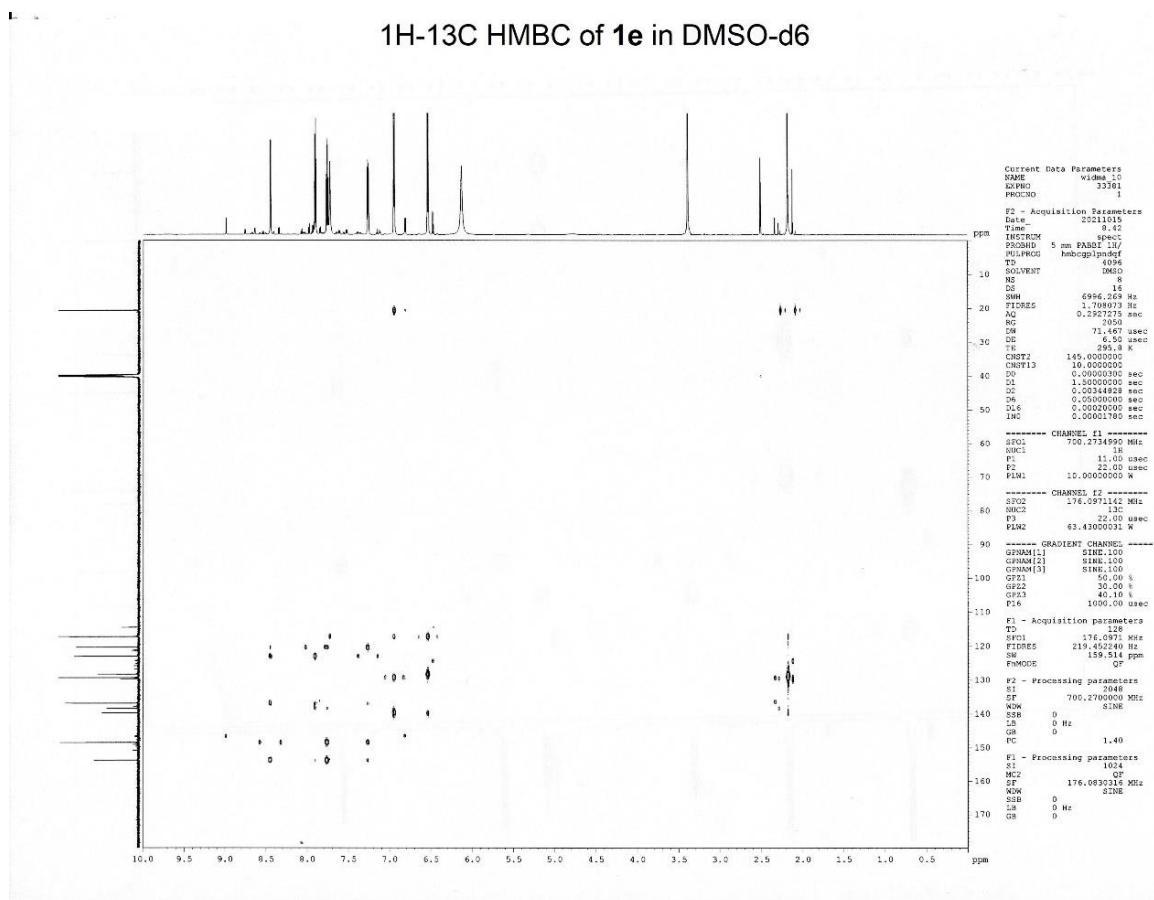

Figure S20.  $^1\text{H}$ - $^{13}\text{C}$  HMBC spectrum of **1e** (in DMSO- $d_6$ ), with enlarged fragment at the top

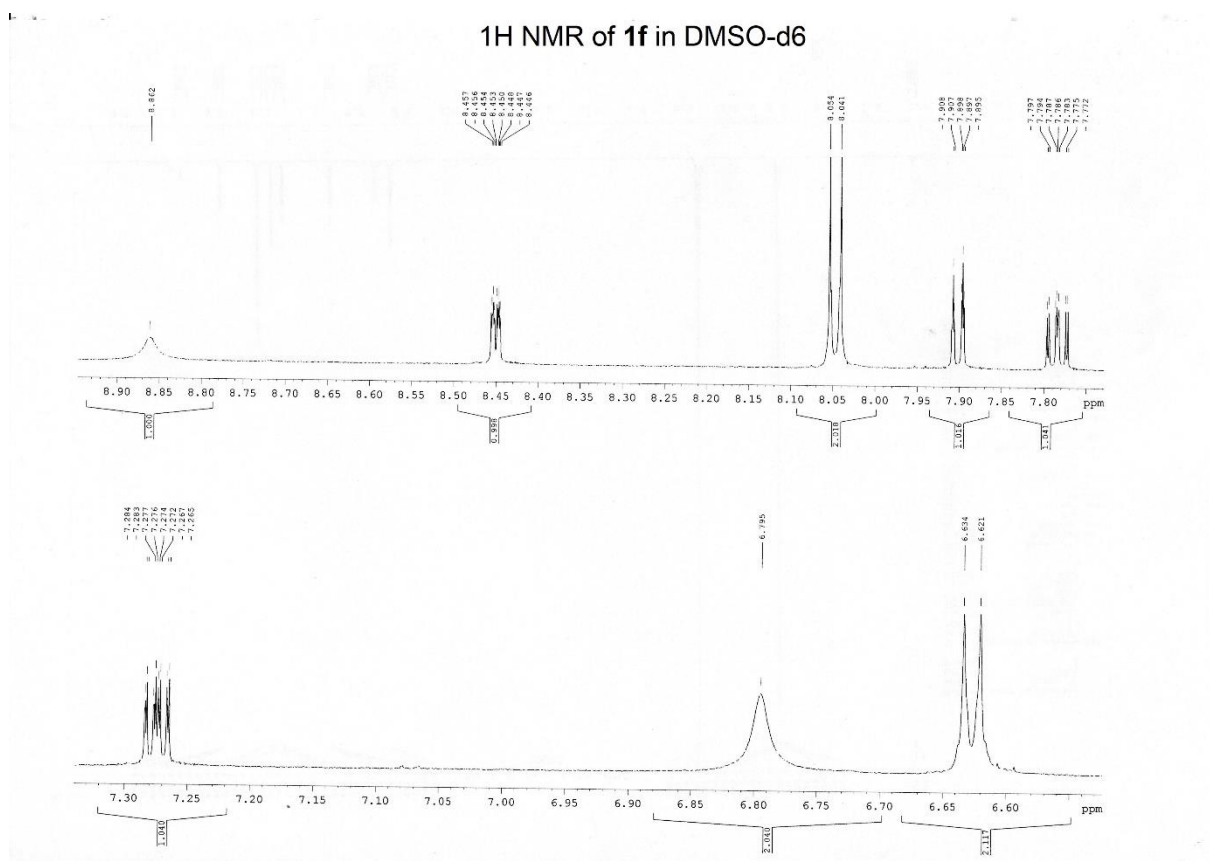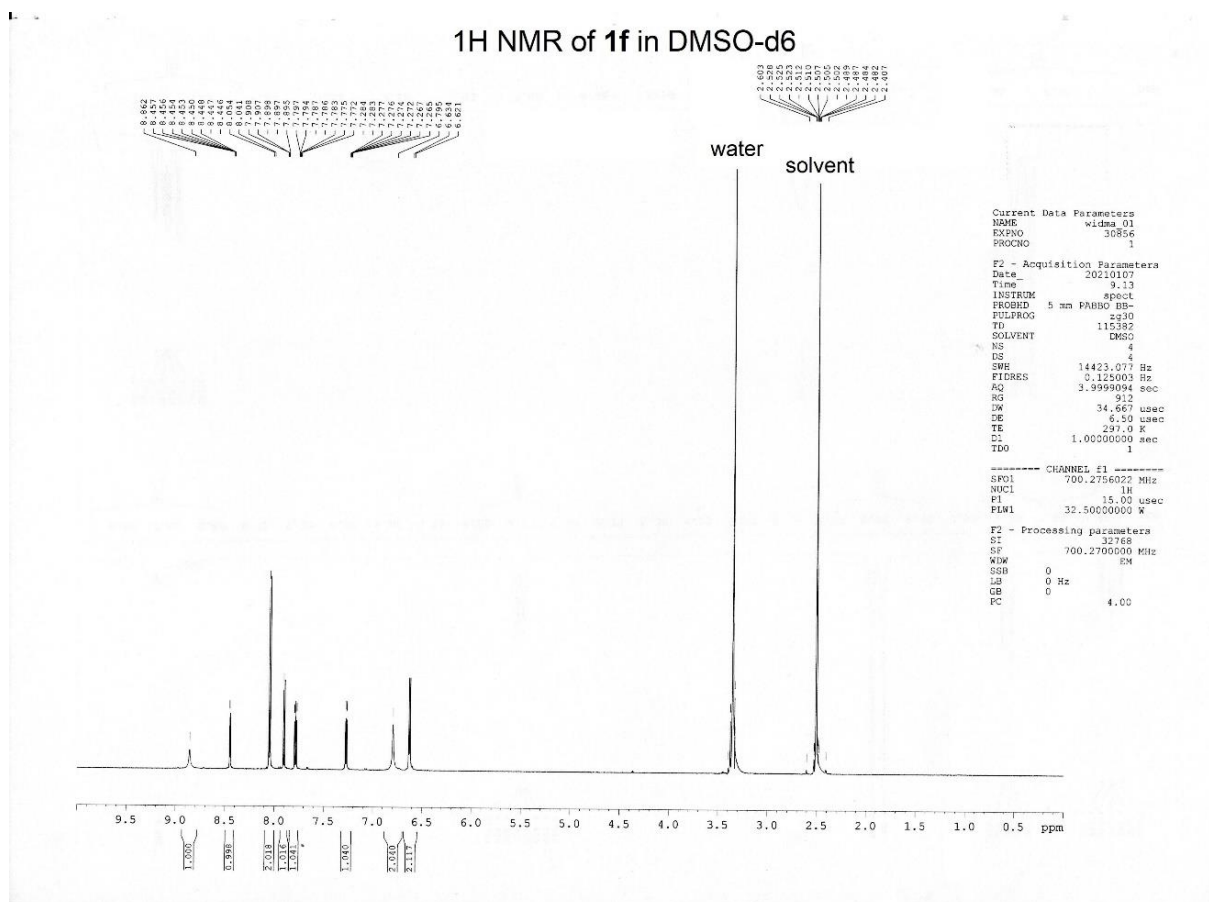

Figure S21. <sup>1</sup>H NMR spectrum of **1f** (in DMSO-d<sub>6</sub>), with enlarged fragment at the top

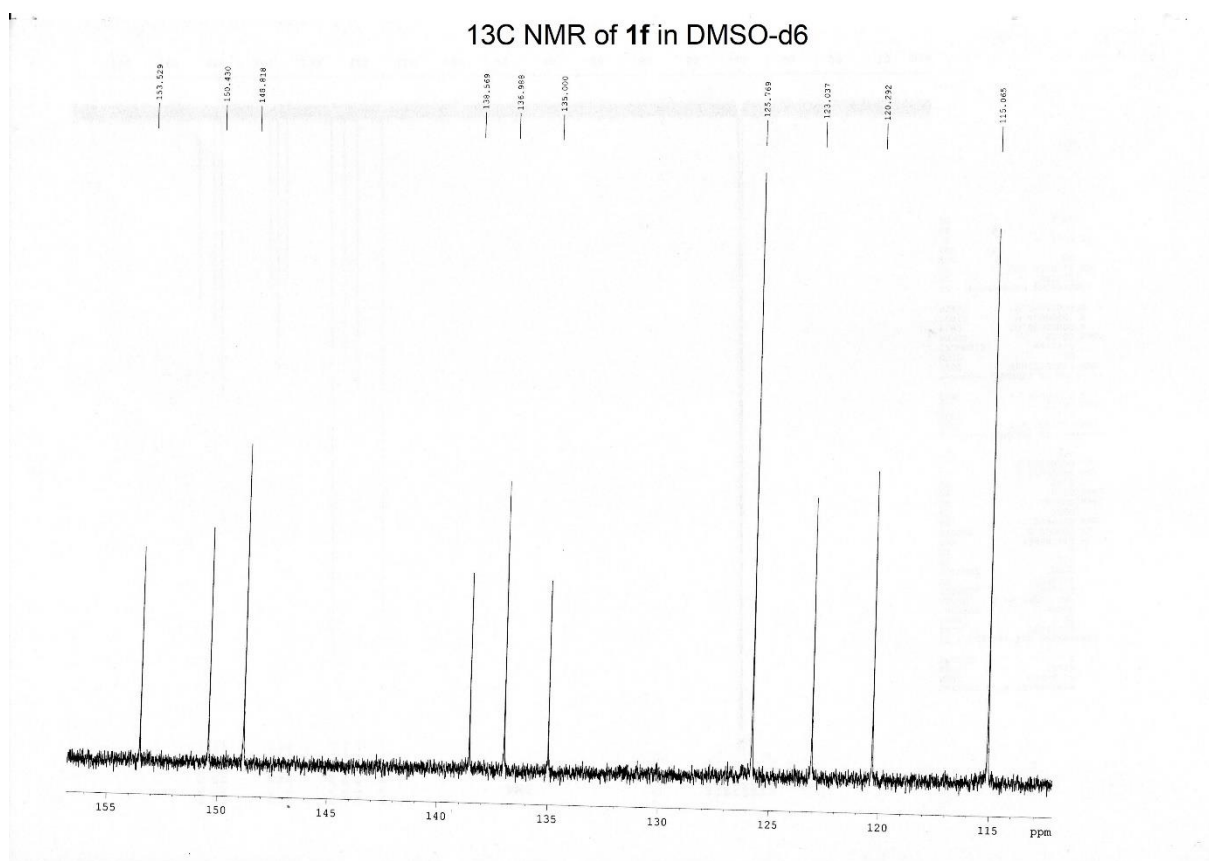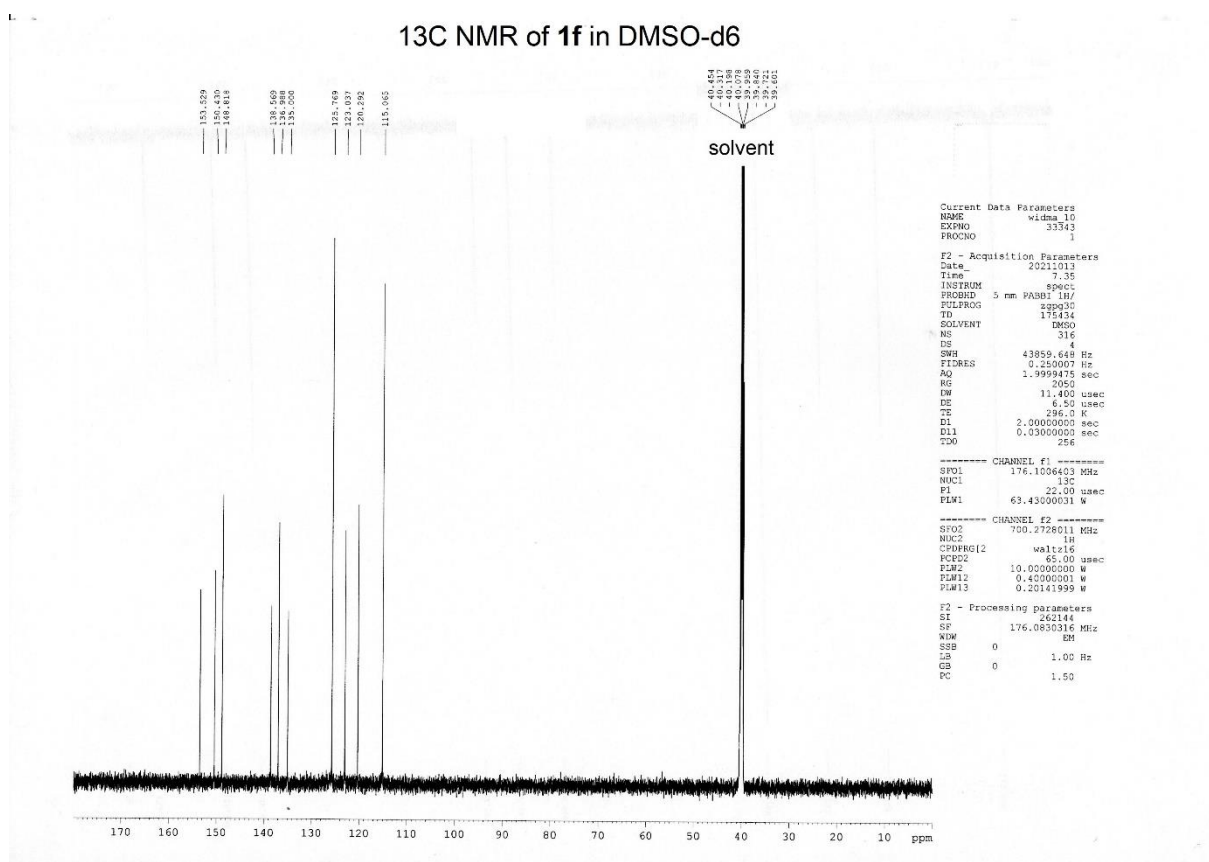

Figure S22.  $^{13}\text{C}$  NMR spectrum of **1f** (in DMSO- $d_6$ ), with enlarged fragment at the top





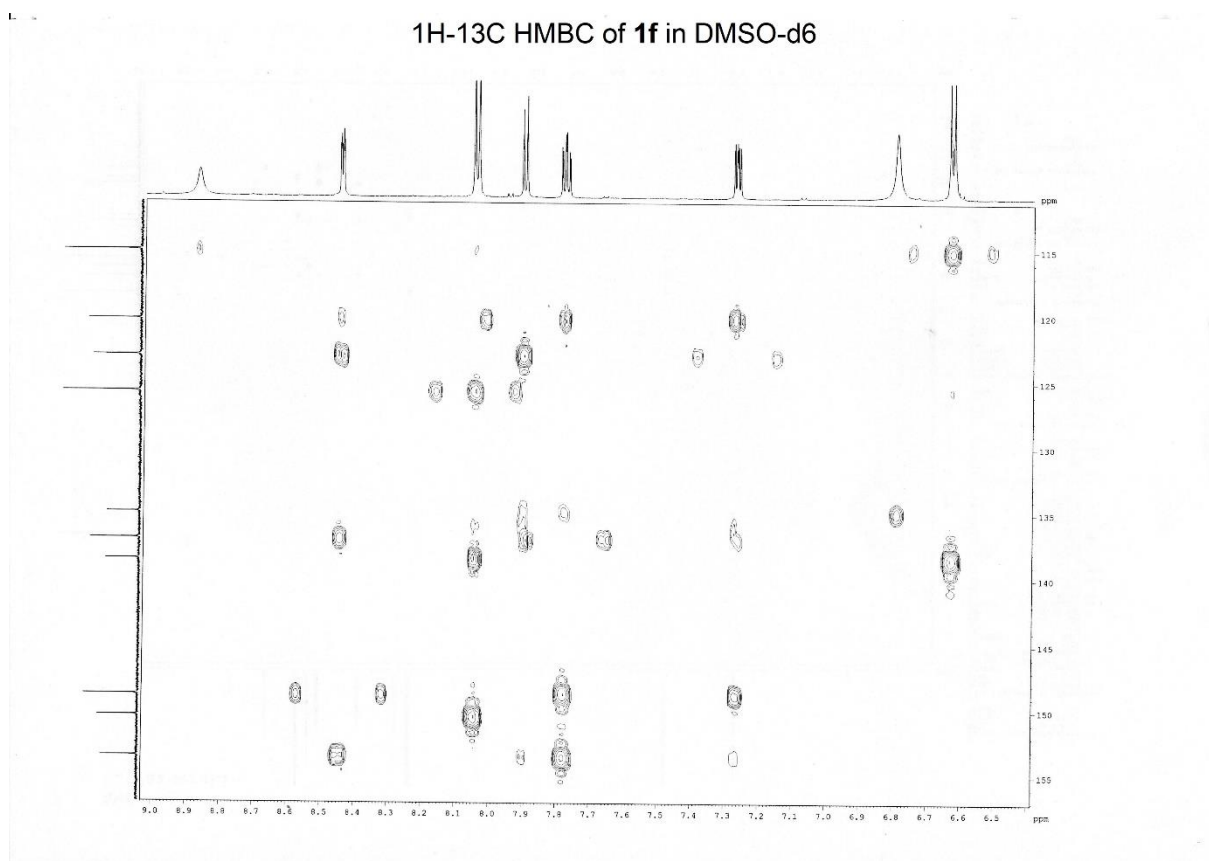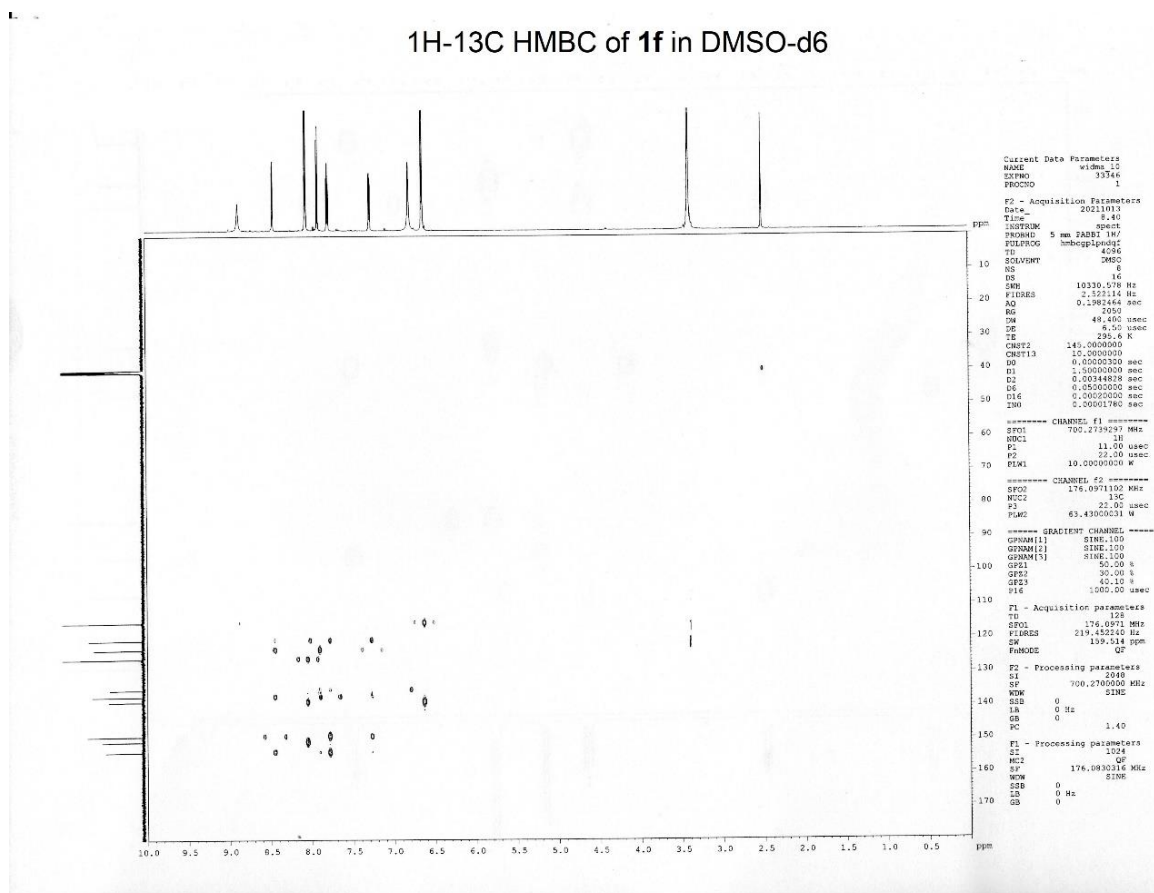

Figure S24.  $^1\text{H}$ - $^{13}\text{C}$  HMBC spectrum of **1f** (in DMSO- $d_6$ ), with enlarged fragment at the top

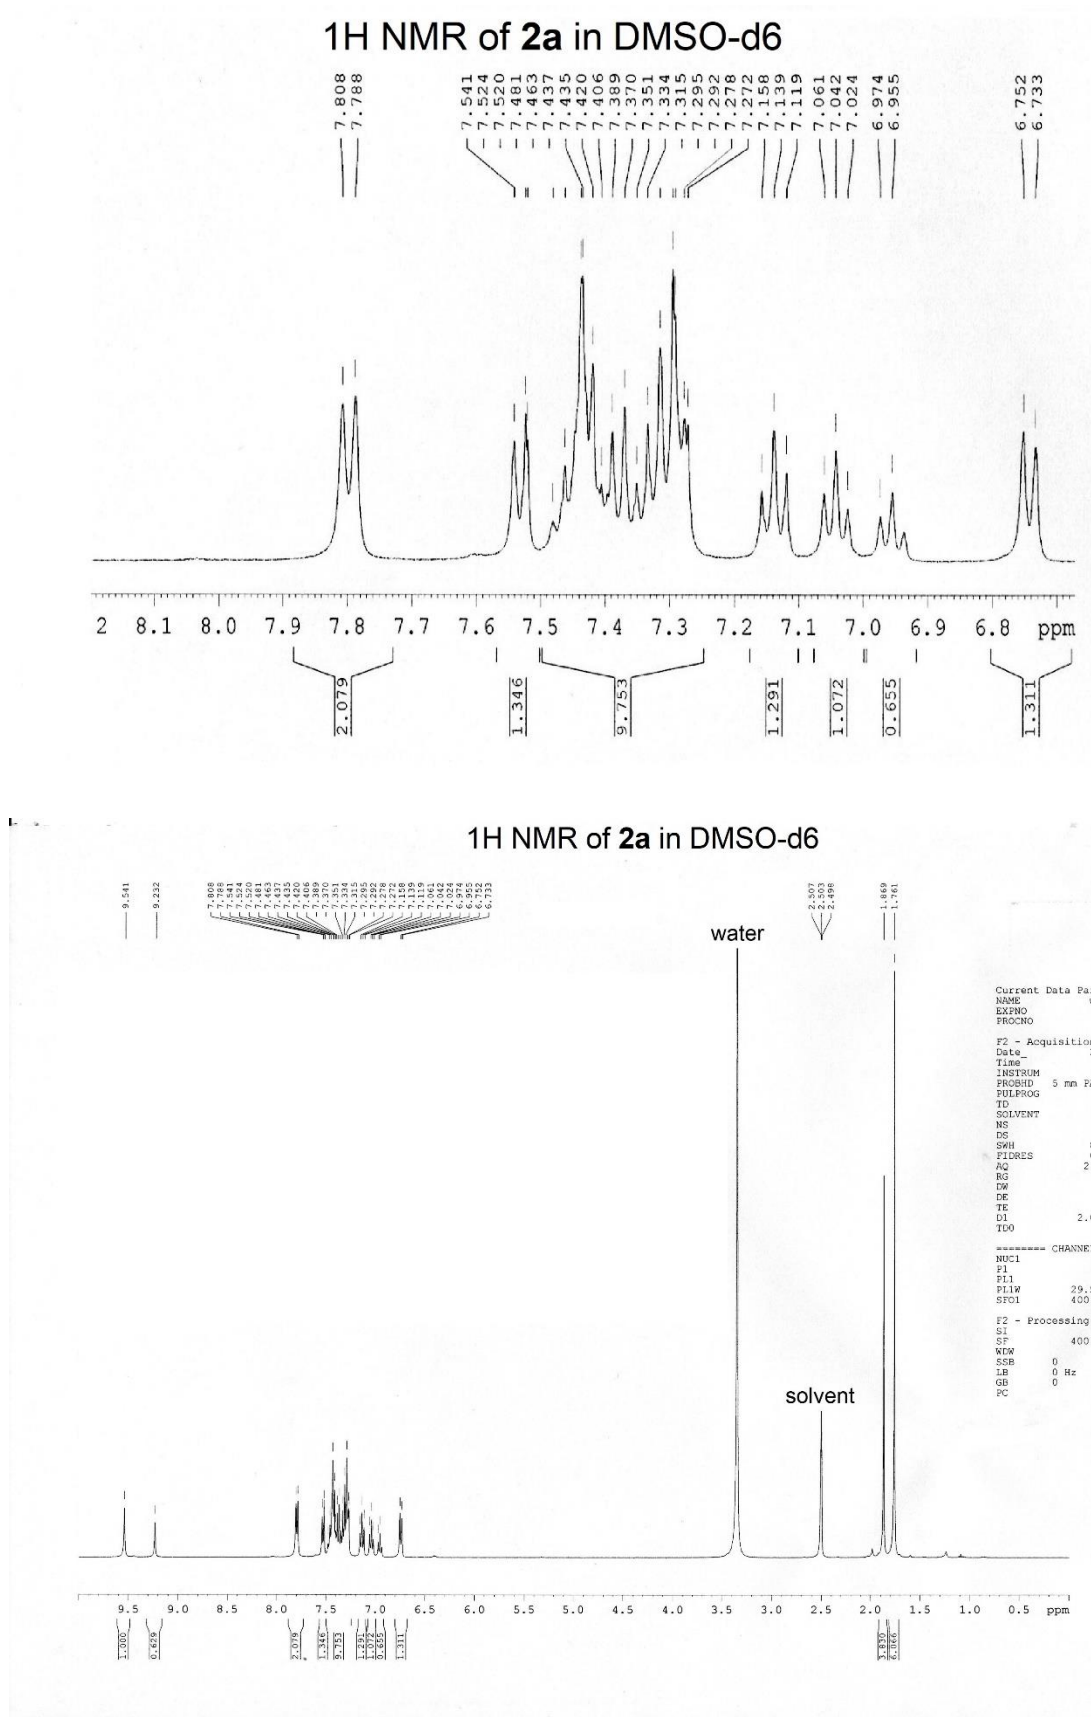

Figure S25. <sup>1</sup>H NMR spectrum of **2a** (in DMSO-d<sub>6</sub>), with enlarged fragment at the top



**<sup>13</sup>C NMR of 2a in DMSO-d<sub>6</sub>**

Chemical structure of 2a is shown above the spectrum.

**Peak List (ppm):**

- 140.568
- 140.405
- 136.190
- 135.802
- 133.796
- 133.518
- 131.157
- 130.315
- 129.578
- 128.931
- 128.867
- 128.656
- 127.530
- 123.958
- 123.580
- 123.563
- 120.982

**Inset Peak List (ppm):**

- 169.379
- 168.938
- 168.474
- 162.772

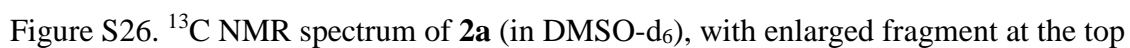

**$^1\text{H}$ - $^{13}\text{C}$  HMQC of **2a** in DMSO- $d_6$**

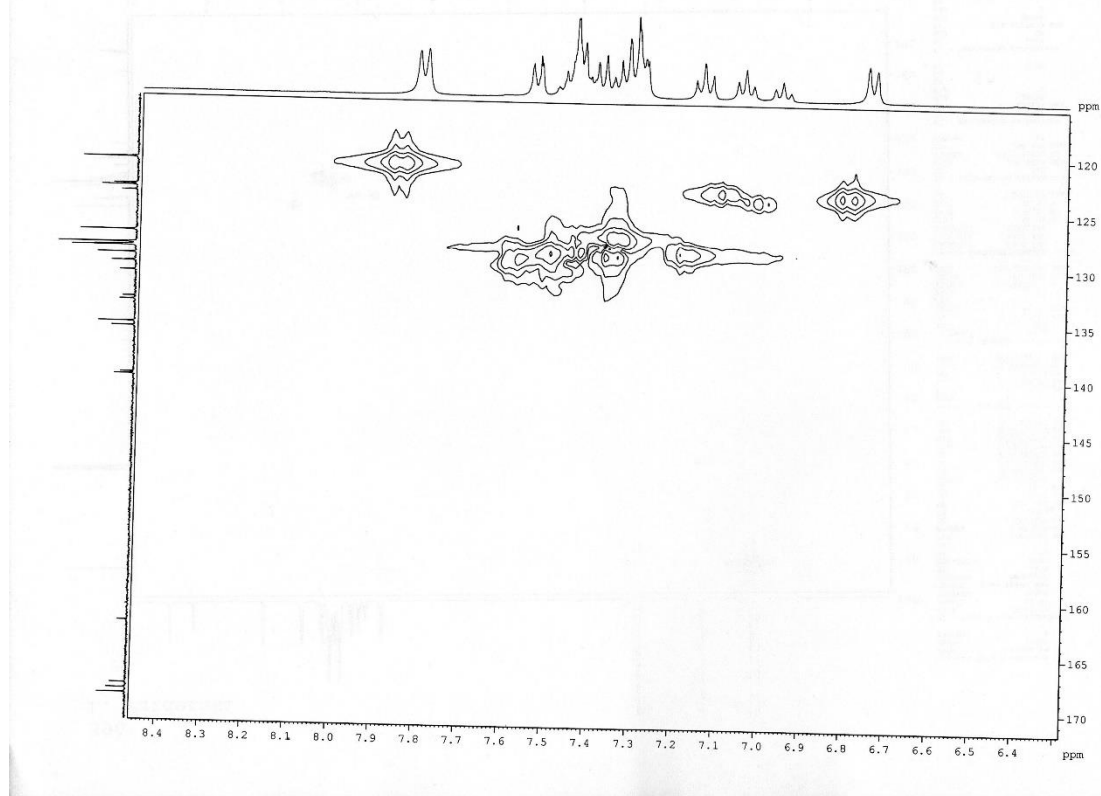

**$^1\text{H}$ - $^{13}\text{C}$  HMQC of **2a** in DMSO- $d_6$**

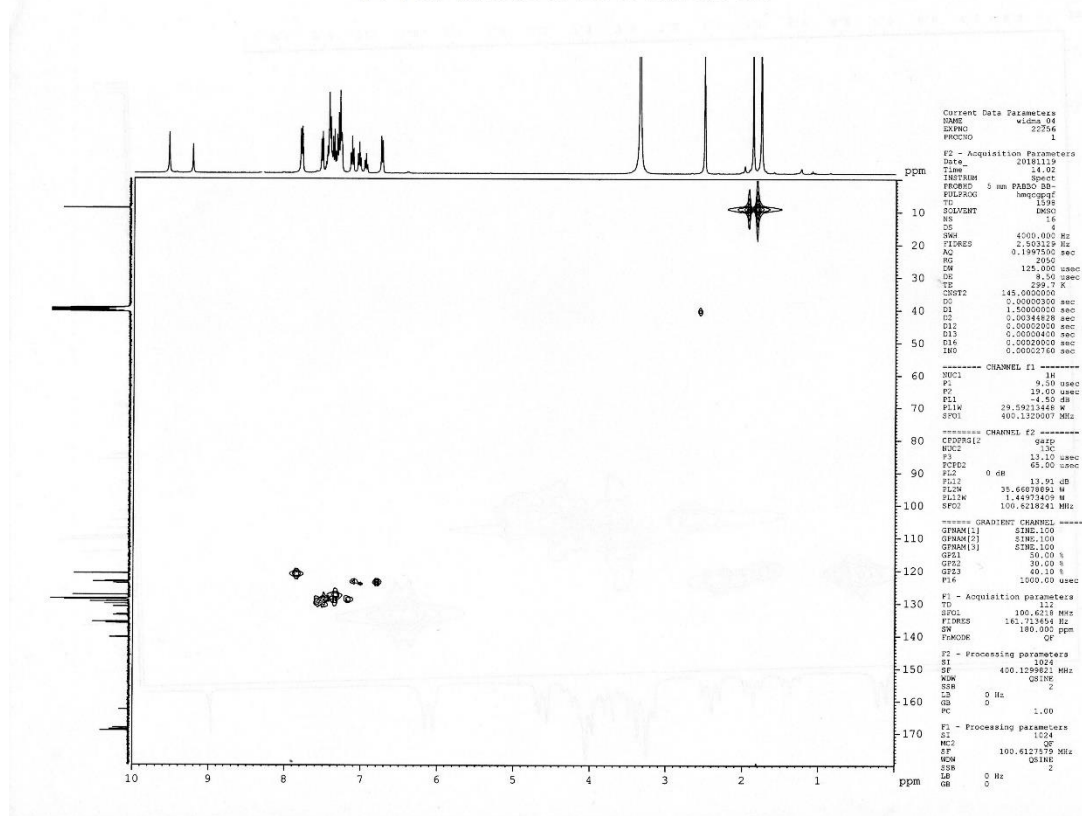

Figure S27.  $^1\text{H}$ - $^{13}\text{C}$  HMQC spectrum of **2a** (in DMSO- $d_6$ ), with enlarged fragment at the top









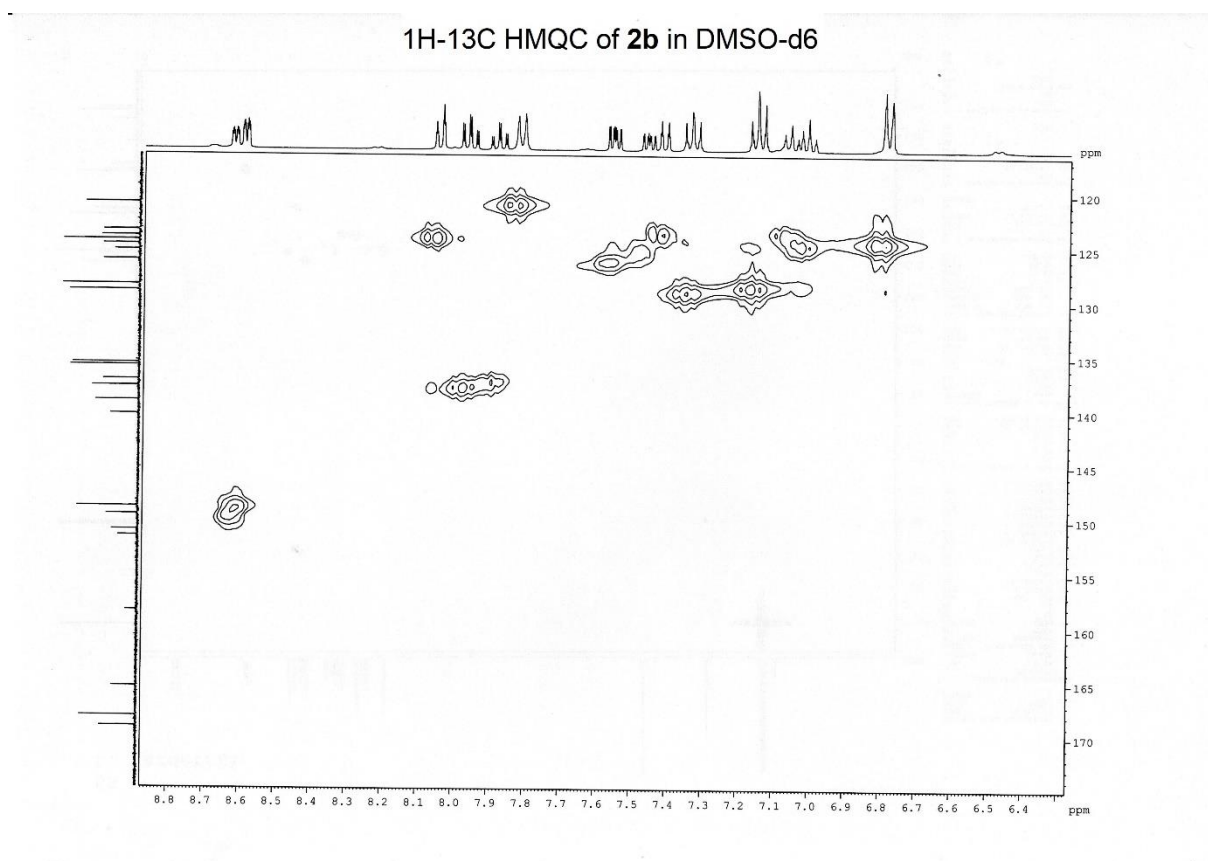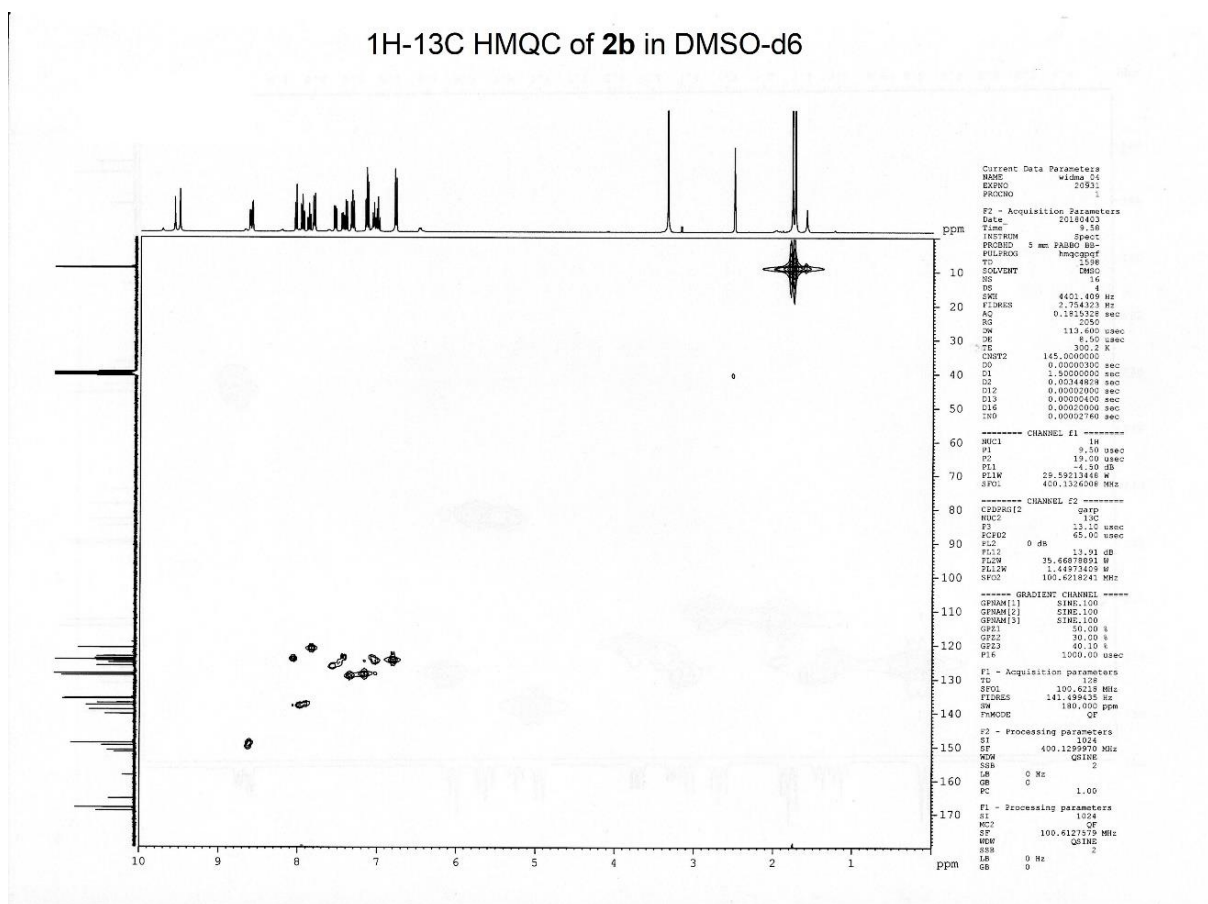

Figure S31.  $^1\text{H}$ - $^{13}\text{C}$  HMQC spectrum of **2b** (in DMSO- $d_6$ ), with enlarged fragment at the top

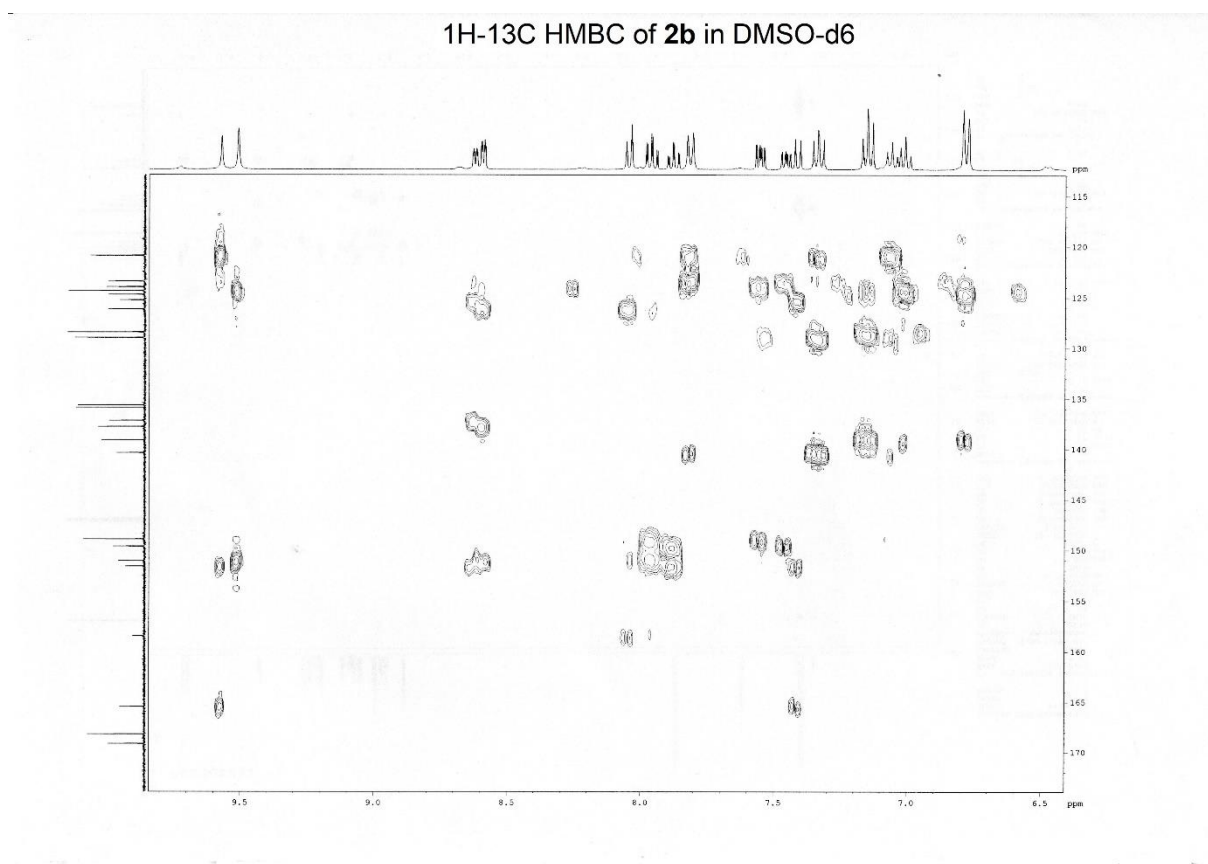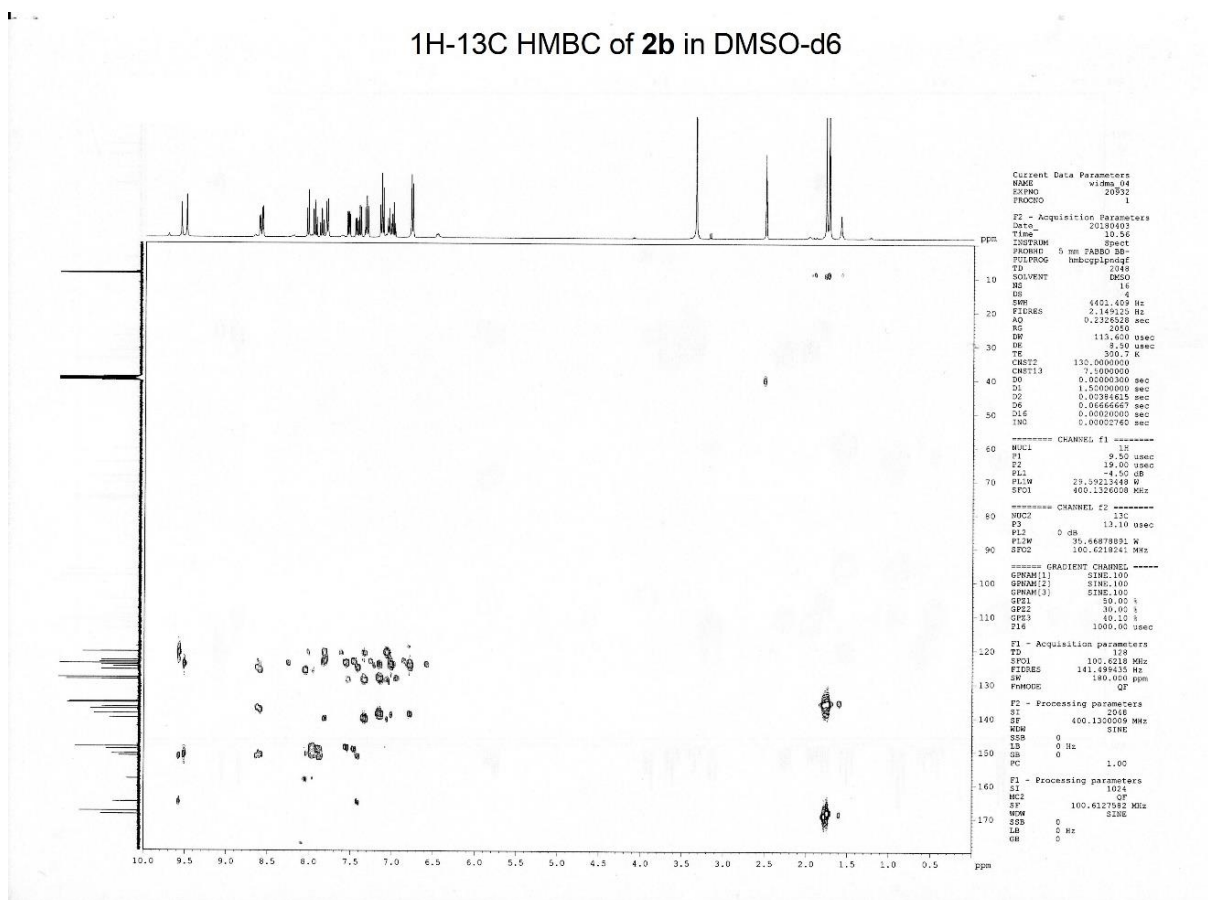

Figure S32.  $^1\text{H}$ - $^{13}\text{C}$  HMBC spectrum of **2b** (in DMSO- $d_6$ ), with enlarged fragment at the top

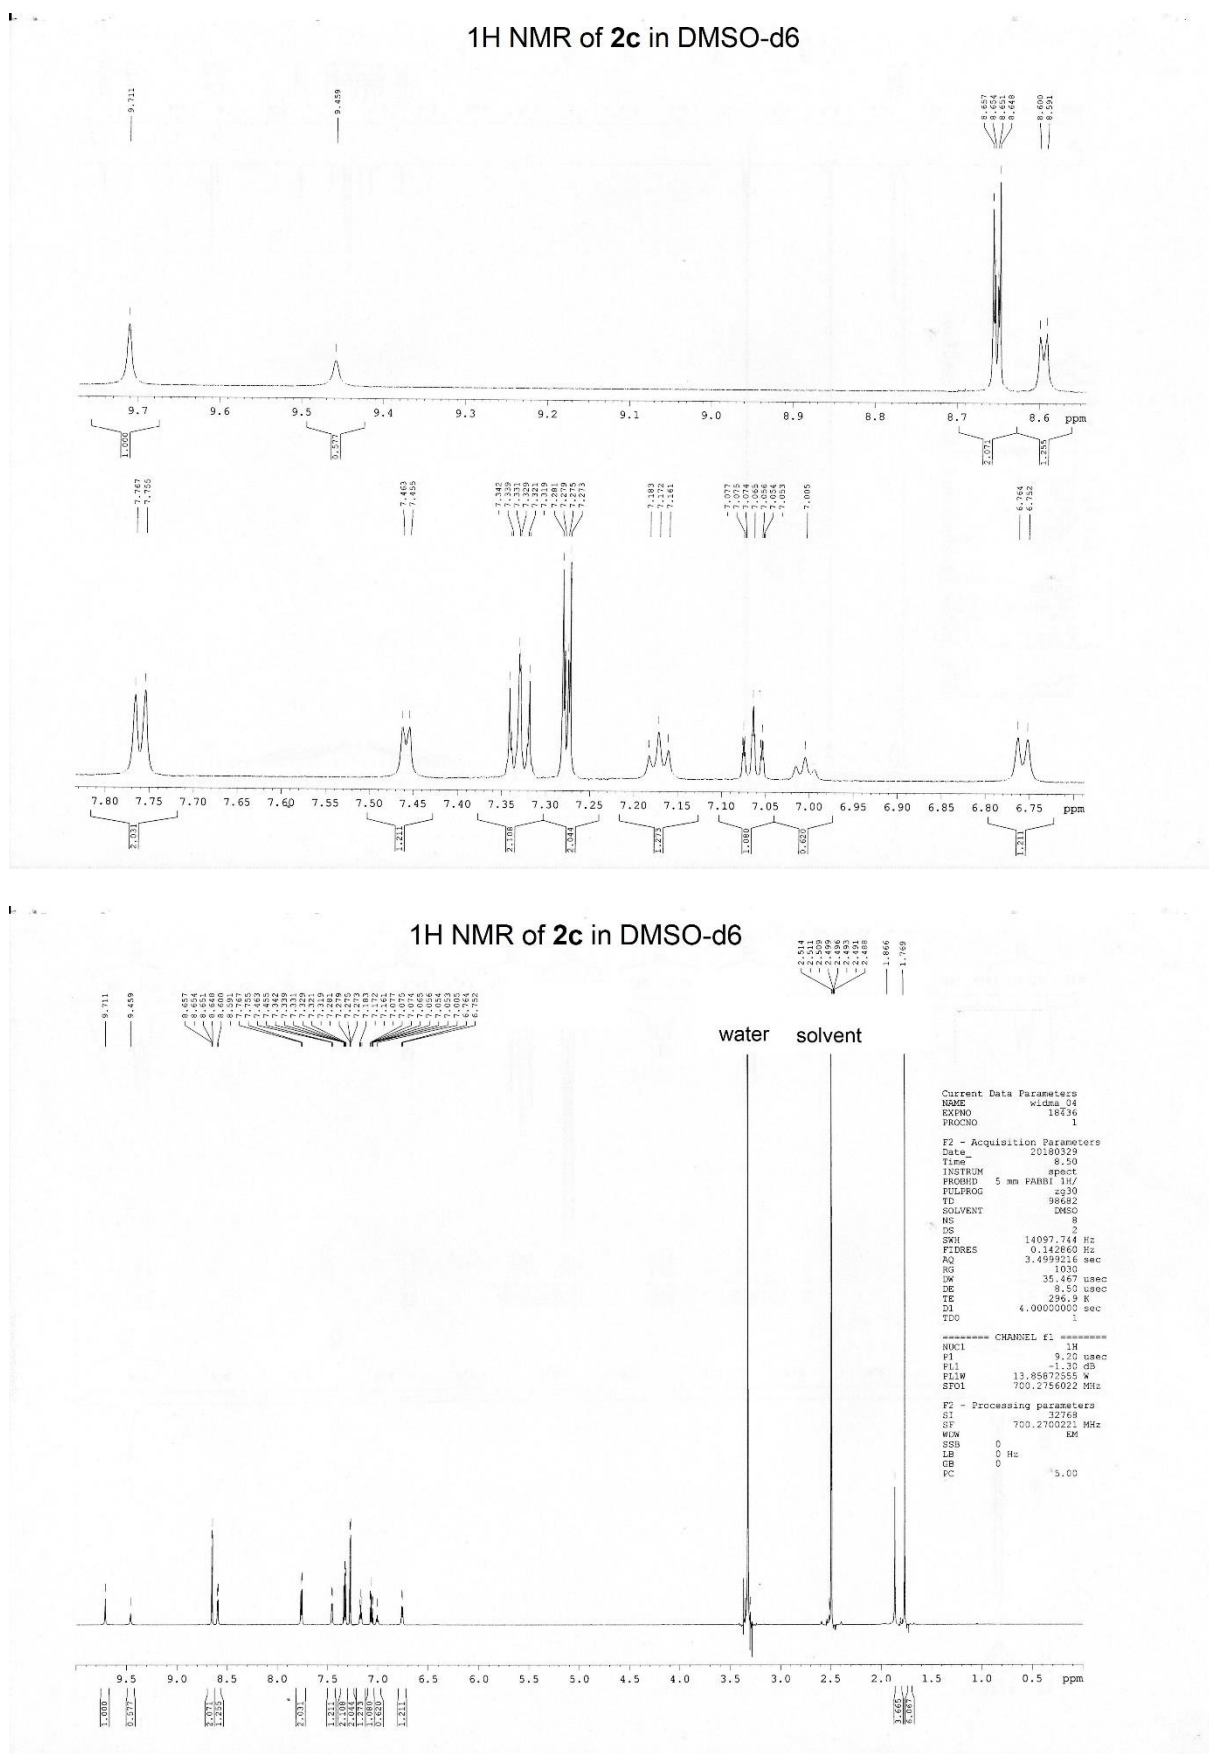

Figure S33. <sup>1</sup>H NMR spectrum of 2c (in DMSO-d<sub>6</sub>), with enlarged fragment at the top



# **<sup>13</sup>C NMR of 2c in DMSO-d<sub>6</sub>**

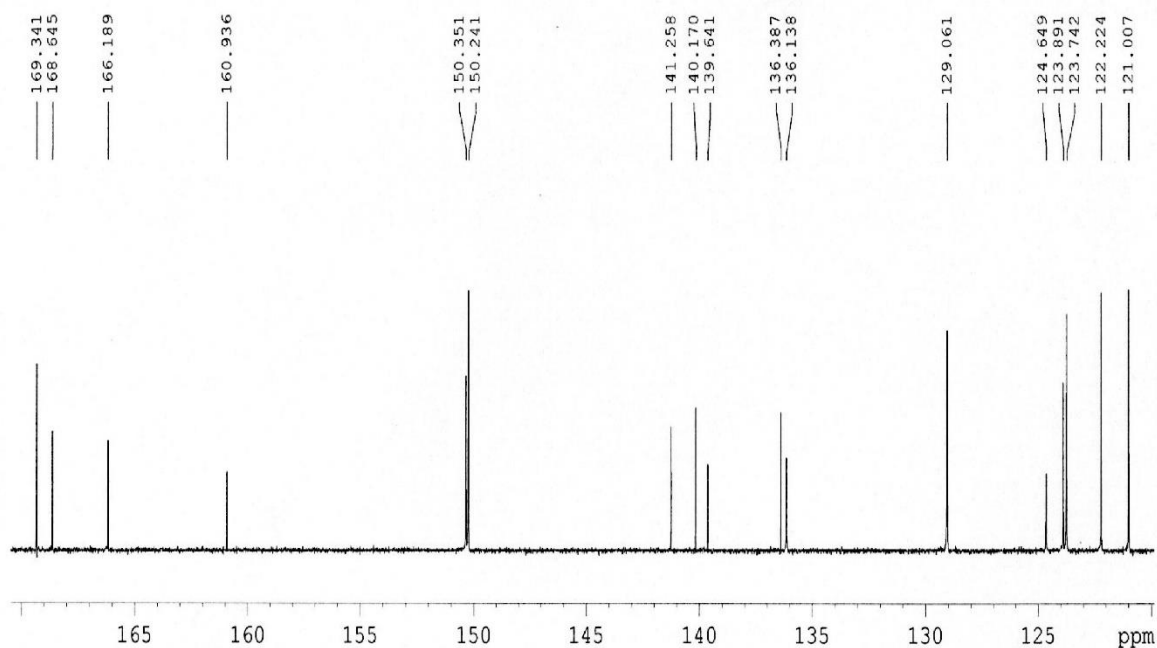

## **<sup>13</sup>C NMR of 2c in DMSO-d<sub>6</sub>**

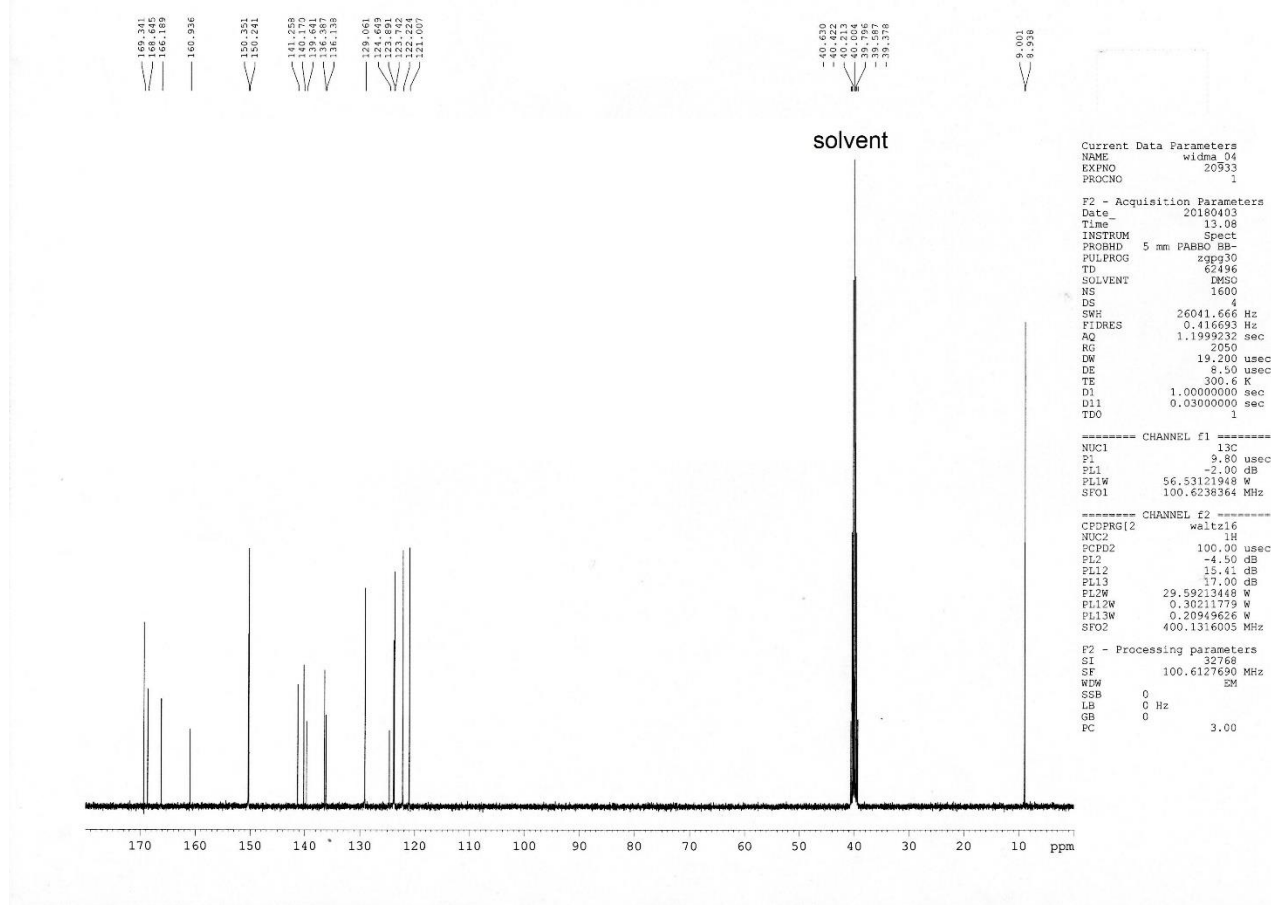

Figure S34. <sup>13</sup>C NMR spectrum of 2c (in DMSO-d<sub>6</sub>), with enlarged fragment at the top

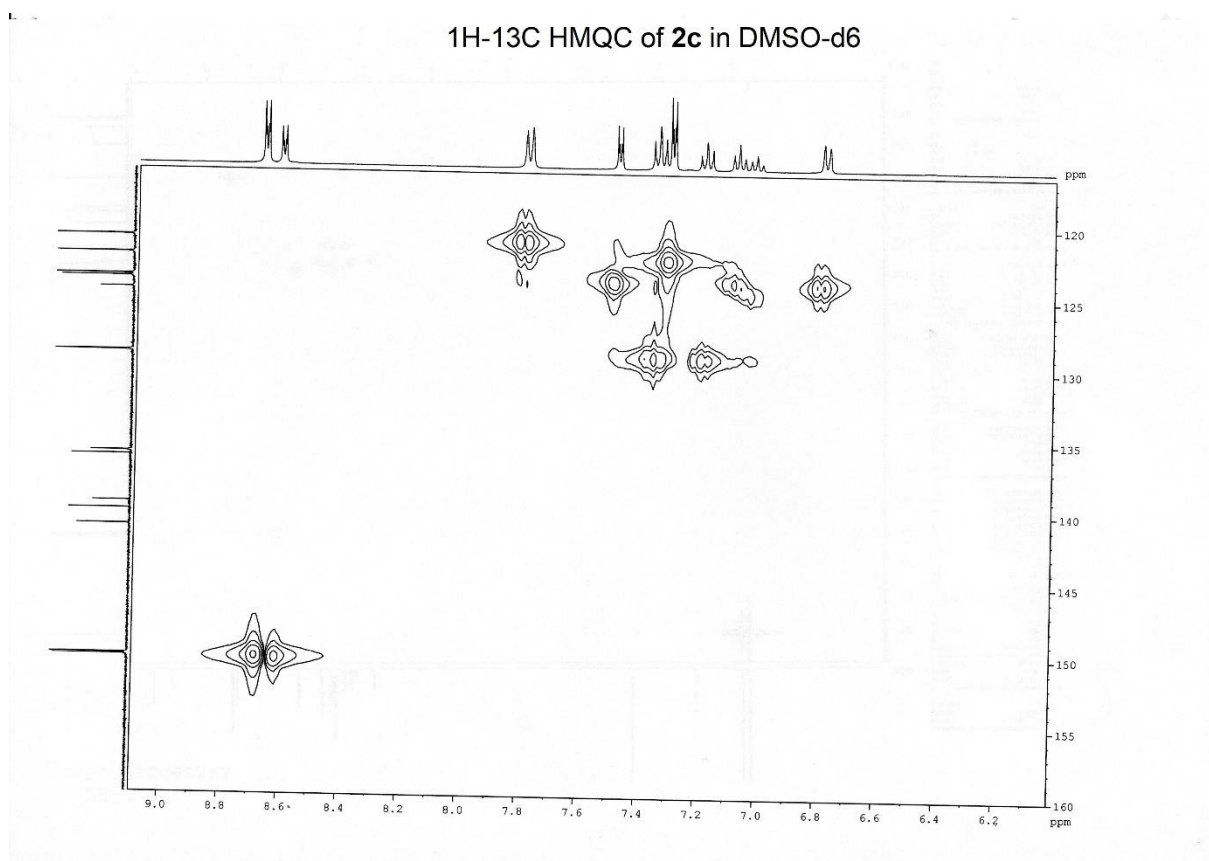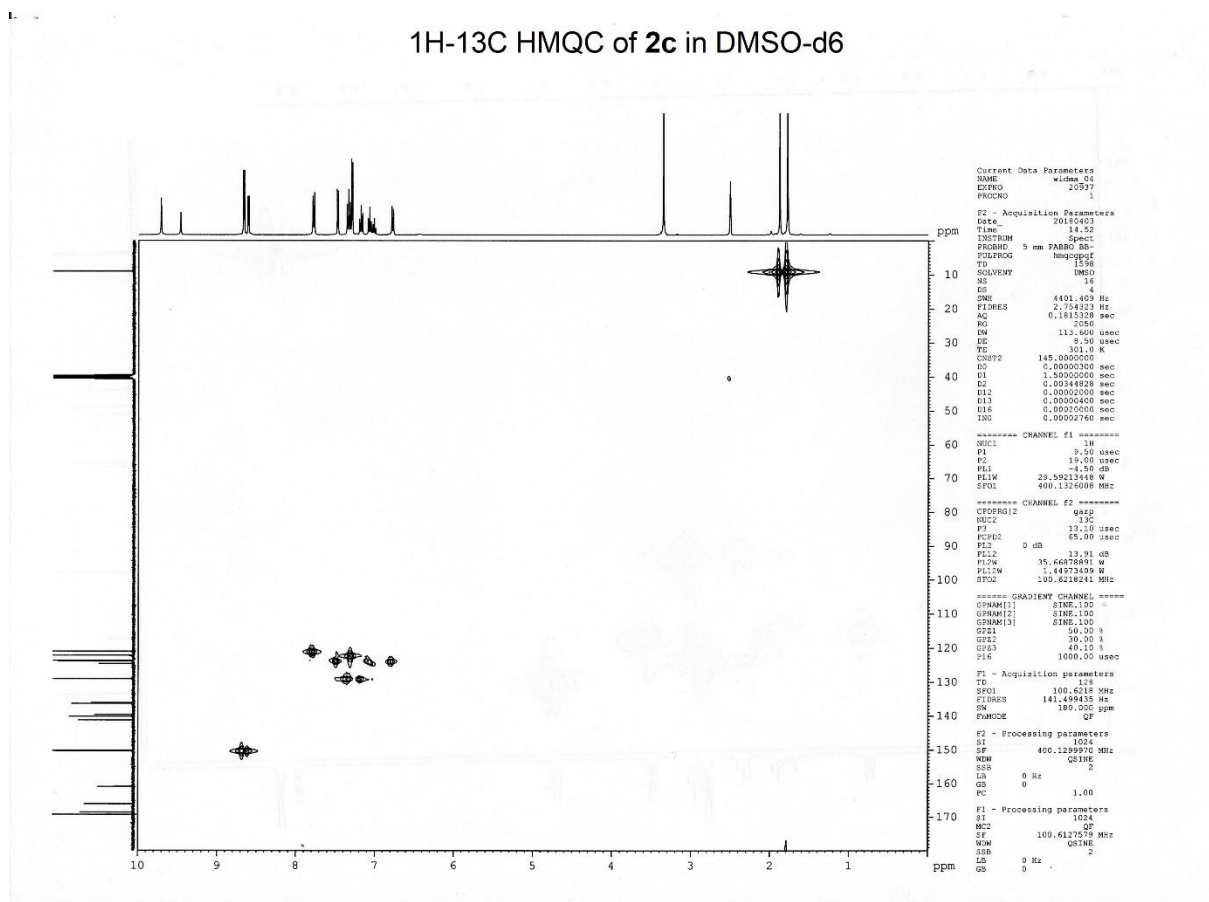

Figure S35.  $^1\text{H}$ - $^{13}\text{C}$  HMQC spectrum of **2c** (in DMSO- $d_6$ ), with enlarged fragment at the top

# <sup>1</sup>H-<sup>13</sup>C HMBC of **2c** in DMSO-d<sub>6</sub>

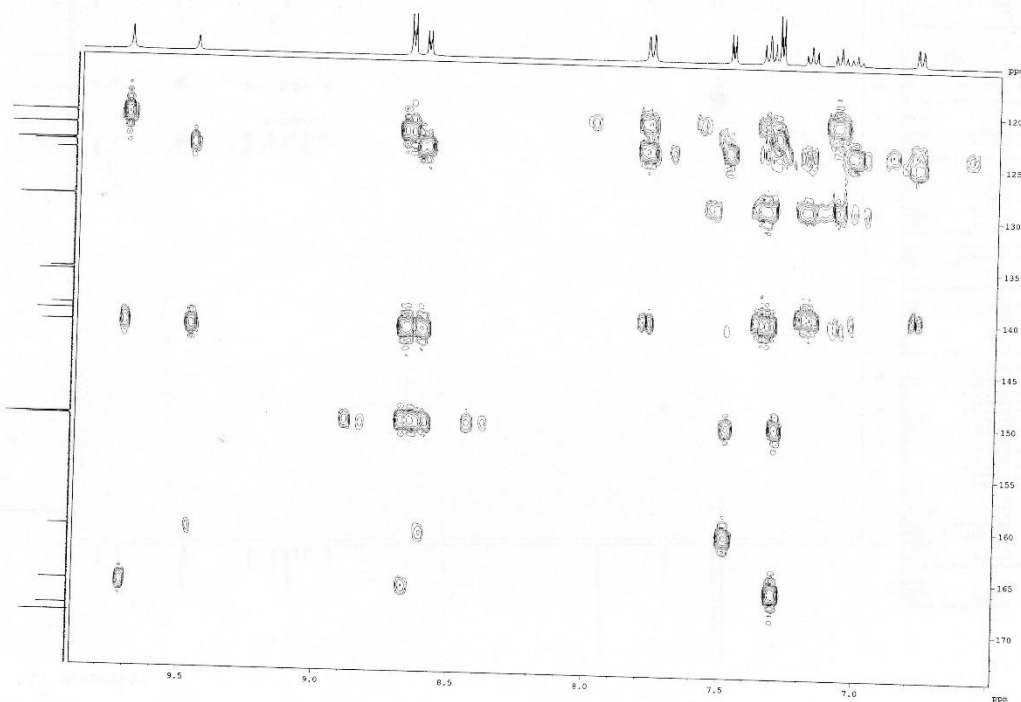

# <sup>1</sup>H-<sup>13</sup>C HMBC of **2c** in DMSO-d<sub>6</sub>

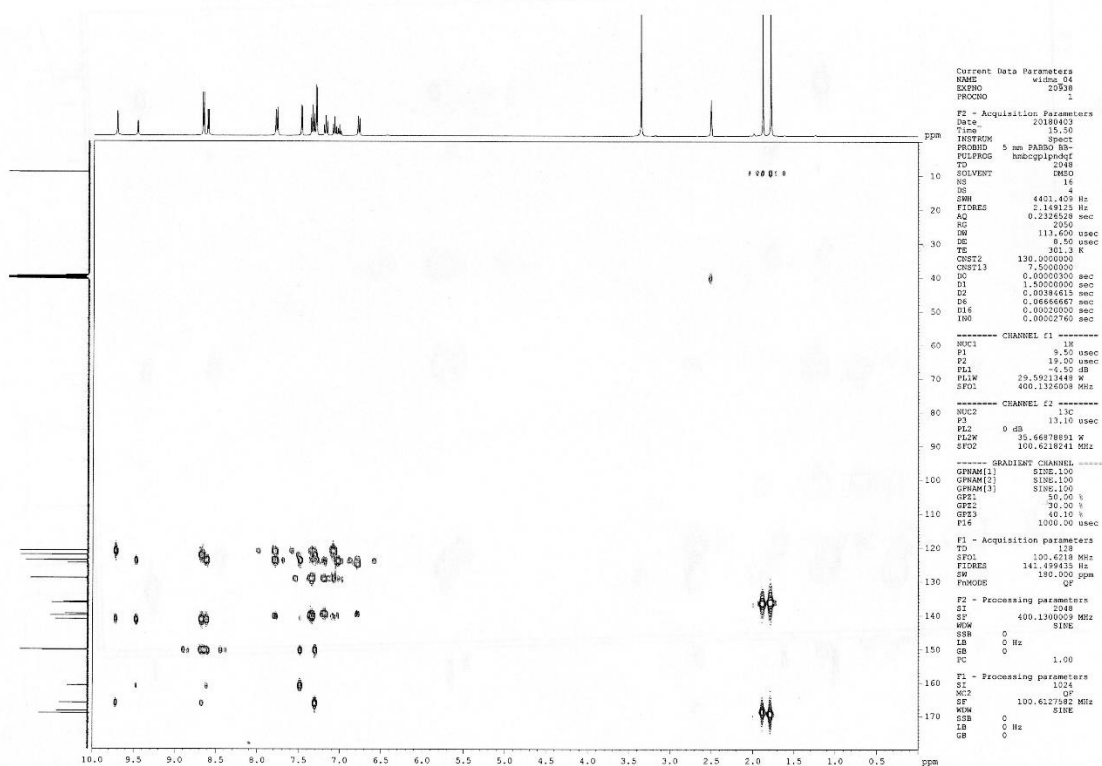

Figure S36. <sup>1</sup>H-<sup>13</sup>C HMBC spectrum of **2c** (in DMSO-d<sub>6</sub>), with enlarged fragment at the top

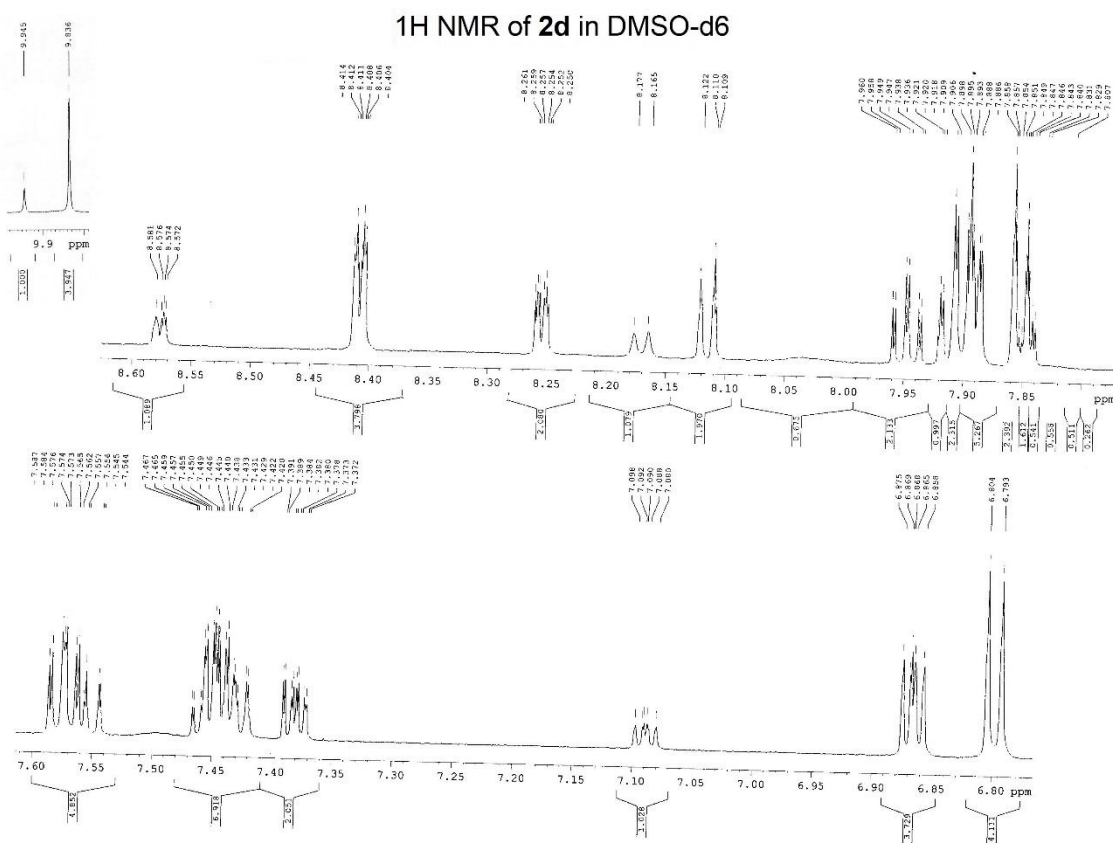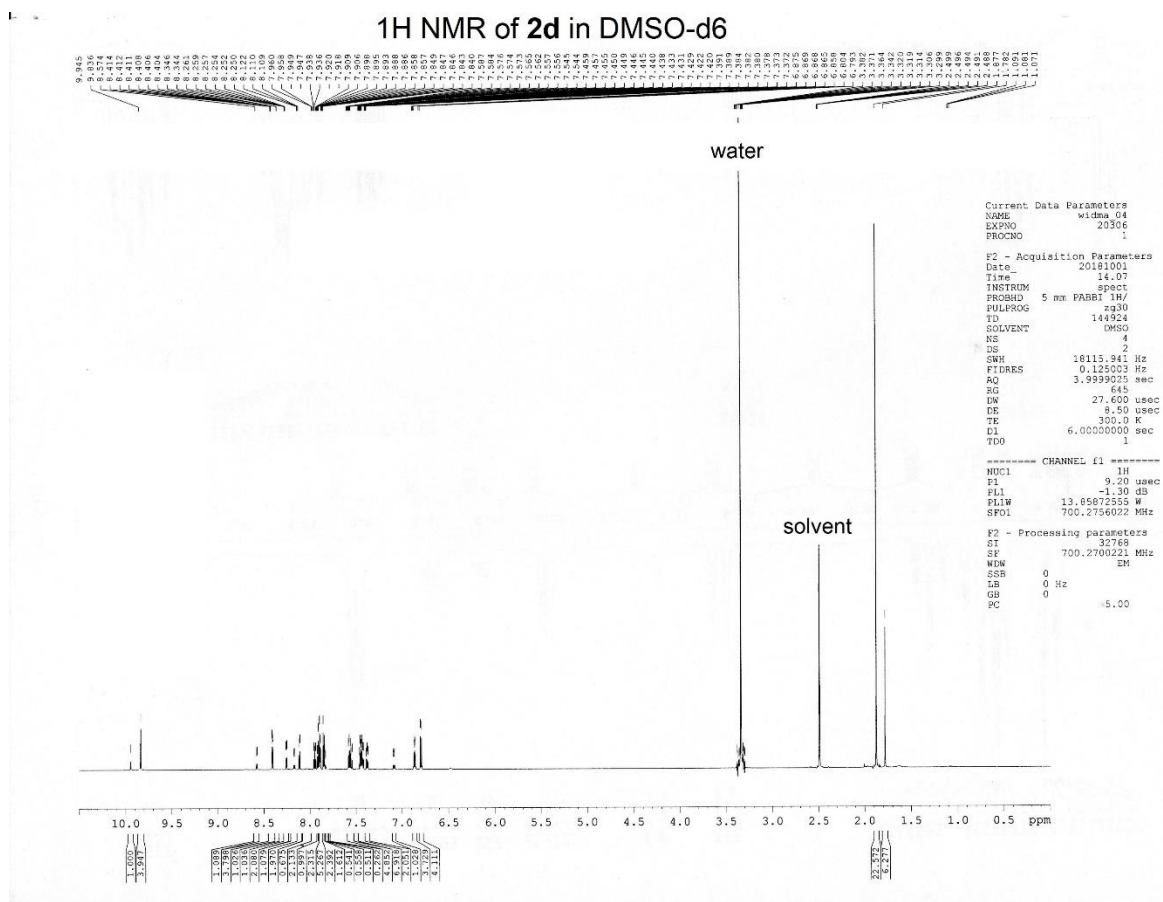

Figure S37. <sup>1</sup>H NMR spectrum of **2d** (in DMSO-d<sub>6</sub>), with enlarged fragment at the top

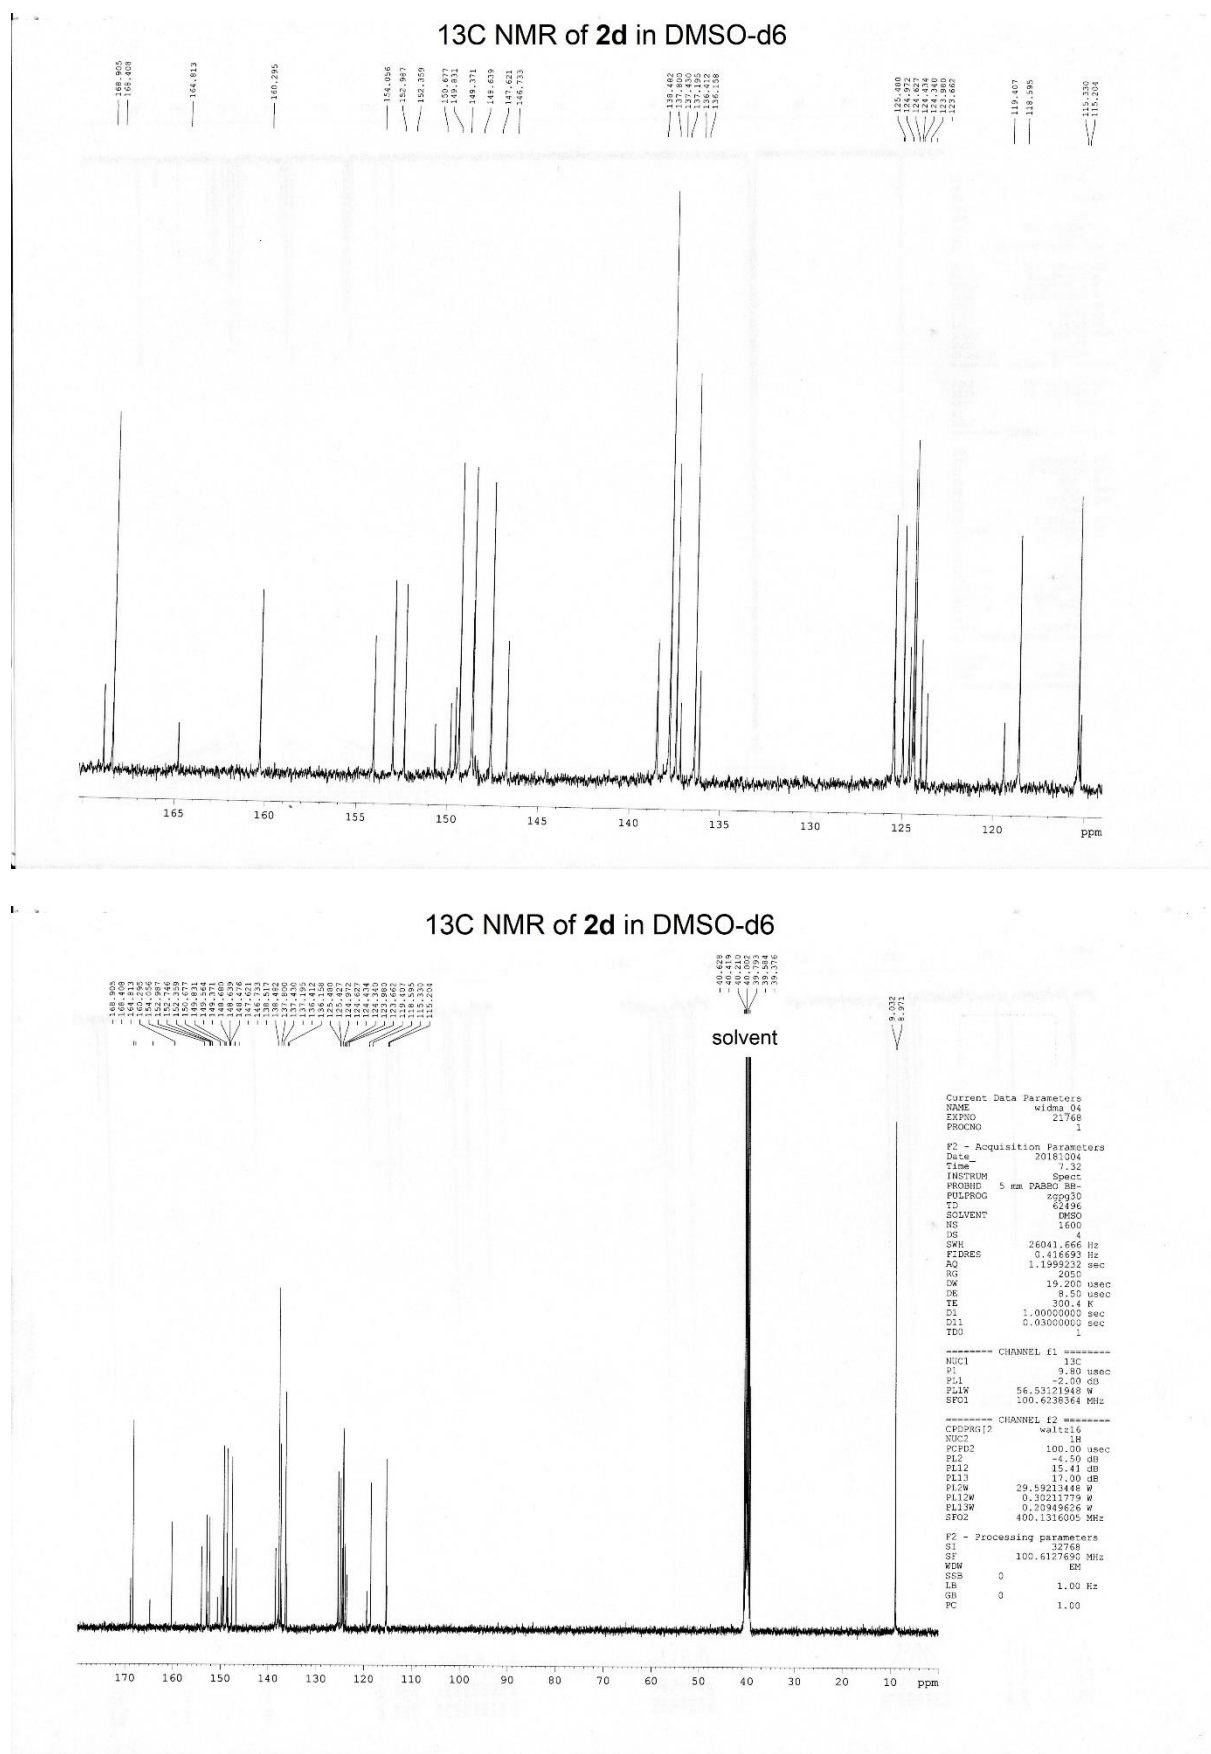

Figure S38.  $^{13}\text{C}$  NMR spectrum of **2d** (in DMSO- $d_6$ ), with enlarged fragment at the top



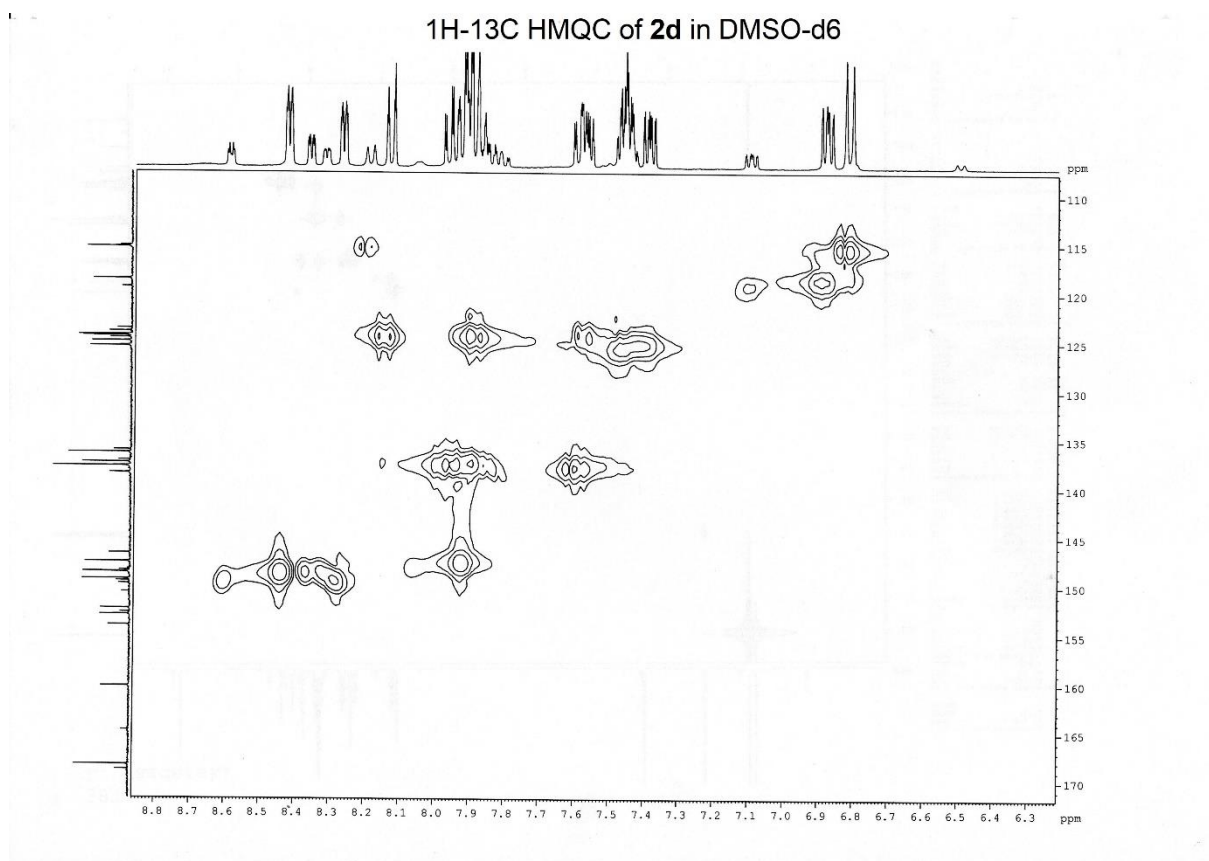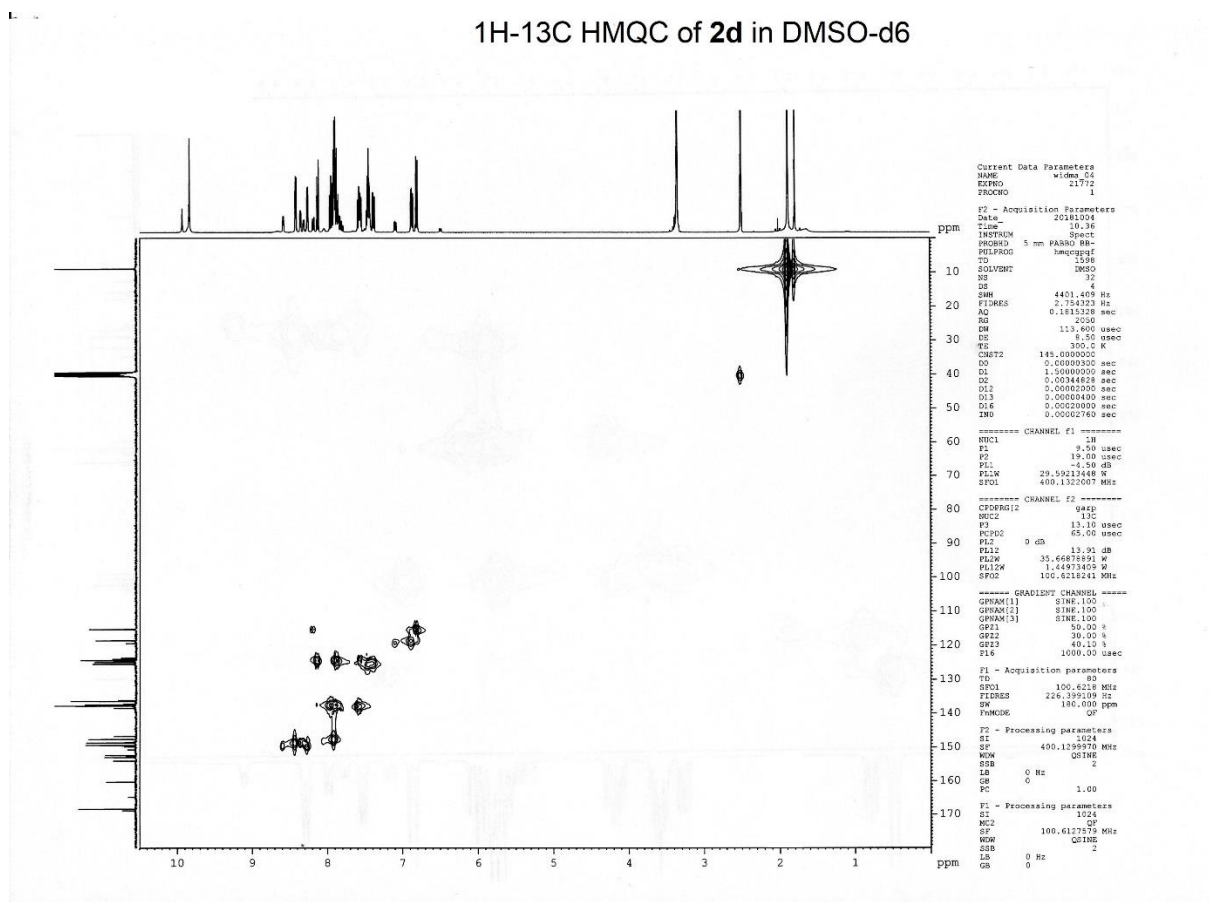

Figure S39.  $^1\text{H}$ - $^{13}\text{C}$  HMQC spectrum of **2d** (in DMSO- $d_6$ ), with enlarged fragment at the top

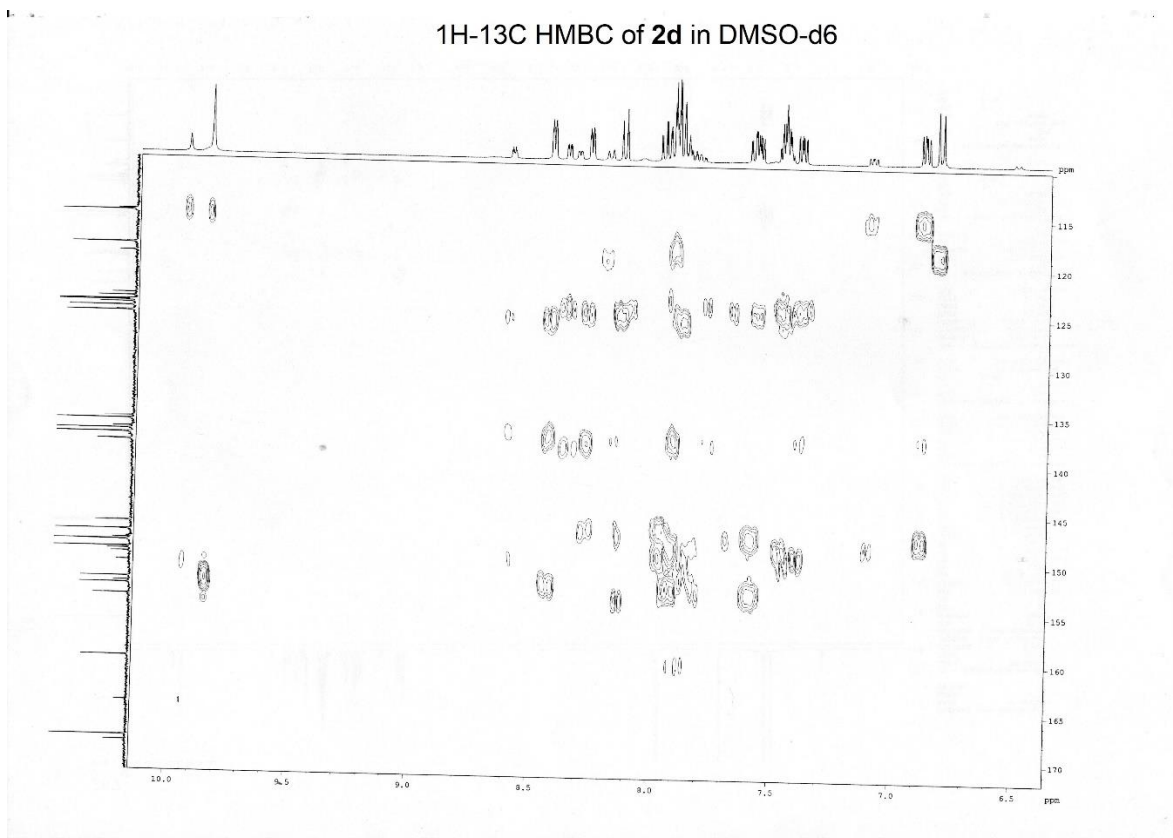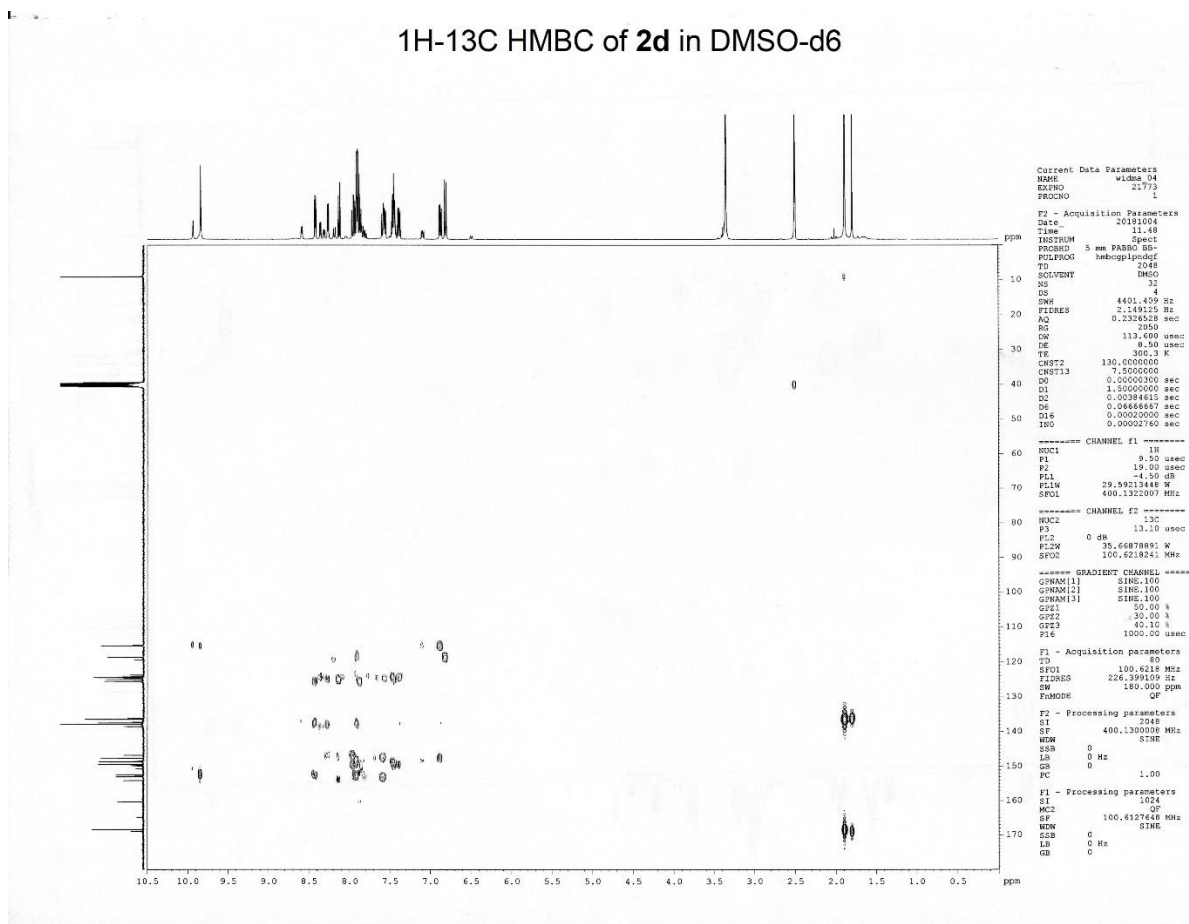

Figure S40.  $^1\text{H}$ - $^{13}\text{C}$  HMBC spectrum of **2d** (in DMSO- $d_6$ ), with enlarged fragment at the top

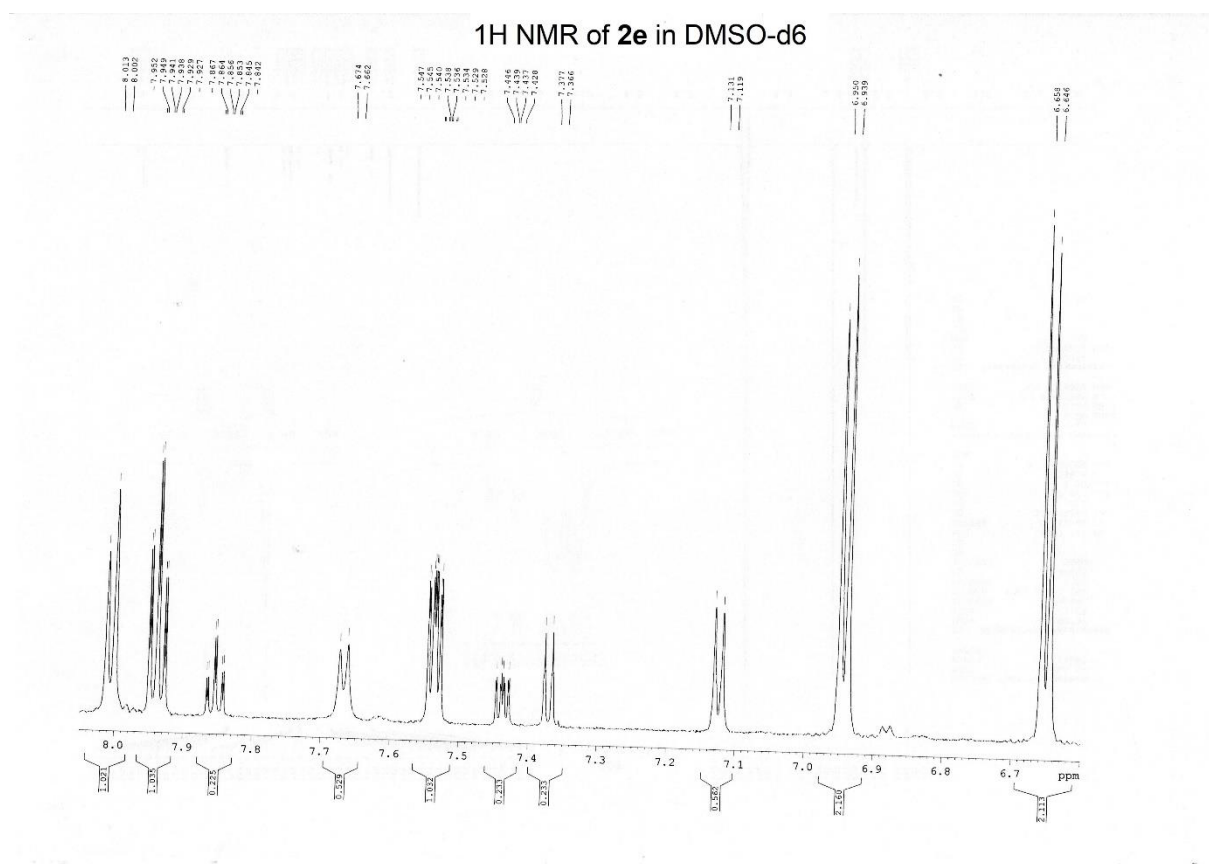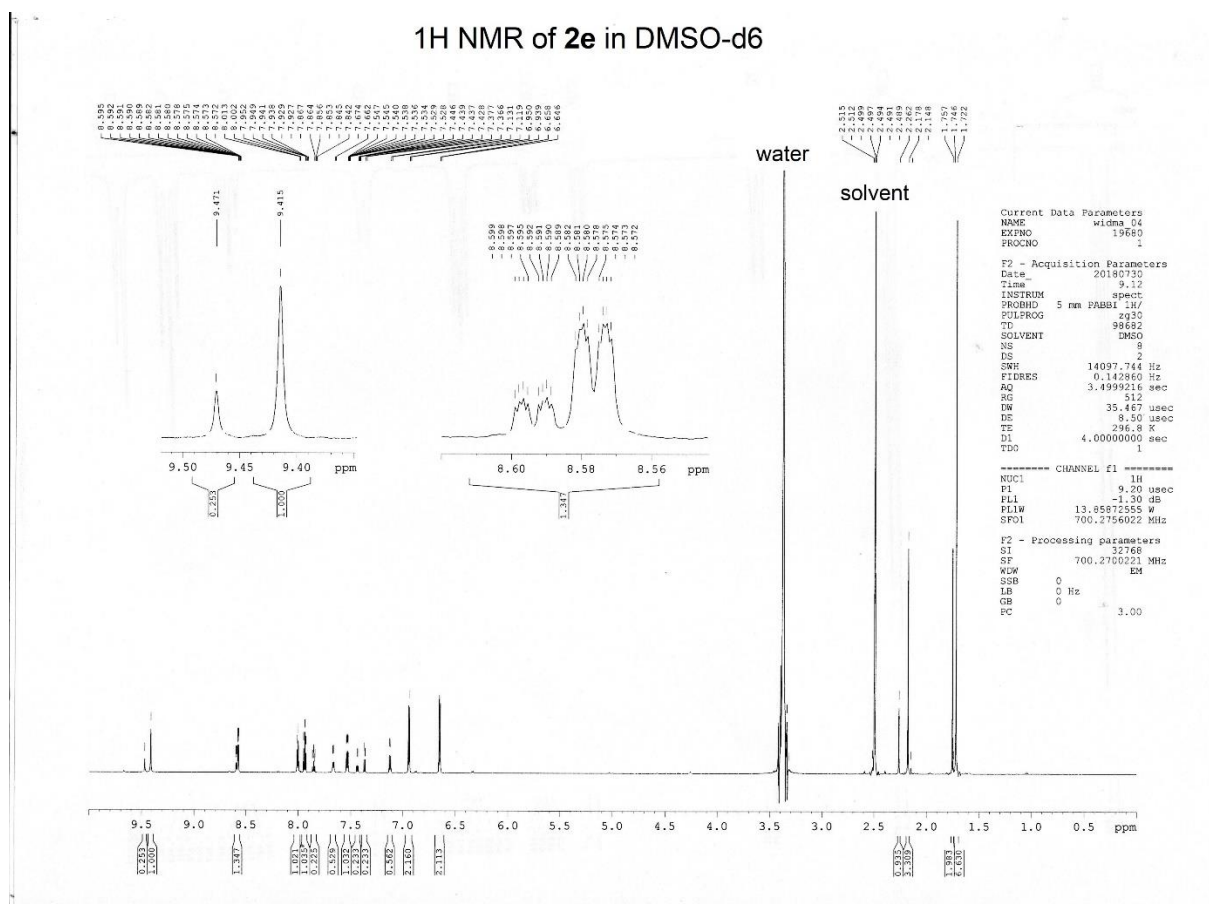

Figure S41. <sup>1</sup>H NMR spectrum of **2e** (in DMSO-d<sub>6</sub>), with enlarged fragment at the top

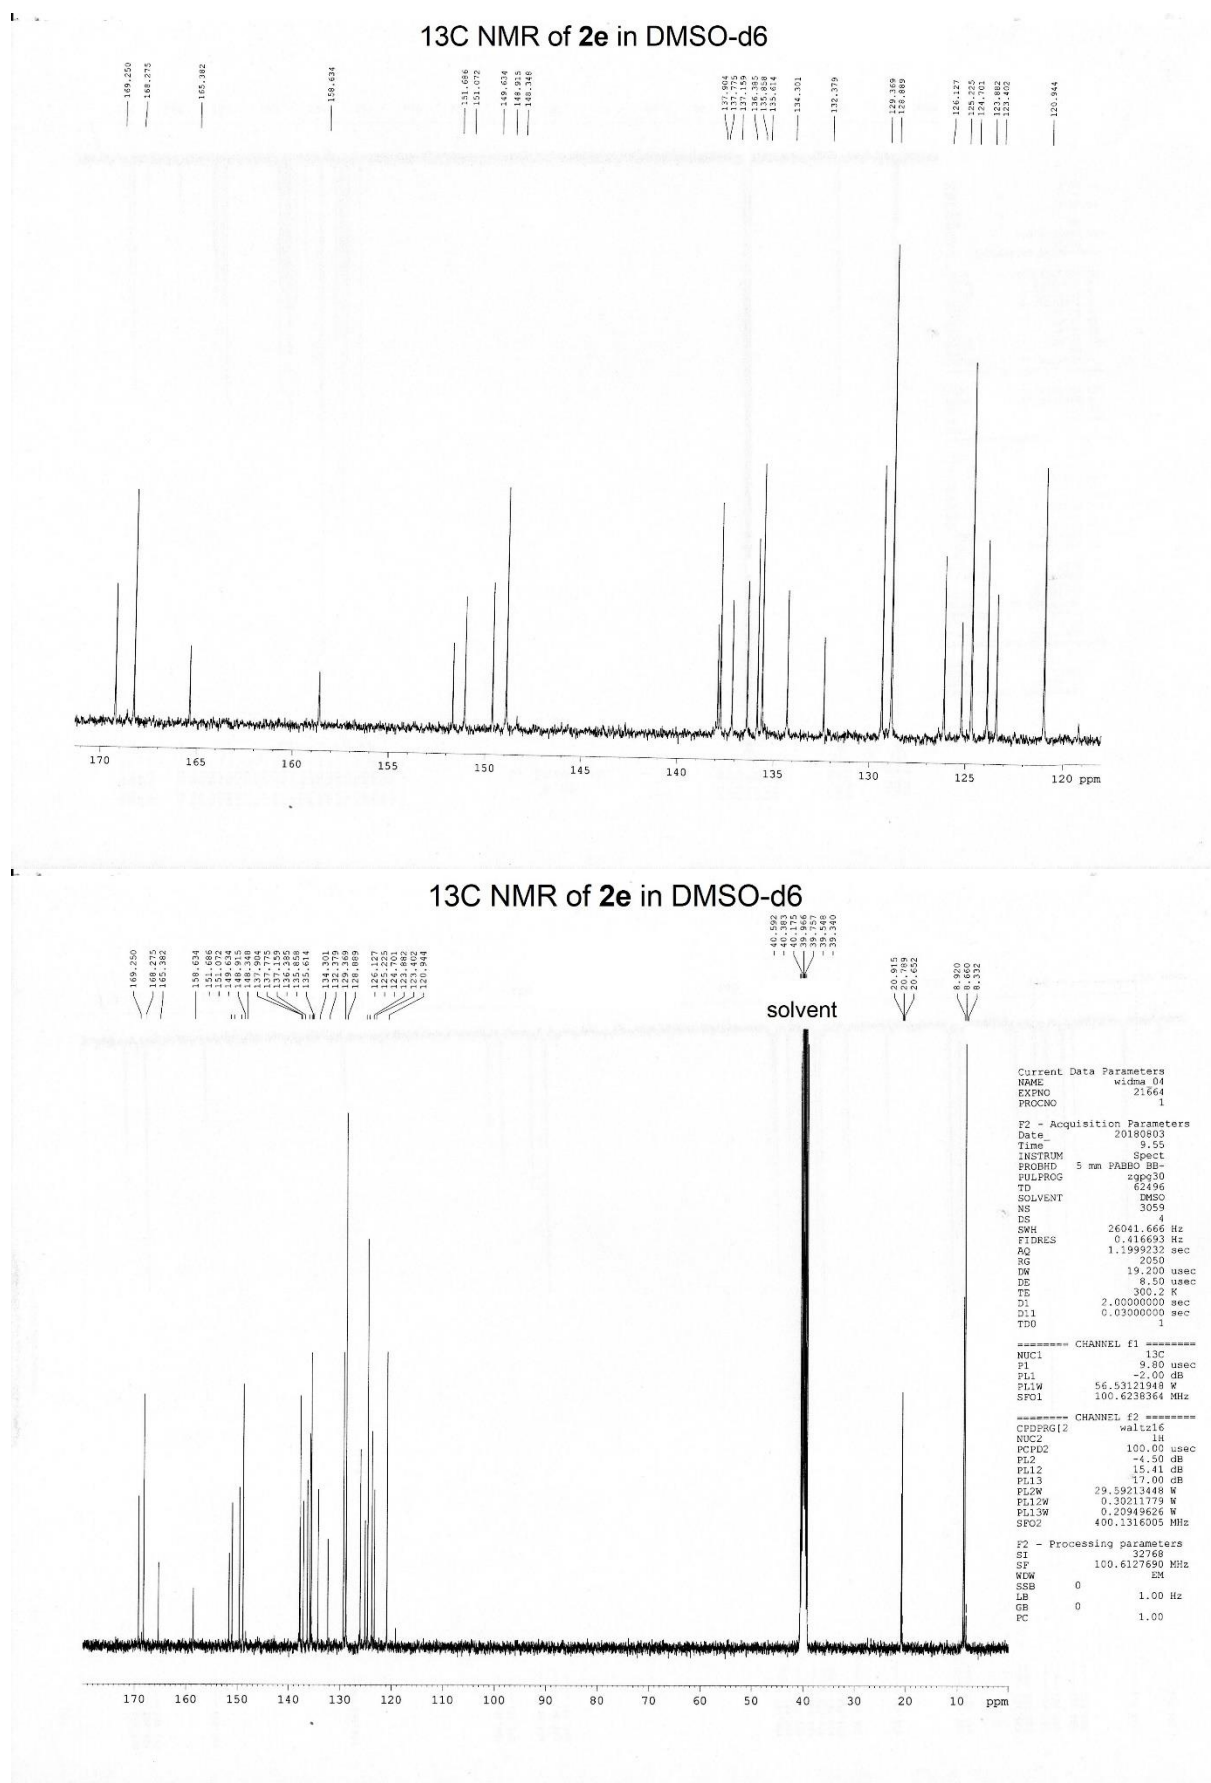

Figure S42. <sup>13</sup>C NMR spectrum of **2e** (in DMSO-d<sub>6</sub>), with enlarged fragment at the top

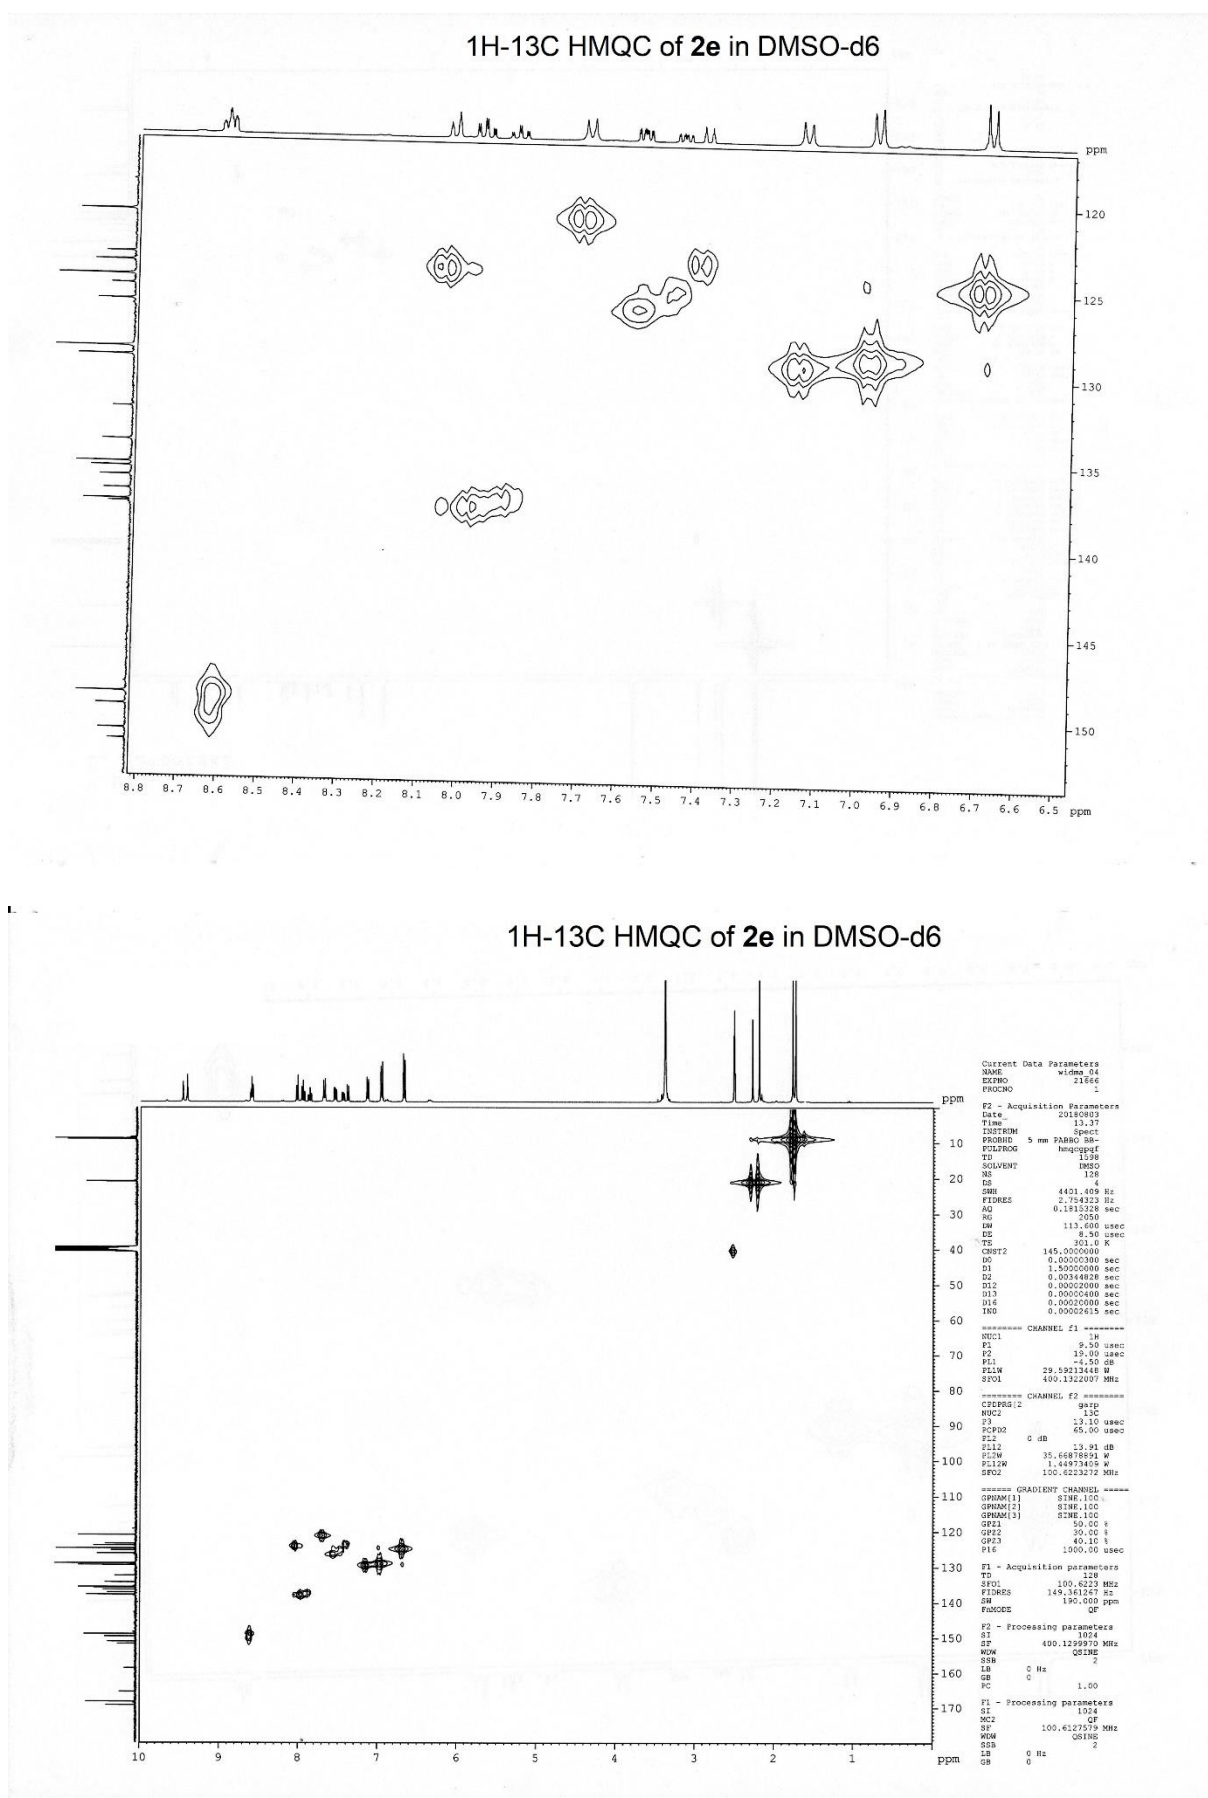

Figure S43.  $^1\text{H}$ - $^{13}\text{C}$  HMQC spectrum of **2e** (in DMSO- $d_6$ ), with enlarged fragment at the top



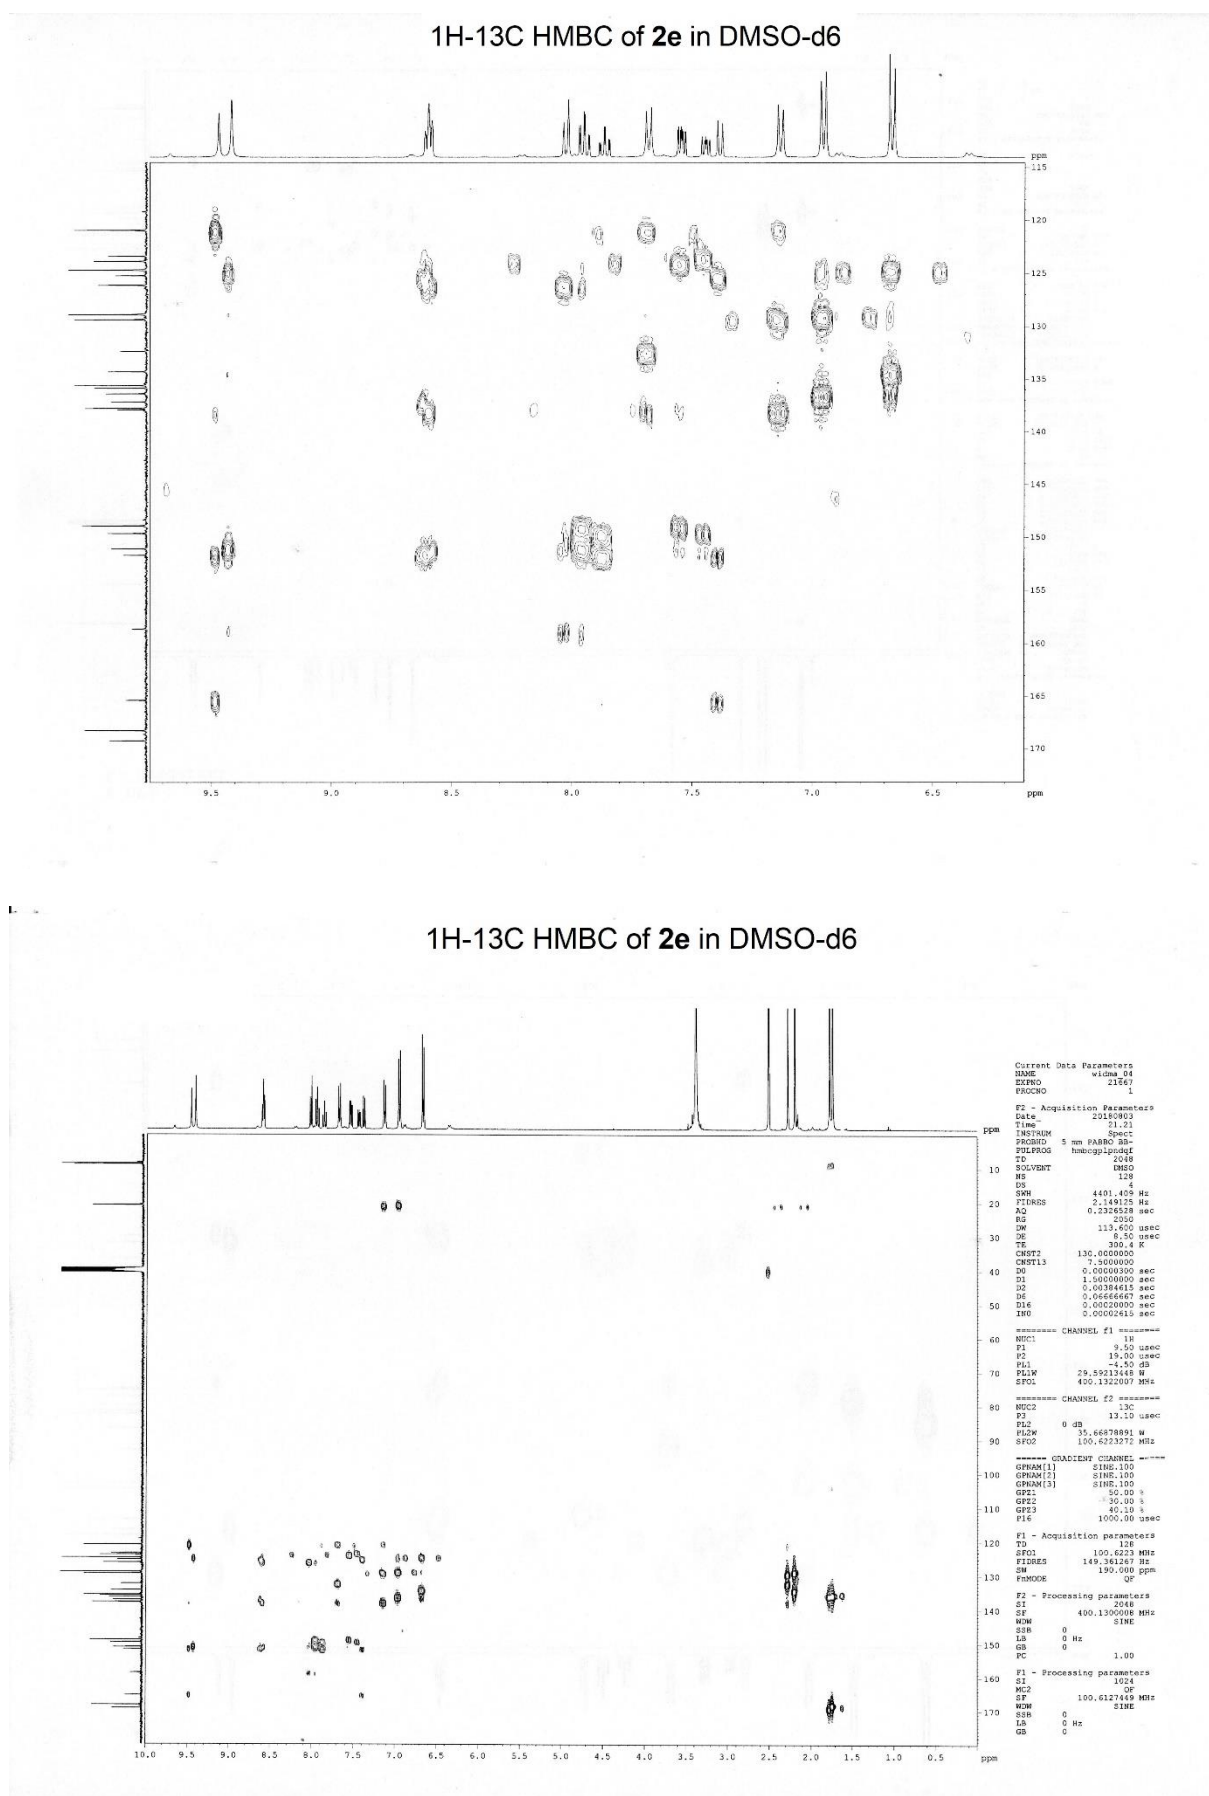

Figure S44.  $^1\text{H}$ - $^{13}\text{C}$  HMBC spectrum of **2e** (in DMSO- $d_6$ ), with enlarged fragment at the top

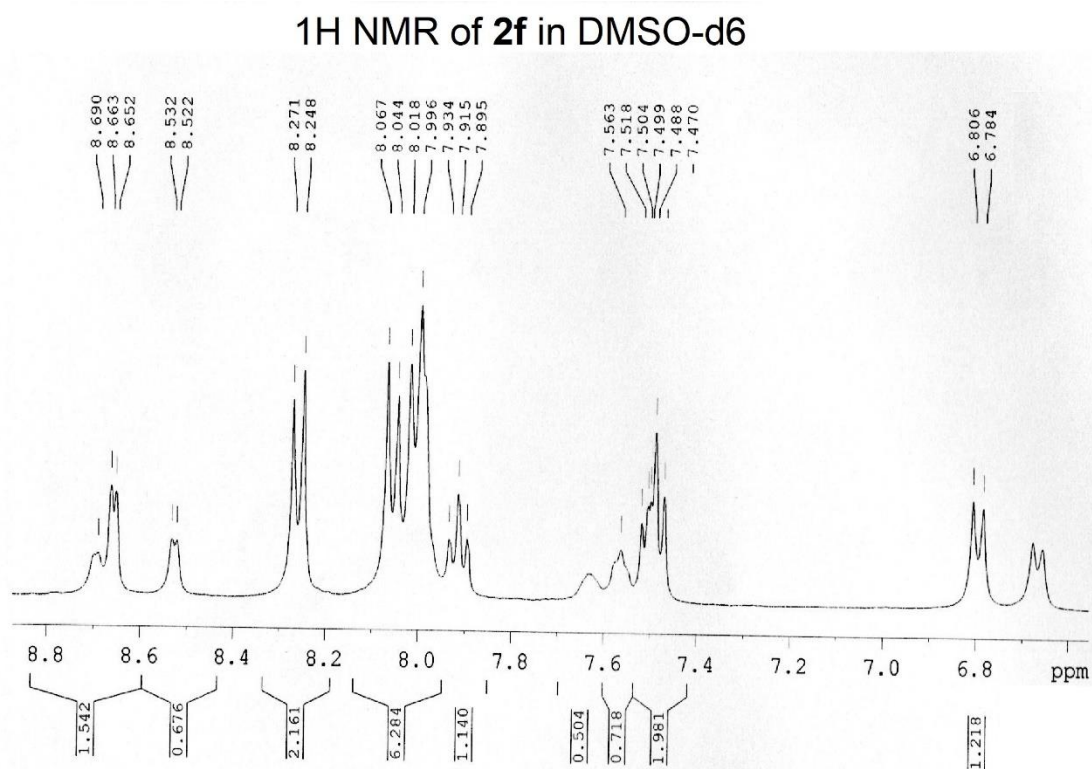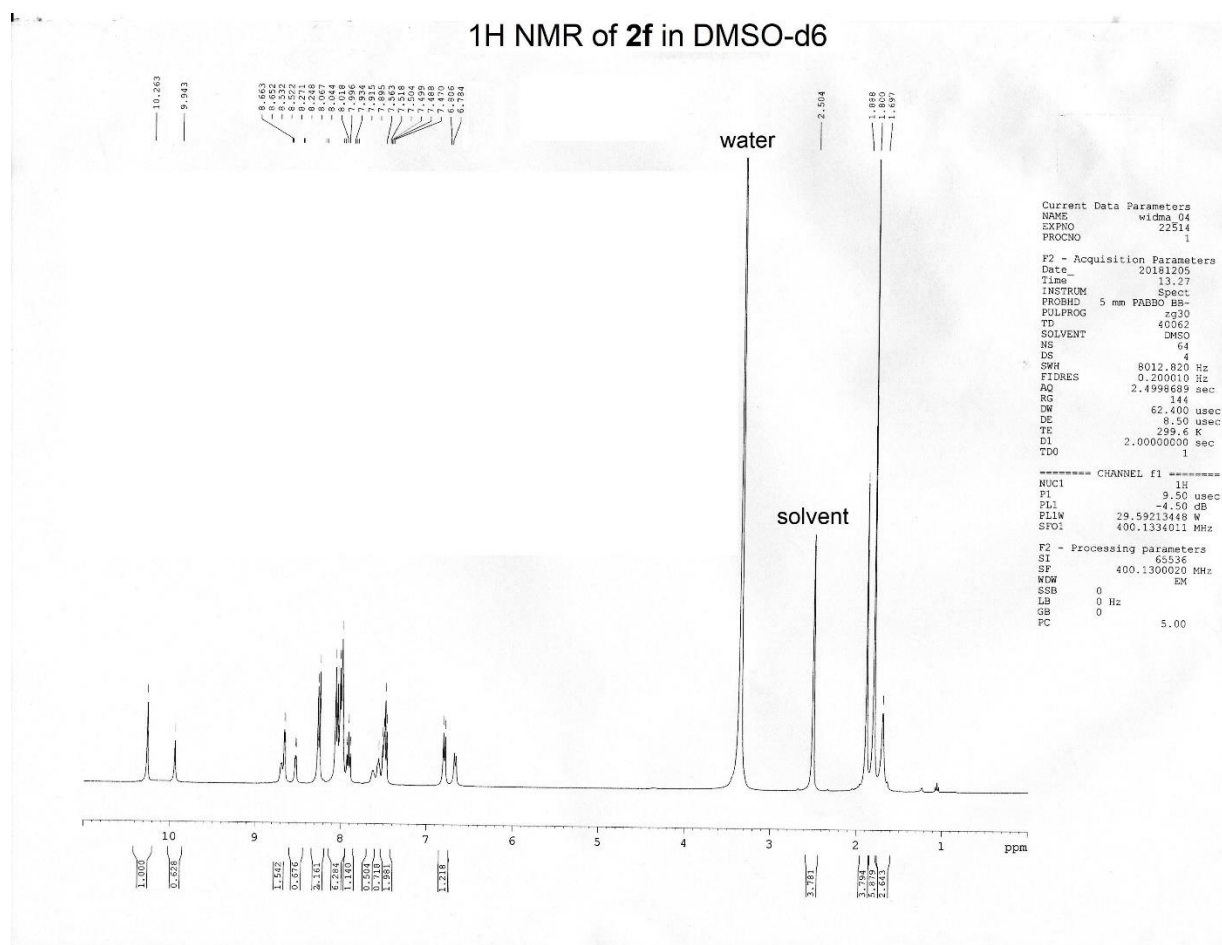

Figure S45. <sup>1</sup>H NMR spectrum of **2f** (in DMSO-d<sub>6</sub>), with enlarged fragment at the top



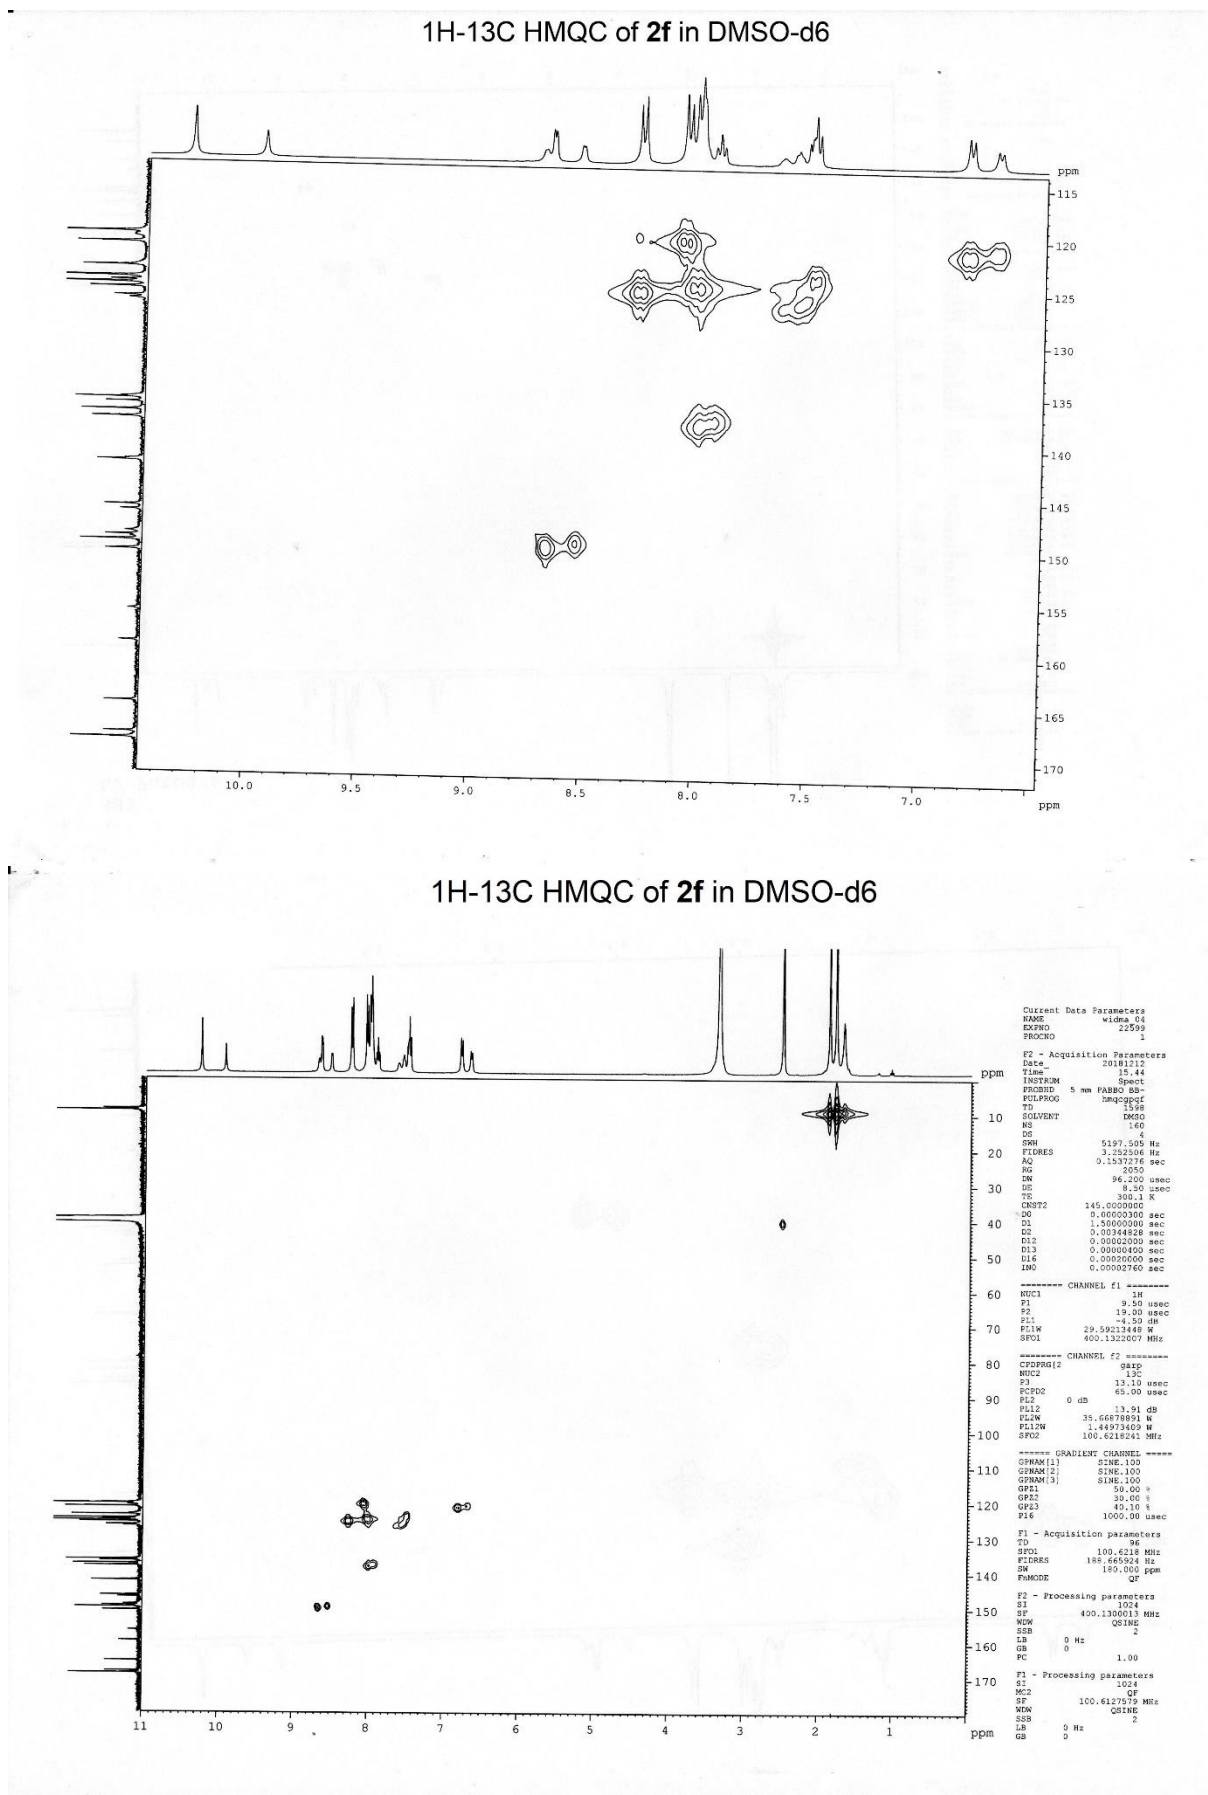

Figure S47.  $^1\text{H}$ - $^{13}\text{C}$  HMQC spectrum of **2f** (in DMSO- $d_6$ ), with enlarged fragment at the top



<sup>1</sup>H-<sup>13</sup>C HMBC of **2f** in DMSO-d<sub>6</sub>

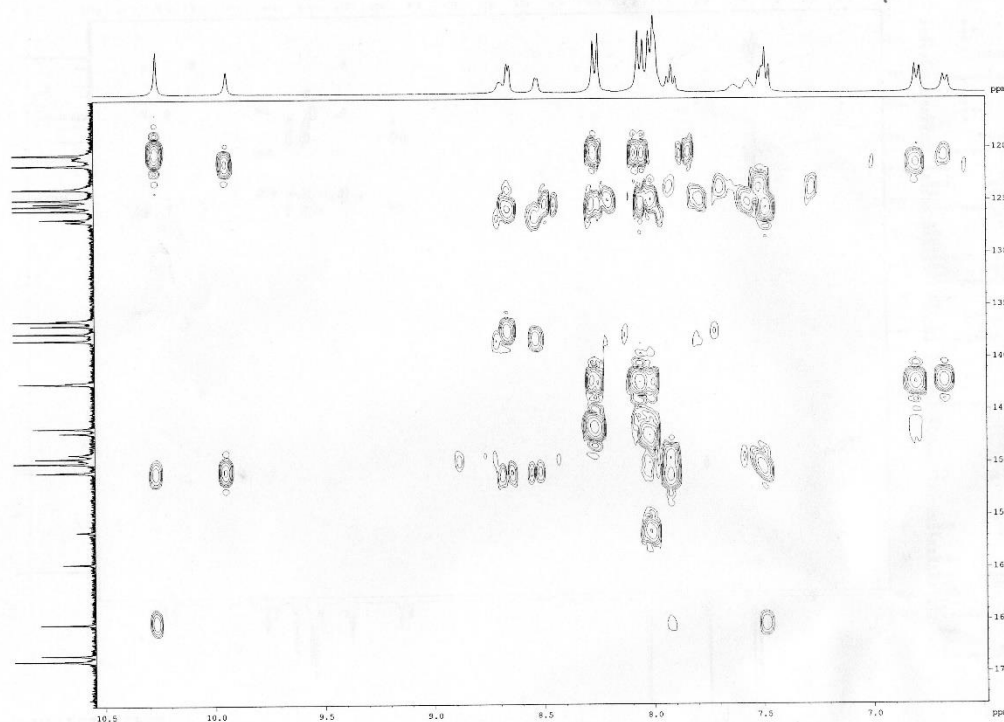

<sup>1</sup>H-<sup>13</sup>C HMBC of **2f** in DMSO-d<sub>6</sub>

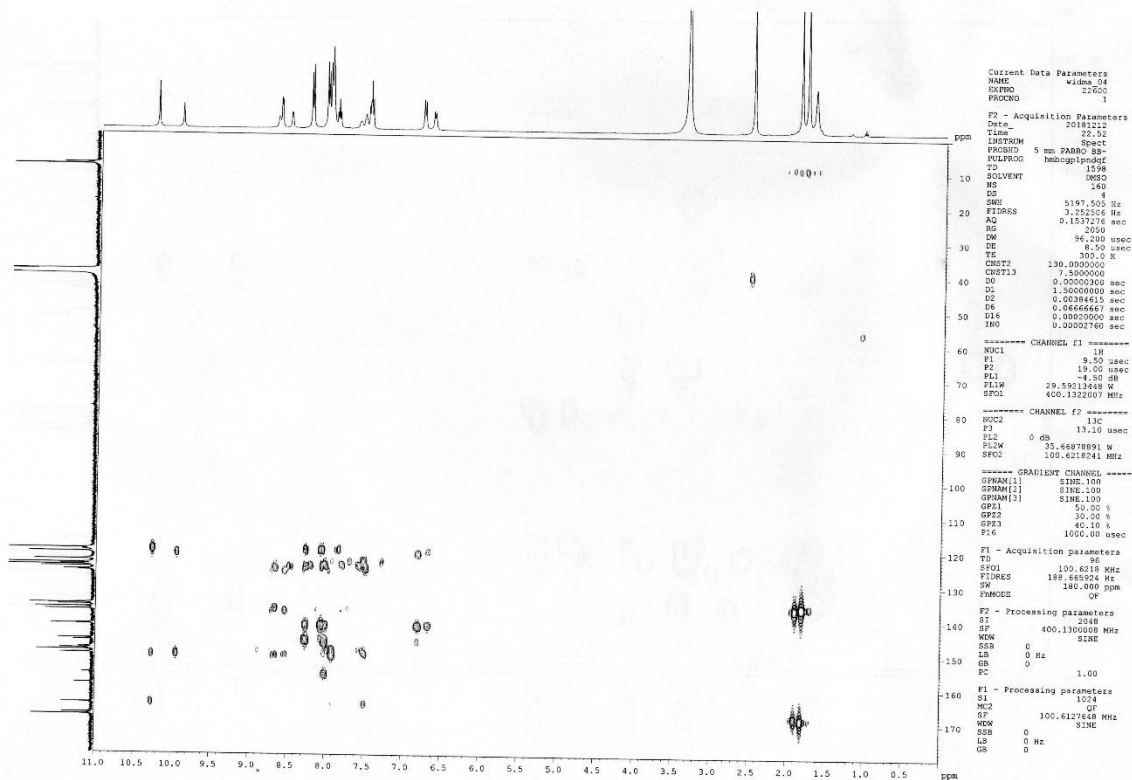

Figure S48. <sup>1</sup>H-<sup>13</sup>C HMBC spectrum of **2f** (in DMSO-d<sub>6</sub>), with enlarged fragment at the top



## PART D. $^1\text{H}$ AND $^{13}\text{C}$ NMR DATA OF 1a-1f and 2a-2f (A, B ISOMERS)

COMPOUND 1a ( $\text{R}^1 = \text{R}^2 = \text{phenyl}$ )

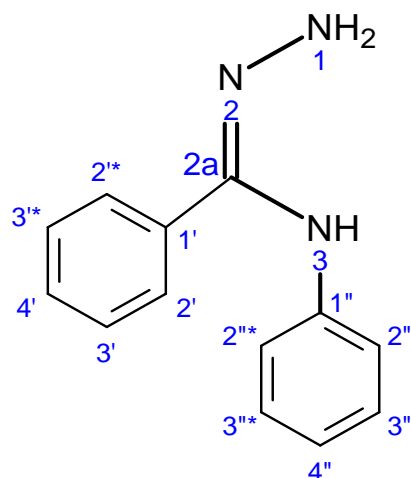

### $^1\text{H}$ NMR

*Aliphatic chain*

H(1), *i.e.*  $\text{NH}_2$ : 6.15

H(3), *i.e.* NH: 7.74

*Phenyl ring (C(2a)-bonded)*

H(2',2''): 7.52; correlates with C(2a), C(2'',2'), C(4')

H(3',3''): 7.30; correlates with C(1'), C(3'',3')

H(4'): 7.25; correlates with C(2'',2'')

*Phenyl ring (N(3)-bonded)*

H(2'',2''): 6.56; correlates with C(2'',2''), C(4'')

H(3'',3''): 7.10; correlates with C(1''), C(3'',3'')

H(4''): 6.70; correlates with C(2'',2'')

### $^{13}\text{C}$ NMR

*Aliphatic chain*

C(2a), *i.e.*  $>\text{C}=\text{}$ : 138.9; correlates with H(2'',2'')

*Phenyl ring (C(2a)-bonded)*

C(1'), *i.e.* C: 136.3; correlates with H(3',3'')

C(2'',2''), *i.e.* 2 x CH: 126.5; correlates with H(2'',2''), H(4')

C(3'',3''), *i.e.* 2 x CH: 128.6; correlates with H(3'',3'')

C(4'), *i.e.* CH: 128.1; correlates with H(2'',2'')

*Phenyl ring (N(3)-bonded)*

C(1''), *i.e.* C: 143.7; correlates with H(3'',3'')

C(2'',2''), *i.e.* 2 x CH: 116.2; correlates with H(2'',2''), H(4'')

C(3'',3''), *i.e.* 2 x CH: 129.2; correlates with H(3'',3'')

C(4''), *i.e.* CH: 119.0; correlates with H(2'',2'')

**COMPOUND 1b** ( $R^1 = 2\text{-pyridyl}$ ,  $R^2 = \text{phenyl}$ )

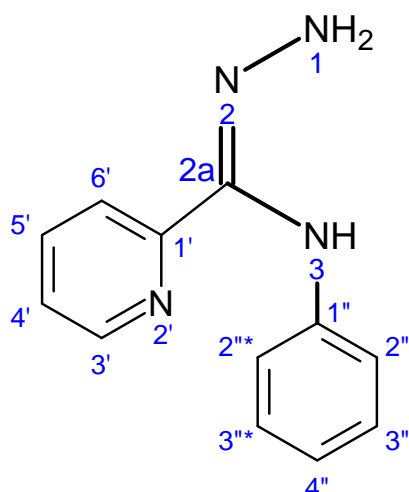

### **<sup>1</sup>H NMR**

#### *Aliphatic chain*

H(1), *i.e.* NH<sub>2</sub>: 6.23

H(3), *i.e.* NH: 7.82

#### *2-pyridyl ring (C(2a)-bonded)*

H(3'): 8.46; correlates with C(1'), C(4'), C(5')

H(4'): 7.27; correlates with C(3'), C(6')

H(5'): 7.77; correlates with C(1'), C(3')

H(6'): 7.91; correlates with C(2a), C(4')

#### *Phenyl ring (N(3)-bonded)*

H(2'',2''\*): 6.62; correlates with C(2''\*,2''), C(4'')

H(3'',3''\*): 7.14; correlates with C(1''), C(3''\*,3'')

H(4''): 6.74; correlates with C(2'',2''\*)

### **<sup>13</sup>C NMR**

#### *Aliphatic chain*

C(2a), *i.e.* >C=: 138.1; correlates with H(6')

#### *2-pyridyl ring (C(2a)-bonded)*

C(1'), *i.e.* C: 153.9; correlates with H(3'), H(5')

C(3'), *i.e.* CH: 148.6; correlates with H(4'), H(5')

C(4'), *i.e.* CH: 123.0; correlates with H(3'), H(6')

C(5'), *i.e.* CH: 136.9; correlates with H(3')

C(6'), *i.e.* CH: 120.4; correlates with H(4')

#### *Phenyl ring (N(3)-bonded)*

C(1''), *i.e.* C: 142.5; correlates with H(3'',3''\*)

C(2'',2''\*), *i.e.* 2 x CH: 117.0; correlates with H(2''\*,2''), H(4'')

C(3'',3''\*), *i.e.* 2 x CH: 128.9; correlates with H(3''\*,3'')

C(4''), *i.e.* CH: 119.5; correlates with H(2'',2''\*)

**COMPOUND 1c** ( $R^1 = 4\text{-pyridyl}$ ,  $R^2 = \text{phenyl}$ )

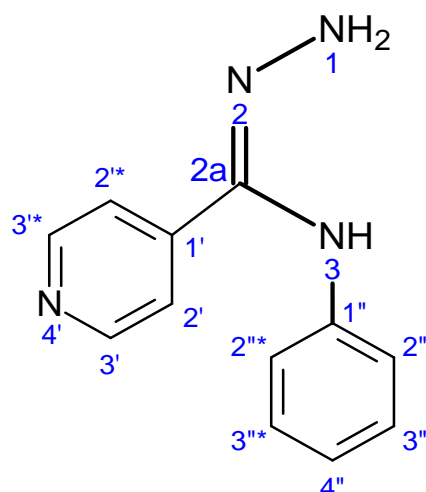

### **<sup>1</sup>H NMR**

*Aliphatic chain*

H(1), *i.e.* NH<sub>2</sub>: 6.74

H(3), *i.e.* NH: 7.74

*4-pyridyl ring (C(2a)-bonded)*

H(2',2'\*): 7.42; correlates with C(2a), C(2'',2''), C(3',3'\*)

H(3',3'\*): 8.46; correlates with C(1'), C(2',2''), C(3'',3'')

*Phenyl ring (N(3)-bonded)*

H(2'',2''): 6.53; correlates with C(2'',2''), C(4'')

H(3'',3''): 7.12; correlates with C(1''), C(3'',3'')

H(4''): 6.71; correlates with C(2'',2'')

### **<sup>13</sup>C NMR**

*Aliphatic chain*

C(2a), *i.e.* >C=: 135.3; correlates with H(2',2'\*)

*4-pyridyl ring (C(2a)-bonded)*

C(1'), *i.e.* C: 143.8; correlates with H(3',3'\*)

C(2',2''), *i.e.* CH: 120.3; correlates with H(2'',2''), H(3',3'\*)

C(3',3''), *i.e.* CH: 150.0; correlates with H(2',2''), H(3'',3'')

*Phenyl ring (N(3)-bonded)*

C(1''), *i.e.* C: 143.5; correlates with H(3'',3'')

C(2'',2''), *i.e.* 2 x CH: 115.7; correlates with H(2'',2''), H(4'')

C(3'',3''), *i.e.* 2 x CH: 129.4; correlates with H(3'',3'')

C(4''), *i.e.* CH: 119.1; correlates with H(2'',2'')

**COMPOUND 1d** ( $R^1 = 2\text{-pyridyl}$ ,  $R^2 = 2\text{-pyridyl}$ )

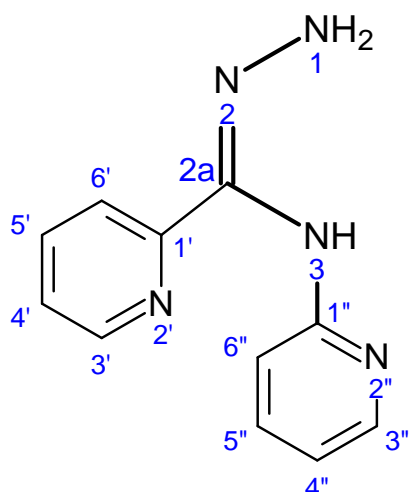

### **<sup>1</sup>H NMR**

#### *Aliphatic chain*

H(1), *i.e.* NH<sub>2</sub>: 6.60

H(3), *i.e.* NH: 8.42

#### *2-pyridyl ring (C(2a)-bonded)*

H(3'): 8.43; correlates with C(1'), C(4'), C(5')

H(4'): 7.26; correlates with C(3'), C(6')

H(5'): 7.76; correlates with C(1'), C(3')

H(6'): 7.90; correlates with C(2a), C(4')

#### *2-pyridyl ring (N(3)-bonded)*

H(3''): 8.03; correlates with C(1''), C(4''), C(5'')

H(4''): 6.71; correlates with C(3''), C(6'')

H(5''): 7.53; correlates with C(1''), C(3'')

H(6''): 6.70; correlates with C(4'')

### **<sup>13</sup>C NMR**

#### *Aliphatic chain*

C(2a), *i.e.* >C=: 136.9; correlates with H(6')

#### *2-pyridyl ring (C(2a)-bonded)*

C(1'), *i.e.* C: 154.1; correlates with H(3'), H(5')

C(3'), *i.e.* CH: 148.4; correlates with H(4'), H(5')

C(4'), *i.e.* CH: 122.9; correlates with H(3'), H(6')

C(5'), *i.e.* CH: 136.8; correlates with H(3')

C(6'), *i.e.* CH: 120.5; correlates with H(4')

#### *2-pyridyl ring (N(3)-bonded)*

C(1''), *i.e.* C: 155.7; correlates with H(3''), H(5'')

C(3''), *i.e.* CH: 147.8; correlates with H(4''), H(5'')

C(4''), *i.e.* CH: 114.9; correlates with H(3''), H(6'')

C(5''), *i.e.* CH: 137.8; correlates with H(3'')

C(6''), *i.e.* CH: 110.9; correlates with H(4'')

**COMPOUND 1e** ( $R^1 = 2\text{-pyridyl}$ ,  $R^2 = 4\text{-methylphenyl}$ )

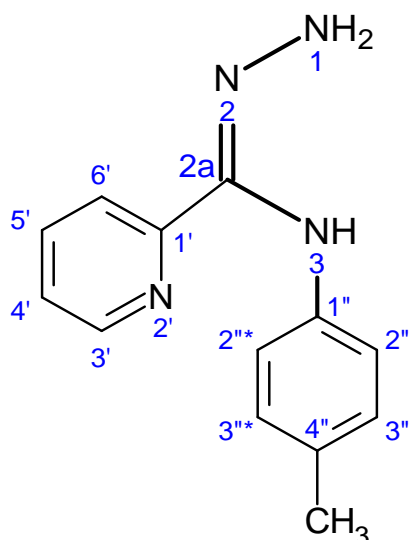

### <sup>1</sup>H NMR

*Aliphatic chain*

H(1), *i.e.* NH<sub>2</sub>: 6.12

H(3), *i.e.* NH: 7.72

*2-pyridyl ring (C(2a)-bonded)*

H(3'): 8.45; correlates with C(1'), C(4'), C(5')

H(4'): 7.27; correlates with C(3'), C(6')

H(5'): 7.77; correlates with C(1'), C(3')

H(6'): 7.90; correlates with C(2a), C(4')

*4-methylphenyl ring (N(3)-bonded)*

H(2'',2''): 6.53; correlates with C(2'',2''), C(4'')

H(3'',3''): 6.95; correlates with C(1''), C(3'',3''), CH<sub>3</sub>

CH<sub>3</sub>: 2.18; correlates with C(3'',3'')

### <sup>13</sup>C NMR

*Aliphatic chain*

C(2a), *i.e.* >C=: 138.4; correlates with H(6')

*2-pyridyl ring (C(2a)-bonded)*

C(1'), *i.e.* C: 153.8; correlates with H(3'), H(5')

C(3'), *i.e.* CH: 148.5; correlates with H(4'), H(5')

C(4'), *i.e.* CH: 123.0; correlates with H(3'), H(6')

C(5'), *i.e.* CH: 136.9; correlates with H(3')

C(6'), *i.e.* CH: 120.4; correlates with H(4')

*4-methylphenyl ring (N(3)-bonded)*

C(1''), *i.e.* C: 139.8; correlates with H(3'',3'')

C(2'',2''), *i.e.* 2 x CH: 117.3; correlates with H(2'',2'')

C(3'',3''), *i.e.* 2 x CH: 129.3; correlates with H(3'',3''), CH<sub>3</sub>

C(4''), *i.e.* C: 128.3; correlates with H(2'',2'')

CH<sub>3</sub>: 20.6; correlates with H(3'',3'')



**COMPOUND 1f** ( $R^1 = 2\text{-pyridyl}$ ,  $R^2 = 4\text{-nitrophenyl}$ )

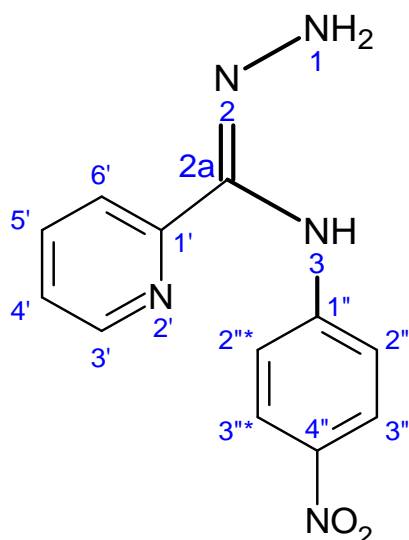

### **<sup>1</sup>H NMR**

#### *Aliphatic chain*

H(1), *i.e.* NH<sub>2</sub>: 6.80

H(3), *i.e.* NH: 8.86

#### *2-pyridyl ring (C(2a)-bonded)*

H(3'): 8.45; correlates with C(1'), C(4'), C(5')

H(4'): 7.27; correlates with C(3'), C(6')

H(5'): 7.79; correlates with C(1'), C(3')

H(6'): 7.90; correlates with C(2a), C(4')

#### *4-nitrophenyl ring (N(3)-bonded)*

H(2'',2''\*): 6.63; correlates with C(2'',2''\*), C(4'')

H(3'',3''\*): 8.05; correlates with C(1''), C(3'',3''\*), C(4'')

### **<sup>13</sup>C NMR**

#### *Aliphatic chain*

C(2a), *i.e.* >C=: 135.0; correlates with H(6')

#### *2-pyridyl ring (C(2a)-bonded)*

C(1'), *i.e.* C: 153.5; correlates with H(3'), H(5')

C(3'), *i.e.* CH: 148.8; correlates with H(4'), H(5')

C(4'), *i.e.* CH: 123.0; correlates with H(3'), H(6')

C(5'), *i.e.* CH: 137.0; correlates with H(3')

C(6'), *i.e.* CH: 120.3; correlates with H(4')

#### *4-nitrophenyl ring (N(3)-bonded)*

C(1''), *i.e.* C: 150.4; correlates with H(3'',3''\*)

C(2'',2''\*), *i.e.* 2 x CH: 115.1; correlates with H(2'',2''\*)

C(3'',3''\*), *i.e.* 2 x CH: 125.8; correlates with H(3'',3''\*)

C(4''), *i.e.* C: 138.6; correlates with H(2'',2''\*), H(3'',3''\*)

**COMPOUND 2a** ( $R^1 = R^2 = \text{phenyl}$ )

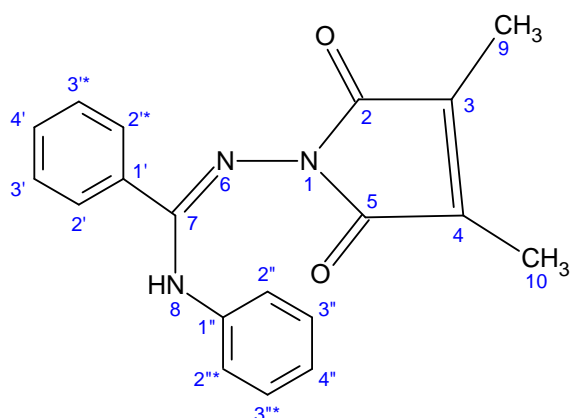

**<sup>1</sup>H NMR**

*Aliphatic chain+3,4-dimethyl-1H-pyrrole-2,5-dione ring*

H(8), *i.e.* NH: **A** – 9.54, **B** – 9.23 (61% : 39%); correlates with C(7), C(1'), C(2'',2''')

3 x H(9,10), *i.e.* 2 x CH<sub>3</sub>: **A** – 1.76, **B** – 1.87 (61% : 39%); correlates with C(2,5), C(3,4)

*Phenyl ring (C(7)-bonded)*

H(2',2''): **A** – 7.53, **B** – 7.32; correlates with C(7), C(2'',2'''), C(4')

H(3',3''): **A** – 7.44, **B** – 7.37; correlates with C(1'), C(3'',3''')

H(4'): **A** – 7.43, **B** – 7.28; correlates with C(2',2'')

*Phenyl ring (N(8)-bonded)*

H(2'',2'''): **A** – 7.80, **B** – 6.74; correlates with C(1''), C(2''',2'''), C(4'')

H(3'',3'''): **A** – 7.30, **B** – 7.14; correlates with C(1''), C(2'',2'''), C(3''',3''')

H(4''): **A** – 7.04, **B** – 6.96; correlates with C(2'',2'''), C(3'',3''')

**<sup>13</sup>C NMR**

*Aliphatic chain+3,4-dimethyl-1H-pyrrole-2,5-dione ring*

C(2,5), *i.e.* 2 x CO: **A** – 169.4, **B** – 168.9; correlates with H(9,10)

C(3,4), *i.e.* 2 x >C=: **A** – 135.8, **B** – 136.2; correlates with H(9,10)

C(7), *i.e.* >C=: **A** – 168.5, **B** – 162.8; correlates with H(8), H(2',2'')

C(9,10), *i.e.* 2 x CH<sub>3</sub>: **A** – 8.9, **B** – 9.0; no correlation

*Phenyl ring (C(7)-bonded)*

C(1'), *i.e.* C: **A** – 133.8, **B** – 133.5; correlates with H(8), H(3',3'')

C(2',2''), *i.e.* 2 x CH: **A** – 128.9, **B** – 129.6; correlates with H(2'',2'''), H(4')

C(3',3''), *i.e.* 2 x CH: **A** – 128.7, **B** – 127.5; correlates with H(3'',3''')

C(4'), *i.e.* CH: **A** – 130.3, **B** – 131.2; correlates with H(2',2'')

*Phenyl ring (N(8)-bonded)*

C(1''), *i.e.* C: **A** – 140.6, **B** – 140.4; correlates with H(2'',2'''), H(3'',3''')

C(2'',2'''), *i.e.* 2 x CH: **A** – 121.0, **B** – 123.5; correlates with H(8), H(2''',2'''), H(3''',3'''), H(4'')

C(3'',3'''), *i.e.* 2 x CH: **A** and **B** – 2 x 128.9; correlates with H(3''',3'''), H(4'')

C(4''), *i.e.* CH: **A** – 123.4, **B** – 124.0; correlates with H(2'',2''')

**COMPOUND 2b** ( $R^1 = 2\text{-pyridyl}$ ,  $R^2 = \text{phenyl}$ )

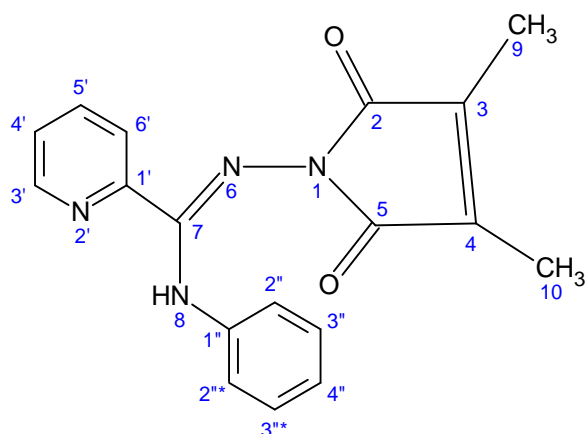

### <sup>1</sup>H NMR

*Aliphatic chain+3,4-dimethyl-1H-pyrrole-2,5-dione ring*

H(8), *i.e.* NH: **A** – 9.57, **B** – 9.50 (43% : 57%); correlates with C(7), C(1'), C(2'',2''\*)

3 x H(9,10), *i.e.* 2 x CH<sub>3</sub>: **A** – 1.77, **B** – 1.73 (43% : 57%); correlates with C(2,5), C(3,4)

*2-pyridyl ring*

H(3'): **A** – 8.61, **B** – 8.58; correlates with C(1'), C(4'), C(5')

H(4'): **A** – 7.45, **B** – 7.55; correlates with C(3'), C(6')

H(5'): **A** – 7.87, **B** – 7.95; correlates with C(1'), C(3')

H(6'): **A** – 7.40, **B** – 8.02; correlates with C(7), C(1'), C(4')

*Phenyl ring*

H(2'',2''\*): **A** – 7.80, **B** – 6.76; correlates with C(1''), C(2''\*,2''), C(4'')

H(3'',3''\*): **A** – 7.32, **B** – 7.14; correlates with C(1''), C(2'',2''\*), C(3''\*,3'')

H(4''): **A** – 7.05, **B** – 7.00; correlates with C(2'',2''\*), C(3'',3''\*)

### <sup>13</sup>C NMR

*Aliphatic chain+3,4-dimethyl-1H-pyrrole-2,5-dione ring*

C(2,5), *i.e.* 2 x CO: **A** – 169.2, **B** – 168.2; correlates with H(9,10)

C(3,4), *i.e.* 2 x >C=: **A** – 135.9, **B** – 135.7; correlates with H(9,10)

C(7), *i.e.* >C=: **A** – 165.5, **B** – 158.5; correlates with H(8), H(2')

C(9,10), *i.e.* 2 x CH<sub>3</sub>: **A** – 8.9, **B** – 8.8; no correlation

*2-pyridyl ring*

C(1'), *i.e.* C: **A** – 151.6, **B** – 151.1; correlates with H(8), H(3'), H(5'), H(6')

C(3'), *i.e.* CH: **A** – 149.7, **B** – 149.0; correlates with H(4'), H(5')

C(4'), *i.e.* CH: **A** – 125.3, **B** – 126.2; correlates with H(3'), H(6')

C(5'), *i.e.* CH: **A** – 137.2, **B** – 137.8; correlates with H(3')

C(6'), *i.e.* CH: **A** – 123.5, **B** – 124.0; correlates with H(4')

*Phenyl ring*

C(1''), *i.e.* C: **A** – 140.4, **B** – 139.1; correlates with H(2'',2''\*), H(3'',3''\*)

C(2'',2''\*), *i.e.* 2 x CH: **A** – 120.9, **B** – 124.4; correlates with H(8), H(2''\*,2''), H(3'',3''\*), H(4'')

C(3'',3''\*), *i.e.* 2 x CH: **A** – 129.0, **B** – 128.4; correlates with H(3''\*,3''), H(4'')

C(4''), *i.e.* CH: **A** – 123.4, **B** – 124.7; correlates with H(2'',2''\*)

**COMPOUND 2c** ( $R^1 = 4\text{-pyridyl}$ ,  $R^2 = \text{phenyl}$ )

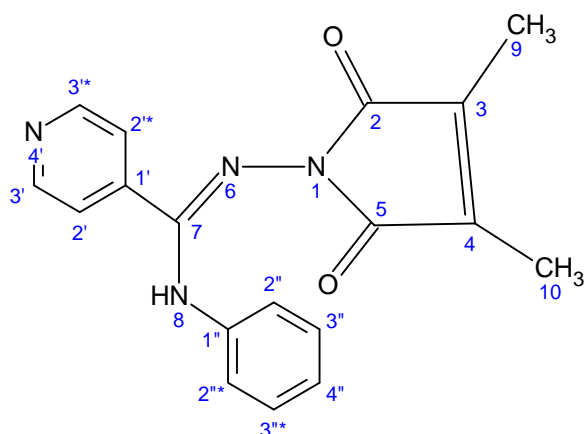

### <sup>1</sup>H NMR

*Aliphatic chain+3,4-dimethyl-1H-pyrrole-2,5-dione ring*

H(8), *i.e.* NH: **A** – 9.71, **B** – 9.46 (63% : 37%); correlates with C(7), C(1'), C(2'',2''')

3 x H(9,10), *i.e.* 2 x CH<sub>3</sub>: **A** – 1.77, **B** – 1.87 (62% : 38%); correlates with C(2,5), C(3,4)

*4-pyridyl ring*

H(2',2''): **A** – 7.28, **B** – 7.46; correlates with C(1'), C(2'',2'''), C(3',3''')

H(3',3'''): **A** – 8.65, **B** – 8.60; correlates with C(7), C(1'), C(2',2''), C(3'',3''')

*Phenyl ring*

H(2'',2'''): **A** – 7.76, **B** – 6.76; correlates with C(1''), C(2'',2'''), C(4'')

H(3'',3'''): **A** – 7.33, **B** – 7.17; correlates with C(1''), C(2'',2'''), C(3'',3''')

H(4''): **A** – 7.07, **B** – 7.01; correlates with C(2'',2'''), C(3'',3''')

### <sup>13</sup>C NMR

*Aliphatic chain+3,4-dimethyl-1H-pyrrole-2,5-dione ring*

C(2,5), *i.e.* 2 x CO: **A** – 169.3, **B** – 168.6; correlates with H(9,10)

C(3,4), *i.e.* 2 x >C=: **A** – 136.2, **B** – 136.4; correlates with H(9,10)

C(7), *i.e.* >C=: **A** – 166.2, **B** – 160.9; correlates with H(8), H(2')

C(9,10), *i.e.* 2 x CH<sub>3</sub>: **A** – 9.0, **B** – 8.9; no correlation

*4-pyridyl ring*

C(1'), *i.e.* C: **A** and **B** – 2 x 141.3; correlates with H(8), H(2',2''), H(3',3''')

C(2',2''), *i.e.* 2 x CH: **A** – 122.2, **B** – 123.7; correlates with H(2'',2'''), H(3'',3''')

C(3',3''') *i.e.* 2 x CH: **A** – 150.2, **B** – 150.4; correlates with H(2',2''), H(3'',3''')

*Phenyl ring*

C(1''), *i.e.* C: **A** – 140.2, **B** – 139.6; correlates with H(2'',2'''), H(3'',3''')

C(2'',2'''), *i.e.* 2 x CH: **A** – 121.0, **B** – 123.9; correlates with H(8), H(2'',2'''), H(3'',3'''), H(4'')

C(3'',3'''), *i.e.* 2 x CH: **A** and **B** – 2 x 129.1; correlates with H(3'',3'''), H(4'')

C(4''), *i.e.* CH: **A** – 123.7, **B** – 124.6; correlates with H(2'',2''')

**COMPOUND 2d** ( $R^1 = R^2 = 2\text{-pyridyl}$ )

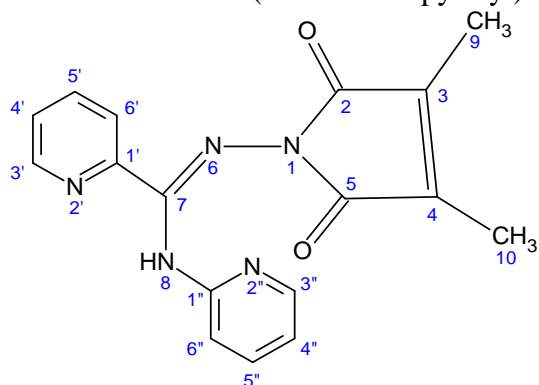

**$^1\text{H}$  NMR**

*Aliphatic chain+3,4-dimethyl-1H-pyrrole-2,5-dione ring*

H(8), *i.e.* NH: **A** – 9.95, **B** – 9.84 (20% : 80%); correlates with C(7), C(1'), C(6'')

3 x H(9,10), *i.e.* 2 x CH<sub>3</sub>: **A** – 1.78, **B** – 1.88 (22% : 78%); correlates with C(2,5), C(3,4)

*2-pyridyl ring (C(7)-bonded)*

H(3'): **A** – 8.58, **B** – 8.41; correlates with C(1'), C(4'), C(5')

H(4'): **A** – 7.38, **B** – 7.45; correlates with C(3'), C(6')

H(5'): **A** – 7.95, **B** – 7.85; correlates with C(1'), C(3')

H(6'): **A** – 8.12, **B** – 7.89; correlates with C(7), C(1'), C(4')

*2-pyridyl ring (N(8)-bonded)*

H(3''): **A** – 8.26, **B** – 7.91; correlates with C(1''), C(4''), C(5'')

H(4''): **A** – 7.09, **B** – 6.87; correlates with C(3''), C(6'')

H(5''): **A** – 7.56, **B** – 7.57; correlates with C(1''), C(3'')

H(6''): **A** – 8.17, **B** – 6.80; correlates with C(1''), C(4'')

**$^{13}\text{C}$  NMR**

*Aliphatic chain+3,4-dimethyl-1H-pyrrole-2,5-dione ring*

C(2,5), *i.e.* 2 x CO: **A** – 168.9, **B** – 168.4; correlates with H(9,10)

C(3,4), *i.e.* 2 x >C=: **A** – 136.2, **B** – 136.4; correlates with H(9,10)

C(7), *i.e.* >C=: **A** – 164.8, **B** – 160.3; correlates with H(8), H(2')

C(9,10), *i.e.* 2 x CH<sub>3</sub>: **A** and **B** – 2 x 9.0; no correlation

*2-pyridyl ring (C(7)-bonded)*

C(1'), *i.e.* C: **A** – 150.7, **B** – 152.4; correlates with H(8), H(3'), H(5'), H(6')

C(3'), *i.e.* CH: **A** – 149.7, **B** – 148.6; correlates with H(4'), H(5')

C(4'), *i.e.* CH: **A** – 125.0, **B** – 125.5; correlates with H(3'), H(6')

C(5'), *i.e.* CH: **A** and **B** – 2 x 137.4; correlates with H(3')

C(6'), *i.e.* CH: **A** and **B** – 2 x 124.3; correlates with H(4')

*2-pyridyl ring (N(8)-bonded)*

C(1''), *i.e.* C: **A** – 152.7, **B** – 154.0; correlates with H(3''), H(5''), H(6'')

C(3''), *i.e.* CH: **A** – 148.6, **B** – 147.6; correlates with H(4''), H(5'')

C(4''), *i.e.* CH: **A** – 119.4, **B** – 118.6; correlates with H(3''), H(6'')

C(5''), *i.e.* CH: **A** and **B** – 2 x 137.8; correlates with H(3'')

C(6''), *i.e.* CH: **A** – 115.2, **B** – 115.3; correlates with H(8), H(4'')



**COMPOUND 2e** ( $R^1 = 2\text{-pyridyl}$ ,  $R^2 = 4\text{-methylphenyl}$ )

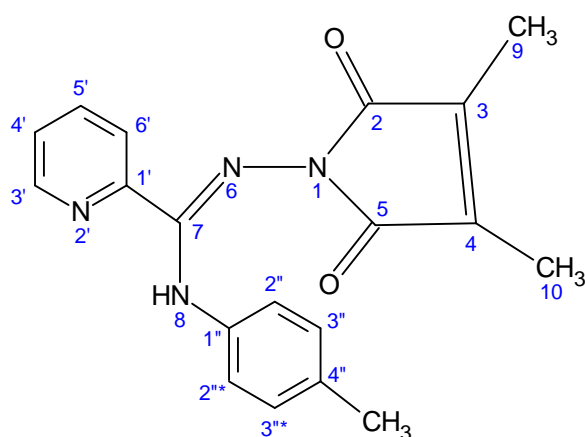

### $^1\text{H NMR}$

*Aliphatic chain+3,4-dimethyl-1H-pyrrole-2,5-dione ring*

H(8), *i.e.* NH: **A** – 9.47, **B** – 9.42 (20% : 80%); correlates with C(7), C(1'), C(2'',2''\*)

3 x H(9,10), *i.e.* 2 x CH<sub>3</sub>: **A** – 1.76, **B** – 1.72 (23% : 77%); correlates with C(2,5), C(3,4)

*2-pyridyl ring*

H(3'): **A** – 8.59, **B** – 8.58; correlates with C(1'), C(4'), C(5')

H(4'): **A** – 7.44, **B** – 7.54; correlates with C(3'), C(6')

H(5'): **A** – 7.86, **B** – 7.94; correlates with C(1'), C(3')

H(6'): **A** – 7.37, **B** – 8.01; correlates with C(7), C(1'), C(4')

*4-methylphenyl ring*

H(2'',2''\*): **A** – 7.67, **B** – 6.65; correlates with C(2''\*,2''), C(4'')

H(3'',3''\*): **A** – 7.13, **B** – 6.94; correlates with C(1''), C(3''\*,3''), CH<sub>3</sub>

CH<sub>3</sub>: **A** – 2.26, **B** – 2.18; correlates with C(3'',3''\*), C(4'')

### $^{13}\text{C NMR}$

*Aliphatic chain+3,4-dimethyl-1H-pyrrole-2,5-dione ring*

C(2,5), *i.e.* 2 x CO: **A** – 169.2, **B** – 168.6; correlates with H(9,10)

C(3,4), *i.e.* 2 x >C=: **A** – 135.9, **B** – 135.6; correlates with H(9,10)

C(7), *i.e.* >C=: **A** – 165.4, **B** – 158.6; correlates with H(8), H(2')

C(9,10), *i.e.* 2 x CH<sub>3</sub>: **A** – 8.9, **B** – 8.7; no correlation

*2-pyridyl ring*

C(1'), *i.e.* C: **A** – 151.7, **B** – 151.1; correlates with H(8), H(3'), H(5'), H(6')

C(3'), *i.e.* CH: **A** – 149.6, **B** – 148.9; correlates with H(4'), H(5')

C(4'), *i.e.* CH: **A** – 125.2, **B** – 126.1; correlates with H(3'), H(6')

C(5'), *i.e.* CH: **A** – 137.2, **B** – 137.8; correlates with H(3')

C(6'), *i.e.* CH: **A** – 123.4, **B** – 123.9; correlates with H(4')

*4-methylphenyl ring*

C(1''), *i.e.* C: **A** – 137.9, **B** – 136.4; correlates with H(3'',3''\*)

C(2'',2''\*), *i.e.* 2 x CH: **A** – 120.9, **B** – 124.7; correlates with H(8), H(2'',2'')

C(3'',3''\*), *i.e.* 2 x CH: **A** – 129.4, **B** – 128.9; correlates with H(3''\*,3''), CH<sub>3</sub>

C(4''), *i.e.* C: **A** – 132.4, **B** – 134.3; correlates with H(2'',2''\*), CH<sub>3</sub>

CH<sub>3</sub>: **A** – 20.9, **B** – 20.8; correlates with H(3'',3''\*)

**COMPOUND 2f** ( $R^1 = 2\text{-pyridyl}$ ,  $R^2 = 4\text{-nitrophenyl}$ )

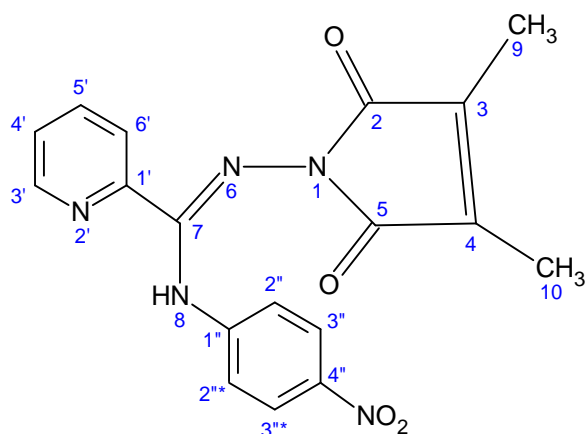

### <sup>1</sup>H NMR

*Aliphatic chain+3,4-dimethyl-1H-pyrrole-2,5-dione ring*

H(8), *i.e.* NH: **A** – 10.26, **B** – 9.94 (61% : 39%); correlates with C(7), C(1'), C(2'',2''\*)

3 x H(9,10), *i.e.* 2 x CH<sub>3</sub>: **A** – 1.80, **B** – 1.89 (61% : 39%); correlates with C(2,5), C(3,4)

*2-pyridyl ring*

H(3'): **A** – 8.66, **B** – 8.53; correlates with C(1'), C(4'), C(5')

H(4'): **A** – 7.50, **B** – 7.56; correlates with C(3'), C(6')

H(5'): **A** – 7.91, **B** – 7.98; correlates with C(1'), C(3')

H(6'): **A** – 7.48, **B** – 7.51; correlates with C(7), C(1'), C(4')

*4-nitrophenyl ring*

H(2'',2''\*): **A** – 8.06, **B** – 6.79; correlates with C(2'',2''\*), C(4'')

H(3'',3''\*): **A** – 8.26, **B** – 8.01; correlates with C(1''), C(3''\*,3'')

### <sup>13</sup>C NMR

*Aliphatic chain+3,4-dimethyl-1H-pyrrole-2,5-dione ring*

C(2,5), *i.e.* 2 x CO: **A** – 168.8, **B** – 168.2; correlates with H(9,10)

C(3,4), *i.e.* 2 x >C=: **A** – 136.3, **B** – 136.7; correlates with H(9,10)

C(7), *i.e.* >C=: **A** – 165.2, **B** – 159.4; correlates with H(8), H(2')

C(9,10), *i.e.* 2 x CH<sub>3</sub>: **A** – 9.0, **B** – 8.6; no correlation

*2-pyridyl ring*

C(1'), *i.e.* C: **A** – 150.8, **B** – 150.7; correlates with H(8), H(3'), H(5'), H(6')

C(3'), *i.e.* CH: **A** – 149.9, **B** – 149.4; correlates with H(4'), H(5')

C(4'), *i.e.* CH: **A** – 125.1, **B** – 126.5; correlates with H(3'), H(6')

C(5'), *i.e.* CH: **A** – 137.4, **B** – 138.1; correlates with H(3')

C(6'), *i.e.* CH: **A** – 123.7, **B** – 125.7; correlates with H(4')

*4-nitrophenyl ring*

C(1''), *i.e.* C: **A** – 146.5, **B** – 147.0; correlates with H(3'',3''\*)

C(2'',2''\*), *i.e.* 2 x CH: **A** – 120.4, **B** – 121.4; correlates with H(8), H(2'',2'')

C(3'',3''\*), *i.e.* 2 x CH: **A** – 125.3, **B** – 124.7; correlates with H(3''\*,3'')

C(4''), *i.e.* C: **A** – 142.3, **B** – 142.2; correlates with H(2'',2''\*)

# **PART E. SUMMARY AND DISCUSSION OF <sup>1</sup>H AND <sup>13</sup>C NMR CHEMICAL SHIFTS FOR 2a-2f (A AND B ISOMERS), COMPARED TO THOSE OF 1a-1f**

Table S8. <sup>1</sup>H NMR chemical shifts for **A** and **B** forms of **2a-2f**, and **1a-1f** (in italics), in DMSO-d<sub>6</sub> (δ<sup>1H</sup>, ppm), at 298 K

| Species/<br>hydrogen    | H(8) <sup>a</sup><br>(NH) | H(9,10)<br>(both<br>CH <sub>3</sub> ) | H(2')<br>(CH)<br><i>i.e.</i><br>H(12) | H(3')<br>(CH)<br><i>i.e.</i><br>H(13) | H(4')<br>(CH)<br><i>i.e.</i><br>H(14) | H(5')<br>(CH)<br><i>i.e.</i><br>H(15) | H(6')<br>(CH)<br><i>i.e.</i><br>H(16) | H(2'')<br>(CH)<br><i>i.e.</i><br>H(22) | H(3'')<br>(CH)<br><i>i.e.</i><br>H(23) | H(4'')<br>(CH)<br><i>i.e.</i><br>H(24) | H(5'')<br>(CH)<br><i>i.e.</i><br>H(25) | H(6'')<br>(CH)<br><i>i.e.</i><br>H(26) |
|-------------------------|---------------------------|---------------------------------------|---------------------------------------|---------------------------------------|---------------------------------------|---------------------------------------|---------------------------------------|----------------------------------------|----------------------------------------|----------------------------------------|----------------------------------------|----------------------------------------|
| <b>2a A</b> major (61%) | 9.54                      | 1.76                                  | 7.53                                  | 7.44                                  | 7.43                                  | *                                     | **                                    | 7.80                                   | 7.30                                   | 7.04                                   | *                                      | **                                     |
| <b>2a B</b> minor (39%) | 9.23                      | 1.87                                  | 7.32                                  | 7.37                                  | 7.28                                  | *                                     | **                                    | 6.74                                   | 7.14                                   | 6.96                                   | *                                      | **                                     |
| <i>1a</i>               | 7.74                      |                                       | 7.52                                  | 7.30                                  | 7.25                                  | *                                     | **                                    | 6.56                                   | 7.10                                   | 6.70                                   | *                                      | **                                     |
| <b>2b A</b> minor (43%) | 9.57                      | 1.77                                  | no H                                  | 8.61                                  | 7.45                                  | 7.87                                  | 7.40                                  | 7.80                                   | 7.32                                   | 7.05                                   | *                                      | **                                     |
| <b>2b B</b> major (57%) | 9.50                      | 1.73                                  | no H                                  | 8.58                                  | 7.55                                  | 7.95                                  | 8.02                                  | 6.76                                   | 7.14                                   | 7.00                                   | *                                      | **                                     |
| <i>1b</i>               | 7.82                      |                                       | no H                                  | 8.46                                  | 7.27                                  | 7.77                                  | 7.91                                  | 6.62                                   | 7.14                                   | 6.74                                   | *                                      | **                                     |
| <b>2c A</b> major (62%) | 9.71                      | 1.77                                  | 7.28                                  | 8.65                                  | no H                                  | *                                     | **                                    | 7.76                                   | 7.33                                   | 7.07                                   | *                                      | **                                     |
| <b>2c B</b> minor (38%) | 9.46                      | 1.87                                  | 7.46                                  | 8.60                                  | no H                                  | *                                     | **                                    | 6.76                                   | 7.17                                   | 7.01                                   | *                                      | **                                     |
| <i>1c</i>               | 7.74                      |                                       | 7.42                                  | 8.46                                  | no H                                  | *                                     | **                                    | 6.53                                   | 7.12                                   | 6.71                                   | *                                      | **                                     |
| <b>2d A</b> minor (21%) | 9.95                      | 1.78                                  | no H                                  | 8.58                                  | 7.38                                  | 7.95                                  | 8.12                                  | no H                                   | 8.26                                   | 7.09                                   | 7.56                                   | 8.17                                   |
| <b>2d B</b> major (79%) | 9.84                      | 1.88                                  | no H                                  | 8.41                                  | 7.45                                  | 7.85                                  | 7.89                                  | no H                                   | 7.91                                   | 6.87                                   | 7.57                                   | 6.80                                   |
| <i>1d</i>               | 8.42                      |                                       | no H                                  | 8.43                                  | 7.26                                  | 7.76                                  | 7.90                                  | no H                                   | 8.03                                   | 6.71                                   | 7.53                                   | 6.70                                   |
| <b>2e A</b> minor (22%) | 9.47                      | 1.76                                  | no H                                  | 8.59                                  | 7.44                                  | 7.86                                  | 7.37                                  | 7.67                                   | 7.13                                   | no H <sup>b</sup>                      | *                                      | **                                     |
| <b>2e B</b> major (78%) | 9.42                      | 1.72                                  | no H                                  | 8.58                                  | 7.54                                  | 7.94                                  | 8.01                                  | 6.65                                   | 6.94                                   | no H <sup>c</sup>                      | *                                      | **                                     |
| <i>1e</i>               | 7.72                      |                                       | no H                                  | 8.45                                  | 7.27                                  | 7.77                                  | 7.90                                  | 6.53                                   | 6.95                                   | no H <sup>d</sup>                      | *                                      | **                                     |
| <b>2f A</b> major (61%) | 10.26                     | 1.80                                  | no H                                  | 8.66                                  | 7.50                                  | 7.91                                  | 7.48                                  | 8.06                                   | 8.26                                   | no H                                   | *                                      | **                                     |
| <b>2f B</b> minor (39%) | 9.94                      | 1.89                                  | no H                                  | 8.53                                  | 7.56                                  | 7.98                                  | 7.51                                  | 6.79                                   | 8.01                                   | no H                                   | *                                      | **                                     |
| <i>1f</i>               | 8.86                      |                                       | no H                                  | 8.45                                  | 7.27                                  | 7.79                                  | 7.90                                  | 6.63                                   | 8.05                                   | no H                                   | *                                      | **                                     |

\* the H(5') and/or H(5'') signals are identical to the H(3') and/or H(3'') ones, respectively

\*\* the H(6') and/or H(6'') signals are identical to the H(2') and/or H(2'') ones, respectively

<sup>a</sup> in parent amidrazones this hydrogen is numbered as H(3)

<sup>b</sup> CH<sub>3</sub> at 2.26 ppm

<sup>c</sup> CH<sub>3</sub> at 2.18 ppm

<sup>d</sup> CH<sub>3</sub> at 2.18 ppm

Table S9. <sup>13</sup>C NMR chemical shifts for **A** and **B** forms of **2a-2f**, and **1a-1f** (in italics), in DMSO-d<sub>6</sub> (δ<sup>13C</sup>, ppm), at 298 K

| Species           | C(2,5)<br>(both<br>CO) | C(3,4)<br>(both<br>>C=) | C(7) <sup>a</sup><br>(>C=) | C(9,10)<br>(both<br>CH <sub>3</sub> ) | C(1')<br>(C)<br><i>i.e.</i><br>C(11) | C(2')<br>(CH)<br><i>i.e.</i><br>C(12) | C(3')<br>(CH)<br><i>i.e.</i><br>C(13) | C(4')<br>(CH)<br><i>i.e.</i><br>C(14) | C(5')<br>(CH)<br><i>i.e.</i><br>C(15) | C(6')<br>(CH)<br><i>i.e.</i><br>C(16) | C(1'')<br>(C)<br><i>i.e.</i><br>C(21) | C(2'')<br>(CH)<br><i>i.e.</i><br>C(22) | C(3'')<br>(CH)<br><i>i.e.</i><br>C(23) | C(4'')<br>(CH)<br><i>i.e.</i><br>C(24) | C(5'')<br>(CH)<br><i>i.e.</i><br>C(25) | C(6'')<br>(CH)<br><i>i.e.</i><br>C(26) |
|-------------------|------------------------|-------------------------|----------------------------|---------------------------------------|--------------------------------------|---------------------------------------|---------------------------------------|---------------------------------------|---------------------------------------|---------------------------------------|---------------------------------------|----------------------------------------|----------------------------------------|----------------------------------------|----------------------------------------|----------------------------------------|
| <b>2a A</b> major | 169.4                  | 135.8                   | 168.5                      | 8.9                                   | 133.8                                | 128.9                                 | 128.7                                 | 130.3                                 | *                                     | **                                    | 140.6                                 | 121.0                                  | 128.9                                  | 123.4                                  | *                                      | **                                     |
| <b>2a B</b> minor | 168.9                  | 136.2                   | 162.8                      | 9.0                                   | 133.5                                | 129.6                                 | 127.5                                 | 131.2                                 | *                                     | **                                    | 140.4                                 | 123.5                                  | 128.9                                  | 124.0                                  | *                                      | **                                     |
| <i>1a</i>         | no C                   | no C                    | 138.9                      | no C                                  | 136.3                                | 126.5                                 | 128.6                                 | 128.1                                 | *                                     | **                                    | 143.7                                 | 116.2                                  | 129.2                                  | 119.0                                  | *                                      | **                                     |
| <b>2b A</b> minor | 169.2                  | 135.9                   | 165.5                      | 8.9                                   | 151.6                                | no C                                  | 149.7                                 | 125.3                                 | 137.2                                 | 123.5                                 | 140.4                                 | 120.9                                  | 129.0                                  | 123.4                                  | *                                      | **                                     |
| <b>2b B</b> major | 168.2                  | 135.7                   | 158.5                      | 8.8                                   | 151.1                                | no C                                  | 149.0                                 | 126.2                                 | 137.8                                 | 124.0                                 | 139.2                                 | 124.4                                  | 128.4                                  | 124.7                                  | *                                      | **                                     |
| <i>1b</i>         | no C                   | no C                    | 138.1                      | no C                                  | 153.9                                | no C                                  | 148.6                                 | 123.0                                 | 136.9                                 | 120.4                                 | 142.5                                 | 117.0                                  | 128.9                                  | 119.5                                  | *                                      | **                                     |
| <b>2c A</b> major | 169.3                  | 136.2                   | 166.2                      | 9.0                                   | 141.3                                | 122.2                                 | 150.2                                 | no C                                  | *                                     | **                                    | 140.2                                 | 121.0                                  | 129.1                                  | 123.7                                  | *                                      | **                                     |
| <b>2c B</b> minor | 168.6                  | 136.4                   | 160.9                      | 8.9                                   | 141.3                                | 123.7                                 | 150.4                                 | no C                                  | *                                     | **                                    | 139.6                                 | 123.9                                  | 129.1                                  | 124.6                                  | *                                      | **                                     |
| <i>1c</i>         | no C                   | no C                    | 135.3                      | no C                                  | 143.8                                | 120.3                                 | 150.0                                 | no C                                  | *                                     | **                                    | 143.5                                 | 115.7                                  | 129.4                                  | 119.1                                  | *                                      | **                                     |
| <b>2d A</b> minor | 168.9                  | 136.2                   | 164.8                      | 9.0                                   | 150.7                                | no C                                  | 149.7                                 | 125.0                                 | 137.4                                 | 124.3                                 | 152.7                                 | no C                                   | 148.6                                  | 119.4                                  | 137.8                                  | 115.2                                  |
| <b>2d B</b> major | 168.4                  | 136.4                   | 160.3                      | 9.0                                   | 152.4                                | no C                                  | 148.6                                 | 125.5                                 | 137.4                                 | 124.3                                 | 154.0                                 | no C                                   | 147.6                                  | 118.6                                  | 137.8                                  | 115.3                                  |
| <i>1d</i>         | no C                   | no C                    | 136.9                      | no C                                  | 154.1                                | no C                                  | 148.4                                 | 122.9                                 | 136.8                                 | 120.5                                 | 155.7                                 | no C                                   | 147.8                                  | 114.9                                  | 137.8                                  | 110.9                                  |
| <b>2e A</b> minor | 169.2                  | 135.9                   | 165.4                      | 8.9                                   | 151.7                                | no C                                  | 149.6                                 | 125.2                                 | 137.2                                 | 123.4                                 | 137.9                                 | 120.9                                  | 129.4                                  | 132.4 <sup>b</sup>                     | *                                      | **                                     |
| <b>2e B</b> major | 168.6                  | 135.6                   | 158.6                      | 8.7                                   | 151.1                                | no C                                  | 148.9                                 | 126.1                                 | 137.8                                 | 123.9                                 | 136.4                                 | 124.7                                  | 128.9                                  | 134.3 <sup>c</sup>                     | *                                      | **                                     |
| <i>1e</i>         | no C                   | no C                    | 138.4                      | no C                                  | 153.8                                | no C                                  | 148.5                                 | 123.0                                 | 136.9                                 | 120.4                                 | 139.8                                 | 117.3                                  | 129.3                                  | 128.3 <sup>d</sup>                     | *                                      | **                                     |
| <b>2f A</b> major | 168.8                  | 136.3                   | 165.2                      | 9.0                                   | 150.8                                | no C                                  | 149.9                                 | 125.1                                 | 137.4                                 | 123.7                                 | 146.5                                 | 120.4                                  | 125.3                                  | 142.3                                  | *                                      | **                                     |
| <b>2f B</b> minor | 168.2                  | 136.7                   | 159.4                      | 8.6                                   | 150.7                                | no C                                  | 149.4                                 | 126.5                                 | 138.1                                 | 125.7                                 | 147.0                                 | 121.4                                  | 124.7                                  | 142.2                                  | *                                      | **                                     |
| <i>1f</i>         | no C                   | no C                    | 135.0                      | no C                                  | 153.5                                | no C                                  | 148.8                                 | 123.0                                 | 137.0                                 | 120.3                                 | 150.4                                 | 115.1                                  | 125.8                                  | 138.6                                  | *                                      | **                                     |

<sup>a</sup> in parent amidrazones this carbon is numbered as C(2a)

<sup>b</sup> CH<sub>3</sub> 20.9 ppm

<sup>c</sup> CH<sub>3</sub> 20.8 ppm

<sup>d</sup> CH<sub>3</sub> 20.6 ppm

\* the C(5') and/or C(5'') signals are identical to the C(3') and/or C(3'') ones, respectively

\*\* the C(6') and/or C(6'') signals are identical to the C(2') and/or C(2'') ones, respectively

## COMMENTS:

1. The assignment of  $^1\text{H}$  and  $^{13}\text{C}$  NMR signals, based on the  $^1\text{H}$ - $^{13}\text{C}$  HMQC and HMBC correlation analysis (for details see part D), generally refers to the atom numbering scheme shown in Figure 2 and Scheme 1 of the main text; the notation  $1' \gg 6'$  (for  $\text{R}^1$ ) and  $1'' \gg 6''$  (for  $\text{R}^2$ ) concerns the NMR signals, while the analogous  $11 \gg 16$  and  $21 \gg 26$  one – the respective atoms. Then, during comparisons of each two analogous molecules (belonging to the **2a-2f** and **1a-1f** type, respectively) containing the same set of  $\text{R}^1$ ,  $\text{R}^2$  substituents (*i.e.* corresponding to the same letter from the range “a-f”), the generalized symbols **2x** and **1x** (where **x** = **a**, **b**, **c**, **d**, **e**, **f**) are used.

2. The  $^1\text{H}$ - $^{13}\text{C}$  HMQC and HMBC correlation schemes are similar for all **2a-2f** compounds, including both **A** and **B** species (for details see part D). Particularly, in the  $^1\text{H}$ - $^{13}\text{C}$  HMBC spectra the mostly deshielded proton signal of **A** or **B** (each of NH type) always correlates (*via* two or three bonds) with the C(7), C(1') and C(2'') (in **2d** with C(6'')) resonances (although not with the C(1'') one) – which confirms this is N(8)H (and not N(6)H). It excludes the opportunity that **A** and **B** differ in the position of a proton at both concerned nitrogens, which could be possible upon the hypothetical  $-\text{N}(6)=\text{C}(7)-\text{N}(8)\text{H}- \rightleftharpoons -\text{N}(6)\text{H}-\text{C}(7)=\text{N}(8)-$  equilibrium. The presence of N(8)H moiety in **2a-2f** molecules (in both **A** and **B** forms) in the solution is consistent with the results of single crystal X-ray studies for **2a** and **2d**. Moreover, the appearance of  $^1\text{H}$ - $^{13}\text{C}$  correlations over two or three bonds for this amine (N(8)H) proton indicates its immobility (in contrast, for **1a-1f** no such correlations with participation of the analogous N(3)H atom appear, suggesting it is highly mobile). Hence, the observed **A-B** isomerism cannot be caused by any proton transfer, especially between N(6) and N(8). Thus, **2a-2f** molecules seem to be exactly as shown in Figure 2 and Scheme 1 of the main text (taking into account the order of atoms and bonds, not geometry).

3. For **2a** the variable temperature  $^1\text{H}$  NMR measurements were performed. However, heating of the DMSO- $d_6$  solution from 298 K to 323 K did not affect the relative content of **A** and **B** species (298 K – 61% : 39%, 303 K – 60% : 40%, 313 K – 61% : 39%, 323 K – 61% : 39%; determined as averages of the respective  $\text{N}(8)\text{H}^{\text{A}} : \text{N}(8)\text{H}^{\text{B}}$  and  $\text{CH}_3^{\text{A}} : \text{CH}_3^{\text{B}}$  integration areas). Moreover, all  $^1\text{H}$  NMR signals remained sharp and their  $\delta^{\text{H}}$  parameters nearly unchanged. The lack of variations upon the temperature increase by as much as 25 K confirms that **A** and **B** are rather geometric isomers than any tautomers related by the proton exchange.

4. The  $\delta^{\text{H}(8)}$  values for **2a-2f** (*ca.* 9.2-10.3 ppm) are by *ca.* 1-2 ppm larger than for **1a-1f** (*ca.* 7.7-8.9 ppm). Similar differences of *ca.* 2 ppm can be concluded for the known analogues of

**2a-2c** containing 1,2-cyclohexanedicarboximide (*1H*-pyrrolidine-2,5-dione moiety) instead of 3,4-dimethyl-*1H*-pyrrole-2,5-dione ( $\delta^{H(8)} = 9.6\text{--}9.8$  ppm, all in DMSO- $d_6$  [EE,FF]).

**5.** A strong  $^1\text{H}$  deshielding phenomenon in **2a-2f** is most likely caused by an anisotropic effect of the *1H*-pyrrole-2,5-dione system, being the sum of two components: the one of a heteroaromatic pyrrole ring (6  $\pi$  electrons) and that of both carbonyl side groups ( $2 * 2 = 4$   $\pi$  electrons). However, the latter contribution seems to be even more efficient than the former one because in the already mentioned **2a-2c** analogues containing a saturated *1H*-pyrrolidine-2,5-dione moiety (*i.e.* having no aromatic  $\pi$  electrons) the observed  $\delta^{H(8)}$  increases, in respect to **1a-1c**, were large as well (by *ca.* 2 ppm) [EE,FF]. Nevertheless, one can assume that both effects play an important role in determining the  $\delta^{H(8)}$  values in **2a-2f**.

**6.** For each given **2x** molecule the observed difference between H(8) signals in **A** and **B** (varying from 0.05 ppm in **2e** to 0.32 ppm in **2f**) probably results from various magnitude of the total anisotropic effect at this hydrogen. It suggests that H(8) atom in **A** and **B**, for a given **2x** molecule, has a different geometric position in respect to the *1H*-pyrrole-2,5-dione system, being a source of this anisotropic effect.

**7.** **A** and **B** are most likely geometric isomers differing in the position of  $\text{R}^1$  and  $\text{N}(8)\text{H-R}^2$  substituents at the C(7) carbon. The lack of rotation around the  $\text{N}(6)=\text{C}(7)$  double bond results in *cis*-/*trans*- isomerism: in one stereomer  $\text{R}^1$  is *trans* to N(1) and  $\text{N}(8)\text{H-R}^2$  is *cis* to N(1), whereas in the other one  $\text{R}^1$  is *cis* to N(1) and  $\text{N}(8)\text{H-R}^2$  is *trans* to N(1). Taking into account the spatial orientation of N(1) and N(8) atoms, these are *Z* and *E* stereomers, as shown at the scheme below (see also Figure 3 of the main text).

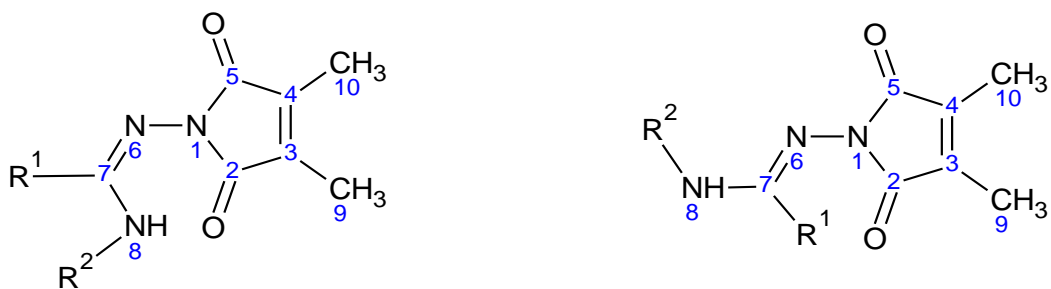

*Z* ( $\text{R}^1$  *trans* to N(1),  $\text{N}(8)\text{H-R}^2$  *cis* to N(1))      *E* ( $\text{R}^1$  *cis* to N(1),  $\text{N}(8)\text{H-R}^2$  *trans* to N(1))

**8.** Such *Z/E* isomerism was already suggested for two other amidrazones, analogous to **1a-1f** (however, substituted both at N(1) and N(3)), *i.e.* 1-(4-methylphenylsulfonyl)-3-(4-hydroxyphenyl-(2-ethyl))-acetamidrazone and 1-(4-methylphenylsulfonyl)-3-(4-hydroxyphenyl-(2-ethyl))-propionamidrazone, for which a similar doubling of  $^1\text{H}$  and  $^{13}\text{C}$  NMR signals was observed in DMSO- $d_6$  solutions [GG].



**9.** The hypothesis of *Z/E* isomerism is supported by the fact that, in the solid phase of **2a** or **2d**, where only one stereomer is observed, the crystal structures correspond just to such distinct isomeric species: **2a** to *Z* and **2d** to *E*.

**10.** The further analysis of  $^1\text{H}$  NMR spectra of **2a-2f** allows to propose attribution of *Z* and *E* geometry to the **A** and **B** species, respectively:

**a)** First of all, when to compare both geometric isomers, one can conclude that in each given **2x** molecule the anisotropic effect of the *1H*-pyrrole-2,5-dione system, appearing at the H(8) atom, should be more expressed for *Z* than *E* stereomer. The reason is the shortening of the spatial distance between H(8) and the *1H*-pyrrole-2,5-dione moiety upon the virtual *E*  $\rightarrow$  *Z* transition. It must result in a stronger deshielding of H(8), *i.e.* in a higher  $\delta^{\text{H}(8)}$  value, which indicates that *E* geometry corresponds to **B**, while the *Z* one to **A**.

**b)** Such a geometric relation between *Z* and *E* stereomers is well-exemplified by comparison of the single crystal X-ray structures of **2a** and **2d**. In solid **2a** (*Z* stereomer) the distance between H(8) and the centroid of the pyrrole ring (N(1)<<C(5)) is only 4.256 Å, whereas in solid **2d** (*E* stereomer) it is as much as 5.419 Å. Similarly, the distances between H(8) and the centre of C(2)=O or C(5)=O double bonds are 3.461 Å or 4.896 Å in solid **2a** (geometry; mean 4.179 Å) and 5.054 Å or 5.214 Å in solid **2d** (*E* geometry, mean 5.134 Å). Obviously, the distance from a  $\pi$ -electron system is not the only factor determining the magnitude of the anisotropic effect, nevertheless, its increase by as much as *ca.* 1 Å must have an observable impact.

**c)** A strong anisotropic effect of the *1H*-pyrrole-2,5-dione system is observed also for H(2'') and/or H(6'') signals of the R<sup>2</sup> substituent in the **A** forms of **2a-2f**, as exhibited by the  $\delta^{\text{H}(2')}$  and/or  $\delta^{\text{H}(6')}$  chemical shifts, increased by *ca.* 1.1-1.5 ppm (**2a-A** +1.24 ppm, **2b-A** +1.18 ppm, **2c-A** +1.23 ppm, **2d-A** +1.47 ppm, **2e-A** +1.14 ppm, **2f-A** +1.43 ppm), comparing to **1a-1f**. This phenomenon is probably caused by the fact that in *Z* stereomers (corresponding to the **A** species) there is a relatively parallel orientation of the R<sup>2</sup> ring in respect to the *1H*-pyrrole-2,5-dione system (as exhibited by solid **2a** of *Z* geometry, where the dihedral angle between the N(1)<<C(5) and C(21)<<C(26) best planes is 26.9°), while the average distances between H(22) and/or H(26) atoms and the  $\pi$ -electron systems of the *1H*-pyrrole-2,5-dione moiety are relatively short, being less than 4 Å (in solid **2a**: H(22)/H(26)...'pyrrole ring centroid' 3.525 Å/3.986 Å – mean 3.756 Å; H(22)...'middle point of C(2)=O bond' / H(22)...'middle point of C(5)=O bond' / H(26)...'middle point of C(2)=O bond' / H(26)...'middle point of C(5)=O bond' 4.298 Å/2.965 Å/3.265 Å/5.174 Å – mean 3.925 Å).

**d)** The same anisotropic effect is nearly absent for the other signals of the R<sup>2</sup> substituent in the **A** forms of **2a-2f**, most likely due to the fact that in *Z* stereomers the respective protons are much more far-distant from the *1H*-pyrrole-2,5-dione moiety; in fact, the respective average distances noticeably exceed 4 Å (in solid **2a**: H(23)/H(25)...'pyrrole ring centroid' 4.143 Å/4.604 Å – mean 4.374 Å; H(24)...'pyrrole ring centroid' 4.622 Å; H(23)...'middle point of C(2)=O bond' / H(23)...'middle point of C(5)=O bond' / H(25)...'middle point of C(2)=O bond' / H(25)...'middle point of C(5)=O bond' 5.335 Å/3.654 Å/4.610 Å/5.638 Å – mean 4.809 Å; H(24)...'middle point of C(2)=O bond' / 'middle point of C(5)=O bond' 5.449 Å/4.967 Å – mean 5.208 Å). As already mentioned, the impact of both carbonyl groups is probably even more important than that of the *1H*-pyrrole ring, thus the increase of the above mean distances between various protons in R<sup>2</sup> and the middle points of the C=O double bonds (3.925 Å for H(22)/H(26) → 4.809 Å for H(23)/H(25) → 5.208 Å for H(24)) well explains the observed dependency of their <sup>1</sup>H chemical shifts.

**e)** An analogous anisotropic effect does not appear for H(2'') and/or H(6'') signals of the R<sup>2</sup> substituent in the **B** forms of **2a-2f**, as the respective increases of δ<sup>H(2'')</sup> and/or δ<sup>H(6'')</sup> chemical shifts, comparing to **1a-1f**, are very small (by *ca.* 0.1-0.2 ppm). It is consistent with the *E* geometry of these species, upon which the R<sup>2</sup> ring is more perpendicular to the *1H*-pyrrole-2,5-dione system (as exhibited by solid **2d** being *E* stereomer, where the dihedral angle between the N(1)<<C(5) and C(21)<<C(26) best planes is 76.8°), while the distances between H(22) and/or H(26) atoms and the π-electron systems of the *1H*-pyrrole-2,5-dione moiety are much longer (in **2d**: H(26)...'pyrrole ring centroid' 4.390 Å; H(26)...'middle point of C(2)=O bond' / 'middle point of C(5)=O bond' 3.834 Å/4.551 Å – mean 4.192 Å). In our opinion, again the increase of the average distance between H(22)/H(26) or H(26) and the center of the C=O double bond(s), noted upon the *Z* (in **2a**) → *E* (in **2d**) transition (3.925 Å → 4.192 Å) is probably the most significant.

**f)** There is a question, however, why nearly no anisotropic effect is observed for the H(2') and H(6') signals of the R<sup>1</sup> substituent in the **B** forms of **2a-2f**, *i.e.* in *E* stereomers – although the R<sup>1</sup> substituents are similarly positioned *vis-à-vis* this complex π-electron system like the R<sup>2</sup> ones in *Z* isomers? Seemingly, one could expect an analogous deshielding of H(12) and H(16) protons in the **B** species like for H(22) and H(26) in the **A** forms, but such a phenomenon does not occur at all; in reality, the respective changes of δ<sup>H(2')</sup> and/or δ<sup>H(6')</sup> chemical shifts, comparing to **1a-1f**, are of variable sign and moderate or small absolute magnitude (max. to *ca.* ±0.4 ppm, sometimes even *ca.* 0.0 ppm – like H(6') in **2d-B**). Most likely, the lack of such an effect is caused by the fact that the R<sup>1</sup> ring is nearly perpendicular to the *1H*-pyrrole-2,5-dione

system (in solid **2d** the dihedral angle between the N(1)<<C(5) and C(11)<<C(16) best planes is 78.1°) and more far-distant (through space) than the R<sup>2</sup> one in *Z* stereomers. The latter circumstance is well-exemplified by observation that in solid **2d** the ‘centroid of the pyrrole ring’...‘centroid of the C(2a)-bonded 2-pyridyl ring’ distance is 4.320 Å, *i.e.* as much as *ca.* 1.0 Å more than the ‘centroid of the pyrrole ring’...‘centroid of the N(3)-bonded phenyl ring’ one in solid **2a**, being 3.340 Å. Moreover, in solid **2d** the mean distance H(16)...‘middle point of C(2)=O bond’ / ‘middle point of C(5)=O bond’ (5.217 Å/2.818 Å) is 4.018 Å, *i.e.* *ca.* 0.1 Å more than that of H(22)...‘middle point of C(2)=O bond’ / H(22)...‘middle point of C(5)=O bond’ / H(26)...‘middle point of C(2)=O bond’ / H(26)...‘middle point of C(5)=O bond’, already determined as 3.925 Å. All these factors reduce the anisotropic effect of the *1H*-pyrrole-2,5-dione system, resulting in only slight  $\delta^{H(2')}$  and/or  $\delta^{H(6')}$  variations in the **B** forms being *E* stereomers.

**g)** Attribution of *Z* geometry to the **A** species, and that of *E* to the **B** one, corresponds well to the fact that in the DMSO-*d*<sub>6</sub> solutions of **2a** and **2d**, the respective major forms (**2a**: 61% **A**, **2d**: 79% **B**) are identical to those exclusively appearing in the solid phase (**2a**: *Z*, **2d**: *E*).

**11.** In solid **2d** the intramolecular C(26)–H(26)⋯N(6) hydrogen bond is observed due to the *E* geometry. However, it must be relatively weak, as its influence at the H(6'') signal in **2d-B** is rather small ( $\delta^{H(6'')} = 6.80$  ppm, while 6.70 ppm for **1d**), especially when to compare with a much larger impact of the *1H*-pyrrole-2,5-dione anisotropic effect in **2d-A** ( $\delta^{H(6'')} = 8.17$  ppm).

**12.** In the <sup>13</sup>C NMR spectra the most expressed result of each **1x** → **2x** transition is observed for the aliphatic C(7) atom of **2a-2f** (denoted as C(2a) in **1a-1f**), which is deshielded by *ca.* 20–30 ppm ( $\delta^{C(2a)} = ca. 135\text{--}139$  ppm →  $\delta^{C(7)} = ca. 158\text{--}169$  ppm). This phenomenon again reveals importance of the anisotropic effect of the *1H*-pyrrole-2,5-dione moiety. Then, for each given **2x** molecule the C(7) deshielding is slightly stronger for **A** than **B** species (by *ca.* 4–7 ppm), again confirming that **A** has *Z* geometry and **B** has *E* geometry – as in *Z* stereomers the distances between C(7) and the  $\pi$ -electron systems of the *1H*-pyrrole-2,5-dione system are shorter than in the *E* ones. Such geometric relations are exemplified in the solid phase by comparison of the respective distances in **2a** (*Z* isomer) and **2d** (*E* isomer): C(7)...‘pyrrole ring centroid’ – 3.387 Å in **2a** vs 3.456 Å in **2d**; C(7)... ‘middle point of C(2)=O bond’ / ‘middle point of C(5)=O bond’ – 2.976 Å / 3.607 Å (mean 3.292 Å) in **2a** vs 3.285 Å / 3.408 Å (mean 3.347 Å in **2d**).

**13.** The changes of  $\delta^{C(1')\text{--}C(6')}$  and  $\delta^{C(1'')\text{--}C(6'')}$  parameters upon the **1x** → **2x** transitions are variable; these chemical shifts in **2a-2f** are typical for the respective aromatic rings in R<sup>1</sup> and R<sup>2</sup> substituents. The  $\delta^{C(2,5)} = 168.2\text{--}169.4$  ppm,  $\delta^{C(3,4)} = 135.6\text{--}136.7$  ppm and  $\delta^{C(9,10)} = 8.6\text{--}9.0$  ppm values correspond well to those reported for analogous carbons in variously substituted

N(1)-amino, N(1)-amido and N(1)-imino derivatives of *1H*-pyrrole-2,5-diones, *i.e.* CO 154-174 ppm, C-CH<sub>3</sub> 135-150 ppm and CH<sub>3</sub> 8-17 ppm, which are presented in Table S10:

Table S10. <sup>13</sup>C NMR chemical shifts for selected N(1)-amino, N(1)-amido and N(1)-imino derivatives of *1H*-pyrrole-2,5-diones

| Class of chemicals:<br><b>1H-pyrrole-2,5-diones (L)</b>                       | Compound                                                                                | Solvent                                          | <sup>13</sup> C NMR chemical shift for the<br>1H-pyrrole-2,5-dione ring                      |                                              |                                        |
|-------------------------------------------------------------------------------|-----------------------------------------------------------------------------------------|--------------------------------------------------|----------------------------------------------------------------------------------------------|----------------------------------------------|----------------------------------------|
|                                                                               |                                                                                         |                                                  | C(2,5) <sup>CO</sup>                                                                         | C(3,4) <sup>C a</sup>                        | CH <sub>3</sub>                        |
| <i>N(1)-amino derivative of 1H-pyrrole-2,5-dione (L<sup>1</sup>)</i>          | 1,1-dimethylamino-L <sup>1</sup>                                                        | CDCl <sub>3</sub> [G]                            | 174.1                                                                                        | absent                                       | absent                                 |
|                                                                               | 1-phenylamino-L <sup>1</sup>                                                            | CDCl <sub>3</sub> [G]<br>DMSO-d <sub>6</sub> [H] | 172.3<br>167.0                                                                               | absent                                       | absent                                 |
|                                                                               | 1-(4-methylphenyl)amino-L <sup>1</sup>                                                  | CDCl <sub>3</sub> [G]                            | 172.4                                                                                        | absent                                       | absent                                 |
|                                                                               | 1-(4-methoxyphenyl)amino-L <sup>1</sup>                                                 | CDCl <sub>3</sub> [G]                            | 171.3                                                                                        | absent                                       | absent                                 |
|                                                                               | 1-(4-bromophenylamino)-L <sup>1</sup>                                                   | DMSO-d <sub>6</sub> [I]                          | 169.1                                                                                        | absent                                       | absent                                 |
|                                                                               | 1-(piperidin-1-yl)-L <sup>1</sup>                                                       | CDCl <sub>3</sub> [G]                            | 170.3                                                                                        | absent                                       | absent                                 |
|                                                                               | 1-(morpholin-4-yl)-L <sup>1</sup>                                                       | CDCl <sub>3</sub> [G]                            | 171.2                                                                                        | absent                                       | absent                                 |
|                                                                               | 1-(4-methylpiperazin-1-yl)-L <sup>1</sup>                                               | CDCl <sub>3</sub> [G]                            | 171.2                                                                                        | absent                                       | absent                                 |
|                                                                               | 1,1-diphenylamino-L <sup>1</sup>                                                        | CDCl <sub>3</sub> [G]                            | 171.2                                                                                        | absent                                       | absent                                 |
| <i>N(1)-imino derivative of 1H-pyrrole-2,5-dione (L<sup>1</sup>)</i>          | 1-( <i>E</i> -4-phenylbut-3-en-2-ylideneimino)-L <sup>1</sup>                           | CDCl <sub>3</sub> [J]                            | 154.1 <sup>b,c</sup><br>154.0 <sup>b,c</sup>                                                 | absent                                       | absent                                 |
|                                                                               | 1-( <i>E</i> -4-(2-fluorophenyl)but-3-en-2-ylideneimino)-L <sup>1</sup>                 | CDCl <sub>3</sub> [J]                            | both<br>154.0 <sup>c</sup>                                                                   | absent                                       | absent                                 |
|                                                                               | 1-( <i>E</i> -4-(3,5-bis(trifluoromethyl)phenyl)but-3-en-2-ylideneimino)-L <sup>1</sup> | CDCl <sub>3</sub> [J]                            | 154.3 <sup>b,c</sup><br>154.0 <sup>b,c</sup>                                                 | absent                                       | absent                                 |
|                                                                               | 1-( <i>E</i> -4-(2,4-dichlorophenyl)but-3-en-2-ylideneimino)-L <sup>1</sup>             | CDCl <sub>3</sub> [J]                            | both<br>153.9 <sup>c</sup>                                                                   | absent                                       | absent                                 |
|                                                                               | 1-( <i>E</i> -4-(4-nitrophenyl)but-3-en-2-ylideneimino)-L <sup>1</sup>                  | CDCl <sub>3</sub> [J]                            | 154.1 <sup>b,c</sup><br>153.9 <sup>b,c</sup>                                                 | absent                                       | absent                                 |
|                                                                               |                                                                                         |                                                  |                                                                                              |                                              |                                        |
| <i>N(1)-amino derivative of 3-methyl-1H-pyrrole-2,5-dione (L<sup>2</sup>)</i> | 1-phenylamino-L <sup>2</sup>                                                            | CDCl <sub>3</sub> [Q]                            | 165.4 <sup>b</sup><br>168.7 <sup>b</sup>                                                     | unknown                                      | 11.2                                   |
|                                                                               | L <sup>2</sup> -L <sup>2d</sup>                                                         | CDCl <sub>3</sub> [Q]                            | 163.9 <sup>b</sup><br>166.3 <sup>b</sup>                                                     | 150.2 <sup>e</sup>                           | unknown                                |
| <i>N(1)-imino derivative of 3-methyl-1H-pyrrole-2,5-dione (L<sup>2</sup>)</i> | 1-( <i>E</i> -4-phenylbut-3-en-2-ylideneimino)-L <sup>2</sup>                           | CDCl <sub>3</sub> [J]                            | 155.1 <sup>b</sup><br>154.4 <sup>b</sup>                                                     | 146.0 <sup>e,f</sup><br>144.4 <sup>e,f</sup> | 16.9 <sup>f</sup><br>16.4 <sup>f</sup> |
|                                                                               | 1-( <i>E</i> -4-(3,5-bis(trifluoromethyl)phenyl)but-3-en-2-ylideneimino)-L <sup>2</sup> | CDCl <sub>3</sub> [J]                            | 155.4 <sup>b,f</sup><br>155.0 <sup>b,f</sup><br>154.7 <sup>b,f</sup><br>154.3 <sup>b,f</sup> | 146.9 <sup>e,f</sup><br>144.3 <sup>e,f</sup> | 17.0 <sup>f</sup><br>16.4 <sup>f</sup> |

|                                                                                               |                                                                             |                        |                                          |                                              |                                        |
|-----------------------------------------------------------------------------------------------|-----------------------------------------------------------------------------|------------------------|------------------------------------------|----------------------------------------------|----------------------------------------|
|                                                                                               | 1-( <i>E</i> -4-(2,4-dichlorophenyl)but-3-en-2-ylideneimino)-L <sup>2</sup> | CDCl <sub>3</sub> [J]  | 155.0 <sup>b</sup><br>154.3 <sup>b</sup> | 146.6 <sup>e,f</sup><br>144.1 <sup>e,f</sup> | 17.0 <sup>f</sup><br>16.4 <sup>f</sup> |
| <i>N</i> (1)-amino derivative of 3,4-dimethyl-1 <i>H</i> -pyrrole-2,5-dione (L <sup>3</sup> ) | 1-phenylamino-L <sup>3</sup>                                                | CDCl <sub>3</sub> [Q]  | 165.5                                    | unknown                                      | 10.0                                   |
|                                                                                               | L <sup>3</sup> -L <sup>3g</sup>                                             | CDCl <sub>3</sub> [Q]  | 166.3                                    | 138.9                                        | unknown                                |
|                                                                                               | 1,1-dimethylamino-L <sup>3</sup>                                            | CDCl <sub>3</sub> [T]  | 170.4                                    | 135.7                                        | 8.6                                    |
| <i>N</i> (1)-amido derivative of 3,4-diphenyl-1 <i>H</i> -pyrrole-2,5-dione (L <sup>5</sup> ) | 1-benzamido-L <sup>5</sup>                                                  | CDCl <sub>3</sub> [BB] | 168.1 or 165.9 <sup>h</sup>              | unknown                                      | absent                                 |
|                                                                                               | 1-(4-methoxybenzamido)-L <sup>5</sup>                                       | CDCl <sub>3</sub> [BB] | 168.2 or 165.4 <sup>h</sup>              | unknown                                      | absent                                 |
|                                                                                               | 1-(4-bromobenzamido)-L <sup>5</sup>                                         | CDCl <sub>3</sub> [BB] | 168.3 or 165.2 <sup>h</sup>              | unknown                                      | absent                                 |
|                                                                                               | 1-(4-nitrobenzamido)-L <sup>5</sup>                                         | CDCl <sub>3</sub> [BB] | 168.0 or 164.2 <sup>h</sup>              | unknown                                      | absent                                 |

<sup>a</sup> only methyl-substituted C(3) or C(4) atoms are taken into account

<sup>b</sup> exact assignment to C(2) and C(5) remains unknown

<sup>c</sup> >C(2)=O and >C(5)=O moieties are inequivalent, due to the N(1) substitution by the unsymmetrical –N=CR<sup>1</sup>R<sup>2</sup> moiety

<sup>d</sup> systematic name of this dimeric species is 3,3'-dimethyl-1,1'-bipyrrole-2,2',5,5'-tetraone

<sup>e</sup> assigned to C(3)–CH<sub>3</sub>

<sup>f</sup> optional doubling of some C(2)=O / C(5)=O, C(3)–CH<sub>3</sub> and CH<sub>3</sub> signals probably reflects the presence of two geometric isomers differing in orientation of the unsymmetrical –N=CR<sup>1</sup>R<sup>2</sup> moiety in respect to the 3-substituted pyrrole ring

<sup>g</sup> systematic name of this dimeric species is 3,3',4,4'-tetramethyl-1,1'-bipyrrole-2,2',5,5'-tetraone

<sup>h</sup> it is unclear whether this is >C(2,5)=O or –NH–CO– carbon

## PART F. X-RAY STRUCTURES OF 2a AND 2d

Table S11. Selected bond lengths (Å), bond angles (°) and torsion angles (°) in the molecules **2a** and **2d**, and the closely related, CSD-reported X-ray structure LUZGUJ [FF]

| <i>bond / angle</i>   | <b>2a</b> | <b>2d</b> | LUZGUJ <sup>a</sup> |
|-----------------------|-----------|-----------|---------------------|
| <i>geometry</i>       | <i>Z</i>  | <i>E</i>  | <i>E</i>            |
| N(1)–N(6)             | 1.409(1)  | 1.419(2)  | 1.406(4)            |
| N(6)–C(7)             | 1.307(2)  | 1.301(2)  | 1.306(4)            |
| C(7)–N(8)             | 1.363(2)  | 1.361(2)  | 1.353(4)            |
| N(1)–C(2)             | 1.397(2)  | 1.401(2)  | 1.401(5)            |
| C(2)–C(3)             | 1.503(2)  | 1.497(2)  | 1.508(5)            |
| C(3)–C(4)             | 1.334(2)  | 1.340(2)  | 1.523(5)            |
| C(4)–C(5)             | 1.498(2)  | 1.501(2)  | 1.490(5)            |
| C(5)–N(1)             | 1.379(2)  | 1.401(2)  | 1.369(5)            |
| C(2)–O(1)             | 1.209(2)  | 1.208(2)  | 1.192(4)            |
| C(5)–O(2)             | 1.213(2)  | 1.212(2)  | 1.204(4)            |
| C(7)–C(11)            | 1.488(2)  | 1.508(2)  | 1.482(5)            |
| N(8)–C(21)            | 1.422(2)  | 1.410(2)  | 1.404(4)            |
| C(2)–N(1)–N(6)        | 125.0(1)  | 119.8(1)  | 121.7(3)            |
| C(5)–N(1)–N(6)        | 123.9(1)  | 124.1(1)  | 122.7(3)            |
| C(5)–N(1)–C(2)        | 110.3(1)  | 109.5(1)  | 113.8(3)            |
| N(1)–N(6)–C(7)        | 113.5(1)  | 112.6(1)  | 111.9(3)            |
| N(6)–C(7)–N(8)        | 128.8(1)  | 120.8(1)  | 120.4(3)            |
| N(6)–C(7)–C(11)       | 114.9(1)  | 124.3(1)  | 125.7(3)            |
| C(11)–C(7)–N(8)       | 116.3(1)  | 114.9(1)  | 113.8(3)            |
| C(7)–N(8)–C(21)       | 125.7(1)  | 128.4(1)  | 130.4(4)            |
| N(1)–C(2)–C(3)–C(4)   | 2.3(1)    | 4.1(2)    | 16.6(4)             |
| C(2)–C(3)–C(4)–C(5)   | 1.3(1)    | 0.8(2)    | –16.2(4)            |
| C(3)–C(4)–C(5)–N(1)   | –4.5(1)   | –5.5(2)   | 10.3(4)             |
| C(4)–C(5)–N(1)–C(2)   | 6.0(1)    | 8.1(2)    | 0.4(4)              |
| C(5)–N(1)–C(2)–C(3)   | –5.2(1)   | –7.7(2)   | –11.1(5)            |
| O(1)–C(2)–N(1)–N(6)   | 4.0(2)    | 21.4(2)   | 6.5(6)              |
| O(2)–C(5)–N(1)–N(6)   | –3.6(2)   | –22.3(2)  | –12.6(5)            |
| C(2)–N(1)–N(6)–C(7)   | –63.4(2)  | –103.4(2) | –76.2(4)            |
| N(1)–N(6)–C(7)–C(11)  | 166.3(1)  | –11.0(2)  | –8.4(5)             |
| N(1)–N(6)–C(7)–N(8)   | –13.0(2)  | 171.5(1)  | 173.1(3)            |
| N(6)–C(7)–C(11)–C(16) | –29.6(2)  | –73.3(2)  | –66.5(5)            |
| N(6)–C(7)–N(8)–C(21)  | –22.3(2)  | –7.5(2)   | –6.7(6)             |
| C(7)–N(8)–C(21)–C(26) | 133.7(1)  | –4.0(2)   | –3.5(7)             |

<sup>a</sup> in this compound the N(1)<<C(5) ring is not aromatic but saturated (1*H*-pyrrolidine-2,5-dione moiety being a part of the 1,2-cyclohexanedicarboximide system)



Table S12. Selected bond lengths in the aliphatic chain of **2a**, **2d** and of the X-ray reported *N*<sup>1</sup>-acylamidrazones

| Compound                                                          | CSD reference code | Geometry, N(1)-N(6)-C(7)-N(8) or N(1)-N(2)-C(2a)-N(3) torsion angle [°] | N(1)-N(6) or N(1)-N(2) bond length [Å] | N(6)-C(7) or N(2)-C(2a) bond length [Å] | C(7)-N(8) or C(2a)-N(3) bond length [Å] | N(1)-N(6)-C(7) or N(1)-N(2)-C(2a) bond angle [°] | N(6)-C(7)-N(8) or N(2)-C(2a)-N(3) bond angle [°] |
|-------------------------------------------------------------------|--------------------|-------------------------------------------------------------------------|----------------------------------------|-----------------------------------------|-----------------------------------------|--------------------------------------------------|--------------------------------------------------|
| <b>2a</b>                                                         | <b>This work</b>   | Z, -13.0(2)                                                             | 1.409(1)                               | 1.307(2)                                | 1.363(2)                                | 113.5(1)                                         | 128.8(1)                                         |
| <b>2d</b>                                                         | <b>This work</b>   | E, 171.5(1)                                                             | 1.419(2)                               | 1.301(2)                                | 1.361(2)                                | 112.6(1)                                         | 120.8(1)                                         |
| <b>1d</b> <sup>N(1)</sup> -acyl <sup>a</sup>                      | PAZDIF [HH]*       | Z, 0.4(4)                                                               | 1.386(2)                               | 1.290(3)                                | 1.383(3)                                | 119.2(2)                                         | 136.9(2)                                         |
| <b>1d</b> <sup>N(1)</sup> -acyl <sup>b</sup>                      | RIBVEG [II]*       | Z, -0.4(5)                                                              | 1.371(3)                               | 1.301(5)                                | 1.356(5)                                | 118.7(3)                                         | 134.1(3)                                         |
| <b>1d</b> <sup>N(1)</sup> -acyl <sup>c1</sup>                     | RICGUI [II]*       | Z, 2.5(4)                                                               | 1.388(3)                               | 1.284(3)                                | 1.391(3)                                | 118.8(2)                                         | 132.7(2)                                         |
| <b>1d</b> <sup>N(1)</sup> -acyl <sup>c2</sup>                     | RICHAP [II]*       | Z, 2.9(5)/1.9(6)                                                        | 1.386(3)/<br>1.387(5)                  | 1.288(4)/<br>1.295(4)                   | 1.388(4)/<br>1.384(4)                   | 119.3(2)<br>120.3(3)                             | 132.4(3)<br>136.2(3)                             |
| <b>1d</b> <sup>N(1)</sup> -acyl <b>1d</b> <sup>d</sup>            | RICHET [II]*       | Z, 0.8(3)                                                               | 1.383(2)                               | 1.289(2)                                | 1.381(2)                                | 120.1(1)                                         | 134.4(1)                                         |
| <b>1d</b> <sup>N(1)</sup> -acyl <b>1d</b> <sup>e</sup>            | RICHIX [II]*       | Z, -0.2(3)                                                              | 1.384(2)                               | 1.293(2)                                | 1.381(2)                                | 118.1(1)                                         | 131.7(2)                                         |
| <b>1d</b> <sup>N(1)</sup> -acyl <b>1d</b> <sup>f</sup>            | RICHOD [II]*       | Z,<br>3.2(4)/-1.6(4)                                                    | 1.374(3)/<br>1.374(3)                  | 1.291(4)/<br>1.284(3)                   | 1.398(4)/<br>1.411(4)                   | 117.9(2)<br>118.6(2)                             | 126.3(3)<br>125.1(2)                             |
| <b>1d</b> <sup>N(1)</sup> -acyl · CH <sub>3</sub> OH <sup>g</sup> | RICHUJ [II]*       | Z, 0.5(3)                                                               | 1.379(2)                               | 1.298(3)                                | 1.381(3)                                | 118.5(2)                                         | 134.5(2)                                         |

<sup>a</sup> acyl = 6-carboxycyclohex-3-enylcarbonyl

<sup>b</sup> acyl = 2-carboxybenzoyl

<sup>c1, c2</sup> acyl = 2-carboxycyclohexylcarbonyl

<sup>d</sup> acyl = 3-carboxypyrid-2-ylcarbonyl

<sup>e</sup> acyl = 3-carboxypyrid-4-ylcarbonyl

<sup>f</sup> acyl = 3-carboxypropionyl

<sup>g</sup> acyl = 4-carboxybutyryl

\* In these molecules the numbering of the aliphatic chain is different from **2a** and **2d**, i.e. N(1), N(2), C(2a), N(3) instead of N(1), N(6), C(7), N(8).

Table S13. Selected bond lengths and angles in the 1*H*-pyrrole-2,5-dione moiety of **2a**, **2d** and some other X-ray reported 1*H*-pyrrole-2,5-dione derivatives

| Class of chemicals:<br><b>1<i>H</i>-pyrrole-2,5-diones (L)</b>                              | Compound                                                                    | CSD reference<br>code       | Mean<br>N(1)-<br>C(2)/C(5)<br>bond length<br>[Å] | Mean<br>C(2)-O(1) /<br>C(5)-O(2)<br>bond length<br>[Å] | Mean<br>C(2)-N(1)-<br>C(5) bond<br>angle [°] |
|---------------------------------------------------------------------------------------------|-----------------------------------------------------------------------------|-----------------------------|--------------------------------------------------|--------------------------------------------------------|----------------------------------------------|
| <i>1H</i> -pyrrole-2,5-dione ( <i>L</i> <sup>1</sup> )<br>derivatives                       | <i>L</i> <sup>1</sup>                                                       | TEKQAB [C]                  | 1.387(8)                                         | 1.215(9)                                               | 110.0(5)                                     |
|                                                                                             | 1-(4-bromophenylamino)- <i>L</i> <sup>1</sup>                               | CARHAF [I]                  | 1.390(5)                                         | 1.198(5)                                               | 111.0(3)                                     |
| <i>3</i> -methyl-1 <i>H</i> -pyrrole-2,5-dione ( <i>L</i> <sup>2</sup> )<br>derivatives     | 1-phenylamino- <i>L</i> <sup>2</sup>                                        | COXYEV [Q]                  | 1.386(2)                                         | 1.198(2)                                               | 110.7(1)                                     |
|                                                                                             | <i>L</i> <sup>2</sup> - <i>L</i> <sup>2c</sup>                              | TUBBID [Q]                  | 1.395(4)                                         | 1.200(4)                                               | 111.6(2)                                     |
| <i>3,4</i> -dimethyl-1 <i>H</i> -pyrrole-2,5-dione ( <i>L</i> <sup>3</sup> )<br>derivatives | 1-phenylamino- <i>L</i> <sup>3</sup>                                        | COXYUL [Q]                  | 1.386(2)                                         | 1.210(2)                                               | 110.3(1)                                     |
|                                                                                             | <i>L</i> <sup>3</sup> - <i>L</i> <sup>3e</sup>                              | COXYAR [Q]<br>COXYAR 01 [Q] | 1.404(5)<br>1.397(7)                             | 1.201(6)<br>1.195(7)                                   | 111.2(6)                                     |
|                                                                                             | <b>2a</b>                                                                   | <b>This work</b>            | <b>1.388(2)</b>                                  | <b>1.211(2)</b>                                        | <b>110.3(1)</b>                              |
|                                                                                             | <b>2d</b>                                                                   | <b>This work</b>            | <b>1.401(2)</b>                                  | <b>1.210(2)</b>                                        | <b>109.5(1)</b>                              |
| <i>3,4</i> -diphenyl-1 <i>H</i> -pyrrole-2,5-dione ( <i>L</i> <sup>5</sup> )<br>derivatives | <i>L</i> <sup>5</sup> · 1-methylpyrrolidin-2-one                            | NIXRUJ [W]                  | 1.382(2)                                         | 1.212(2)                                               | 110.4(1)                                     |
|                                                                                             | 1-(4-bromobenzamido)- <i>L</i> <sup>5</sup>                                 | KUQRIZ [BB]                 | 1.394(4)                                         | 1.194(4)                                               | 111.9(2)                                     |
|                                                                                             | 1-methoxycarbonylamino-3,4-bis(4-nitrophenyl)-1 <i>H</i> -pyrrole-2,5-dione | TAJSIG [CC]                 | 1.388(4)                                         | 1.198(4)                                               | 111.8(2)                                     |

Table S14. Geometries of hydrogen bonds and selected short contacts in the crystals of **2a** and **2d**

| Interaction                                     | $d_{D-H} / \text{\AA}$ | $d_{H \cdots A} / \text{\AA}$ | $d_{D \cdots A} / \text{\AA}$ | $\angle d_{D-H \cdots A} / ^\circ$ | Symmetry code       |
|-------------------------------------------------|------------------------|-------------------------------|-------------------------------|------------------------------------|---------------------|
| <b>2a</b>                                       |                        |                               |                               |                                    |                     |
| N(8)–H(8)···O(2)                                | 0.85(2)                | 2.07(2)                       | 2.901(2)                      | 167(1)                             | -x+1, y-1/2, -z+1/2 |
| C(26)–H(26)···N(6)                              | 0.93                   | 2.70                          | 3.606(2)                      | 165                                |                     |
| C(9)–H(9a)···C(13)                              | 0.96                   | 2.78                          | 3.492(2)                      | 132                                |                     |
| C(22)–H(22)···O(1)                              | 0.93                   | 2.68                          | 3.514(2)                      | 149                                | -x+1, y+1/2, -z+1/2 |
| C(10)–H(10b)···N(6)                             | 0.96                   | 2.62                          | 3.581(2)                      | 175                                | -x+1, -y+1, -z      |
| C(9)–H(9b)···O(1)                               | 0.96                   | 2.60                          | 3.527(2)                      | 163                                | -x+1, -y, -z        |
| <b>2d</b>                                       |                        |                               |                               |                                    |                     |
| N(8)–H(8)···N(22)                               | 0.90(2)                | 2.24(2)                       | 3.137(2)                      | 177(1)                             | -x+1, -y, -z        |
| C(23)–H(23)··· $\pi_{C(11)-C(16) \text{ cent}}$ | 0.93                   | 2.39                          | 3.311(2)                      | 169                                |                     |
| C(14)–H(14)···O(1)                              | 0.93                   | 2.72                          | 3.284(2)                      | 120                                | x, y, z+1           |
| C(15)–H(15)···O(1)                              | 0.93                   | 2.66                          | 3.259(2)                      | 122                                |                     |
| C(13)–H(13)···O(1)                              | 0.93                   | 2.69                          | 3.499(2)                      | 146                                | x, -y-1/2, z+1/2    |
| C(14)–H(14)···N(12)                             | 0.93                   | 2.75                          | 3.444(2)                      | 133                                |                     |
| C(15)–H(15)···O(2)                              | 0.93                   | 2.54                          | 3.287(2)                      | 138                                | x, -y+1/2, z+1/2    |
| C(10)–H(10b)···C(3)                             | 0.96                   | 2.87                          | 3.785(2)                      | 159                                |                     |
| C(10)–H(10a)···O(1)                             | 0.96                   | 2.55                          | 3.450(2)                      | 156                                | -x, y+1/2, -z-1/2   |
| C(9)–H(9a)···C(15)                              | 0.96                   | 2.80                          | 3.374(2)                      | 119                                | -x, -y, -z          |
| C(25)–H(25)···C(21)                             | 0.96                   | 2.75                          | 3.458(2)                      | 134                                | x, -y+1/2, z-1/2    |
| C(26)–H(26)···N(6)                              | 0.96                   | 2.23                          | 2.829(2)                      | 121                                | x, y, z             |

## PART G. TOXICITY OF 2a-2f IN PBMC CULTURE

Figure S49. The effect of ibuprofen (IBU) and **2a-2f** at 100  $\mu\text{g/mL}$  dose on the cell viability in PBMCs culture. Dot plots representative of one experiment of apoptosis measurement by Annexin-V-APC/PI staining PBMC.

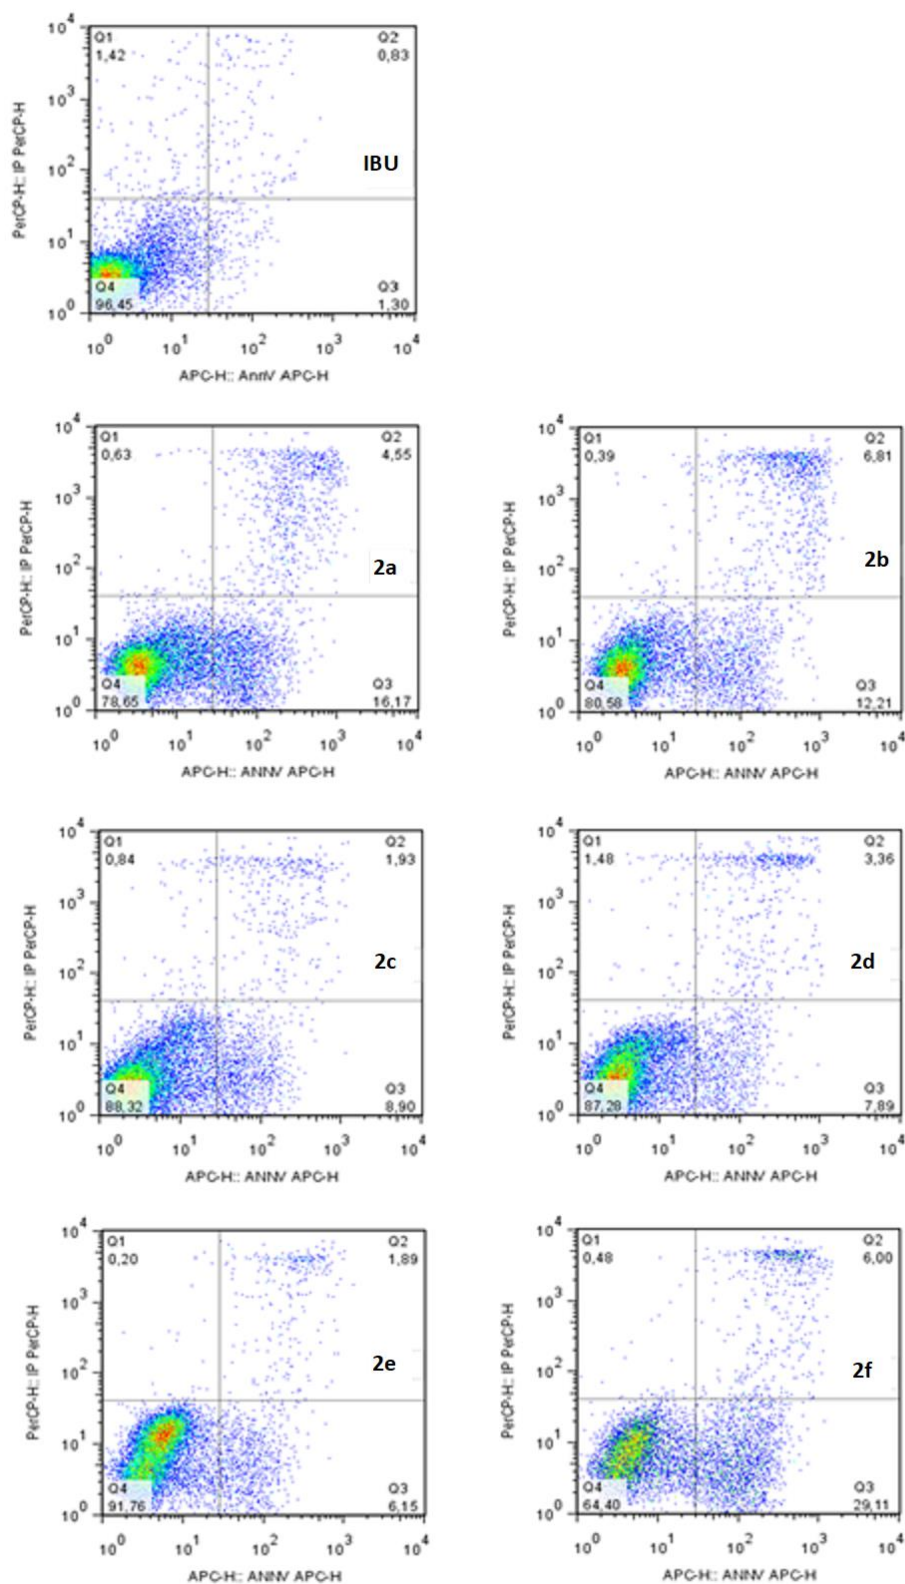

## PART H. ANTIBACTERIAL ACTIVITY OF 2a-2f

Table S15. MIC values of **2a-2f**, ampicillin and tetracycline against the tested bacterial strains

|                                                  | MIC [ $\mu\text{g/ml}$ ] |      |      |     |      |      |            |              |
|--------------------------------------------------|--------------------------|------|------|-----|------|------|------------|--------------|
|                                                  | 2a                       | 2b   | 2c   | 2d  | 2e   | 2f   | ampicillin | tetracycline |
| <i>E. coli</i><br>ATCC 25922                     | >512                     | >512 | >512 | 256 | >512 | 512  | 8          | 2            |
| <i>Y. enterocolitica</i><br>O3                   | 512                      | 512  | 256  | 128 | >512 | >512 | 16         | 4            |
| <i>P. aeruginosa</i><br>ATCC 27853               | 512                      | >512 | 512  | 512 | >512 | >512 | >256       | 16           |
| <i>S. aureus</i><br>ATCC 25923                   | 128                      | 256  | 128  | 256 | 512  | >512 | 0.5        | 1            |
| <i>M. luteus</i>                                 | >512                     | 512  | 512  | 512 | >512 | >512 | 0.5        | 1            |
| <i>E. faecalis</i><br>ATCC 29212                 | >512                     | >512 | >512 | 512 | >512 | 512  | 1          | 16           |
| <i>M. smegmatis</i>                              | >512                     | 512  | 256  | 512 | >512 | >512 | 16         | 2            |
| <i>N. corralina</i><br>( <i>Rhodococcus</i> sp.) | >512                     | 512  | 512  | 512 | >512 | 512  | 8          | 16           |

<sup>A</sup> SDBS – Spectral Database for Organic Compounds, National Institute of Advanced Industrial Science and Technology, Japan; <http://sdb.sdb.aist.go.jp> (record 3678 – maleimide), accessed 2021/01/25.

<sup>B</sup> Spectra Base – Free Spectral Database, Bio-Rad Laboratories, Hercules, California (USA), <https://spectrabase.com/> (records for maleimide, 3,4-dimethylpyrrol), accessed 2021/01/25.

<sup>C</sup> Cox P.J., Parker S.F. Maleimide. *Acta Crystallogr. C* **1996**, 52, 2578-2580. <https://doi.org/10.1107/S0108270196006841>.

<sup>D</sup> Padie C., Zeitler K. A novel reaction-based, chromogenic and “turn-on” fluorescent chemodosimeter for fluoride detection†. *New J. Chem.* **2011**, 35, 994-997. <https://doi.org/10.1039/C0NJ00937G>.

<sup>E</sup> Ali M.A., Siddiki S.M.A.H., Kon K., Hasegawa J., Shimizu K. Versatile and Sustainable Synthesis of Cyclic Imides from Dicarboxylic Acids and Amines by Nb<sub>2</sub>O<sub>5</sub> as a Base-Tolerant Heterogeneous Lewis Acid Catalyst. *Chem. Eur. J.* **2014**, 20, 14256-14260. <https://doi.org/10.1002/chem.201404538>.

<sup>F</sup> Vera-Hidalgo M., Giovanelli E., Navio C., Perez E.M. Mild Covalent Functionalization of Transition Metal Dichalcogenides with Maleimides: A “Click” Reaction for 2H-MoS<sub>2</sub> and WS<sub>2</sub> *J. Am. Chem. Soc.* **2019**, 141, 3767-3771. <https://doi.org/10.1021/jacs.8b10930>.

<sup>G</sup> Sadiq A., Mahnashi M.H., Alyami B.A., Alqahtani Y.S., Alqarni A., Rashid U. Tailoring the substitution pattern of Pyrrolidine-2,5-dione for discovery of new structural template for dual COX/LOX inhibition. *Bioorg. Chem.* **2021**, 112, 104969. <https://doi.org/10.1016/j.bioorg.2021.104969>.

<sup>H</sup> Cheng S., Comer D.D. An alumina-catalyzed Michael addition of mercaptans to N-anilinomaleimides and its application to the solution-phase parallel synthesis of libraries. *Tetrahedron Lett.* **2002**, 43, 1179-1181. [https://doi.org/10.1016/S0040-4039\(01\)02401-7](https://doi.org/10.1016/S0040-4039(01)02401-7).

<sup>I</sup> Conley N.R., Hung R.J., Willson C.G. A New Synthetic Route to Authentic N-Substituted Aminomaleimides. *J. Org. Chem.* **2005**, 70, 4553-4555. <https://doi.org/10.1021/jo048031q>.

<sup>J</sup> Song X., Liu C., Chen P., Zhang H., Sun R. Natural Product-Based Pesticide Discovery: Design, Synthesis and Bioactivity Studies of N-Amino-Maleimide Derivatives. *Molecules* **2018**, 23, 1521. <https://doi.org/10.3390/molecules23071521>.

- <sup>K</sup> Gill G.B., James G.D., Oates K.V., Pattenden G. The synthesis of 5-ylidenepyrrol-2(5H)-ones from maleimides and from pyrrol-2(5H)-ones. *J. Chem. Soc. Perkin Trans. 1* **1993**, 2567-2579. <https://doi.org/10.1039/P19930002567>.
- <sup>L</sup> Kuehne P., Hesse M. Simple synthesis of (±)-(E)-3-(4-hydroxyphenyl)-N-[4-(3-methyl-2,5-dioxo-1-pyrrolidinyl)butyl]-2-propenamide, a novel phenolic amide derivative from the bulbs of *Lilium regale* WILSON. *Tetrahedron*, **1993**, 49, 4575-4580. [https://doi.org/10.1016/S0040-4020\(01\)81286-2](https://doi.org/10.1016/S0040-4020(01)81286-2).
- <sup>M</sup> Haddon W.F., Binder R.G., Wong R.Y., Harden L.A., Wilson R.E., Benson M., Stevens K.L. Potent Bacterial Mutagens Produced by Chlorination of Simulated Poultry Chiller Water. *J. Agric. Food Chem.* **1996**, 44, 256-263. <https://doi.org/10.1021/jf950076s>.
- <sup>N</sup> Zou C., Zeng C., Liu Z., Lu M., Sun X., Ye J.  $\gamma$ '-Selective Functionalization of Cyclic Enones: Construction of a Chiral Quaternary Carbon Center by [4+2] Cycloaddition/Retro-Mannich Reaction with 3-Substituted Maleimides. *Angew. Chem. Int. Ed.* **2016**, 55, 14257-14261. <https://doi.org/10.1002/anie.201605790>.
- <sup>O</sup> Nagy S., Szigetvari A., Ilkei V., Kramos B., Beni Z., Szantay C. Jr., Hazai L. Synthesis of aminal-type *Lilium candidum* alkaloids and lilaline; determination of their relative configuration by the concerted use of NMR spectroscopy and DFT conformational analysis. *Tetrahedron* **2021**, 81, 131827. <https://doi.org/10.1016/j.tet.2020.131827>.
- <sup>P</sup> Yogo M., Hirota K., Maki Y. Synthesis of 5-iminopyrrol-2-one derivatives from 1,3-oxazines. Ring transformations via attack on the 2- or 6-position of 1,3-oxazines *J. Chem. Soc. Perkin Trans. I*, **1984**, 2097-2102. <https://doi.org/10.1039/P19840002097>.
- <sup>Q</sup> Katrusiak A., Katrusiak A. One-step ring condensation of hydrazine derivatives and cyclic anhydrides. *J. Mol. Struct.* **2015**, 1085, 28-36. <https://doi.org/10.1016/j.molstruc.2014.12.050>.
- <sup>R</sup> Watson D.J., Dowdy E.D., Li W.S., Wang J., Polniaszek R. Electronic effects in the acid-promoted deprotection of N-2,4-dimethoxybenzyl maleimides. *Tetrahedron Lett.* **2001**, 42, 1827-1830. [https://doi.org/10.1016/S0040-4039\(01\)00031-4](https://doi.org/10.1016/S0040-4039(01)00031-4).
- <sup>S</sup> Rix K., Kelsall G.H., Hellgardt K., Hii K.K.M. Chemo- and Diastereoselectivities in the Electrochemical Reduction of Maleimides. *ChemSusChem* **2015**, 8, 665-671. <https://dx.doi.org/10.1002%2Fcsc.201403184>.
- <sup>T</sup> Nguyen H.N., Cee V.J., Deak H.L., Du B., Faber K.P., Gunaydin H., Hodous B.L., Hollis S.L., Krolkowski P.H., Olivieri P.R., Patel V.F., Romero K., Schenkel L.B., Geuns-Meyer S.D. Synthesis of 4-substituted chlorophthalazines, dihydrobenzoazepinediones, 2-pyrazolylbenzoic acid, and 2-pyrazolylbenzohydrazide via 3-substituted 3-hydroxyisoindolin-1-ones. *J. Org. Chem.* **2012**, 77, 3887-3906. <https://doi.org/10.1021/jo3000628>.
- <sup>U</sup> Schilling W., Zhang Y., Riemer D., Das S. Visible-Light-Mediated Dearomatisation of Indoles and Pyrroles to Pharmaceuticals and Pesticides. *Chem. Eur. J.* **2020**, 26, 390-395. <https://doi.org/10.1002/chem.201904168>.
- <sup>V</sup> Hu W., Zheng J., Li J., Liu B., Wu W., Liu H., Jiang H. Assembly of Polysubstituted Maleimides via Palladium-Catalyzed Cyclization Reaction of Alkynes with Isocyanides. *J. Org. Chem.* **2016**, 81, 12451-12458. <https://doi.org/10.1021/acs.joc.6b02227>.
- <sup>W</sup> Bulatov E., Boyarskaya D., Chulkova T., Haukka M. 2,3-Diphenylmaleimide 1-methylpyrrolidin-2-one monosolvate. *Acta Crystallogr. E* **2014**, 70, o260. <https://doi.org/10.1107/S1600536814002372>.
- <sup>X</sup> Yeh H.C., Wu W.C., Wen Y.S., Dai D.C., Wang J.K., Chen C.T. Derivative of  $\alpha,\beta$ -Dicyanostilbene: Convenient Precursor for the Synthesis of Diphenylmaleimide Compounds, *E-Z* Isomerization, Crystal Structure, and Solid-State Fluorescence. *J. Org. Chem.* **2004**, 69, 6455-6462. <https://doi.org/10.1021/jo049512c>.
- <sup>Y</sup> Jafarpour F., Shamsianpour M., Issazadeh S., Dorrani M., Hazrati H. Palladium-catalyzed direct arylation of maleimides: A simple route to bisaryl-substituted maleimides. *Tetrahedron* **2017**, 73, 1668-1672. <https://doi.org/10.1016/j.tet.2017.01.069>.
- <sup>Z</sup> Mendoza-Macias C.L., Solorio-Alvarado C.R., Alonso-Castro A.J., Alba-Betancourt C., Deveze-Alvarez M.A., Padilla-Vaca F., Reyes-Gualito A. Discovery of new effective N-alkyl-3,4-diarylmaleimides-based drugs for reversing the bacterial resistance to rhodamine 6G in *Bacillus subtilis*. *Chem. Pap.* **2020**, 74, 1429-1438. <https://doi.org/10.1007/s11696-019-00992-7>.
- <sup>AA</sup> Chen P., Cao W., Li X., Shi D. A Unified Approach for Divergent Synthesis of Heterocycles via TMSOTf-Catalyzed Formal [3+2] Cycloaddition of Electron-Rich Alkynes. *Adv. Synth. Catal.* **2021**, 363, 4789-4794. <https://doi.org/10.1002/adsc.202100769>.
- <sup>BB</sup> Zheng R., Mei X., Lin Z., Zhao Y., Yao H., Lva W., Ling Q. Strong CIE activity, multi-stimuli-responsive fluorescence and data storage application of new diphenyl maleimide derivatives. *J. Mater. Chem. C* **2015**, 3, 10242-10248. <https://doi.org/10.1039/C5TC02374B>.
- <sup>CC</sup> Boubekour K., Grandjean D., Florac C., Robert A. Structure of N-methoxycarbonylamino-3,4-bis(4-nitrophenyl)maleimide at 140 K. *Acta Crystallogr. C* **1991**, C47, 1107-1108. <https://doi.org/10.1107/S0108270190010204>.
- <sup>DD</sup> Allen F.H. The Cambridge Structural Database: a quarter of a million crystal structures and rising. *Acta Crystallogr. B* **2002**, 58, 380-388. <https://doi.org/10.1107/S0108768102003890>.
- <sup>EE</sup> Modzelewska-Banachiewicz B., Ucherek M., Zimecki M., Kutkowska J., Kaminska T., Morak-Młodawska B., Paprocka R., Szulc M., Lewandowski G., Marciniak J., Bobkiewicz-Kozłowska T. Reactions of N<sup>3</sup>-substituted



---

amidrazones with *cis*-1,2-cyclohexanedicarboxylic anhydride and biological activities of the products. *Arch. Pharm. Chem. Life Sci.* **2012**, 345, 486-494. <https://doi.org/10.1002/ardp.201100333>.

<sup>FF</sup> Ziegler-Borowska M., Ucherek M., Kutkowska J., Mazur L., Modzelewska-Banachiewicz B., Kedziera D., Kaczmarek-Kedziera A. Reaction of N<sup>3</sup>-phenylbenzamidrazone with *cis*-1,2-cyclohexanedicarboxylic anhydride. *Tetrahedron Lett.* **2010**, 51, 2951-2955. <https://doi.org/10.1016/j.tetlet.2010.03.116>.

<sup>GG</sup> Salem A.B., Salah B.B., Mhalla D., Trigui M., Mourer M., Regnoui-de-Vains J.B. Kossentini M. Synthesis, crystal structure and biological studies of novel amidrazones, triazoles, Thiatriazole and Triazine compounds. *J. Mol. Struct.* **2020**, 1214, 128209. <https://doi.org/10.1016/j.molstruc.2020.128209>.

<sup>HH</sup> Mazur L., Modzelewska-Banachiewicz B., Paprocka R., Zimecki M., Wawrzyniak U.E., Kutkowska J., Ziolkowska G. Synthesis, crystal structure and biological activities of a novel amidrazone derivative and its copper(II) complex — A potential antitumor drug. *J. Inorg. Biochem.* **2012**, 114, 55-64. <https://doi.org/10.1016/j.jinorgbio.2012.04.021>.

<sup>I</sup> Mazur L., Saczewski J., Jarzemska K.N., Szwarc-Karabyka K., Paprocka R., Modzelewska-Banachiewicz B. Synthesis, structural characterization and reactivity of new trisubstituted N1-acylamidrazones: solid state and solution studies. *CrystEngComm* **2018**, 20, 4179-4193. <https://doi.org/10.1039/C8CE00701B>.
